# Supplementary material for: Discovery of new Hsp90–Cdc37 protein–protein interaction inhibitors: in silico screening and optimization of anticancer activity
Source: Royal Society of Chemistry journal article supplement (doi:10.1039/d4ra05878j), 2024-01-01
Supplement: d4ra05878j1.pdf [file d4ra05878j1.pdf]

## Discovery of new Hsp90-Cdc37 protein-protein interaction inhibitors: *In silico* screening and optimization of anticancer activity

Jaka Dernovšek<sup>a</sup>, Nina Gradišek<sup>a</sup>, Živa Zajec<sup>a</sup>, Dunja Urbančič<sup>a</sup>, Jernej Cingl<sup>a</sup>, Tjaša Goričan<sup>b</sup>, Simona Golič Grdadolnik<sup>b</sup>, Tihomir Tomašič<sup>a,\*</sup>

<sup>a</sup> Faculty of Pharmacy, University of Ljubljana, Aškerčeva cesta 7, 1000 Ljubljana, Slovenia

<sup>b</sup> Laboratory for Molecular Structural Dynamics, Theory Department, National Institute of Chemistry, Hajdrihova 19, 1001 Ljubljana, Slovenia

### Table of Contents

|                                                     |    |
|-----------------------------------------------------|----|
| 1. Virtual screening.....                           | 2  |
| 2. Representative MST and $K_d$ curves.....         | 3  |
| 3. Western blot images used for quantification..... | 5  |
| 4. NMR with Hsp90 $\beta$ - supporting data.....    | 7  |
| 5. Representative HPLC traces of 8c and 13g.....    | 9  |
| 6. NMR spectra.....                                 | 10 |
| Literature.....                                     | 51 |

## 1. Virtual screening

**Table S1.** Compounds used for building the ligand-based pharmacophore model. Original numbering from the publication is used.<sup>[1]</sup>

| cpd | SMILES                                                                                        |
|-----|-----------------------------------------------------------------------------------------------|
| 17h | <chem>O=S(N(CC(OC)=O)C1=CC=C(NC2=NC(N3CCNCC3)=NC=C2)C=C1)(C4=C(C)C=C(C)C=C4C)=O</chem>        |
| 18h | <chem>O=S(N(CC(O)=O)C1=CC=C(NC2=NC(N3CCNCC3)=NC=C2)C=C1)(C4=C(C)C=C(C)C=C4C)=O</chem>         |
| 19  | <chem>O=S(N(CC(NO)=O)C1=CC=C(NC2=NC(N3CCNCC3)=NC=C2)C=C1)(C4=C(C)C=C(C)C=C4C)=O</chem>        |
| 21  | <chem>O=S(N(CC(C1=NNN=N1)=O)C2=CC=C(NC3=NC(N4CCNCC4)=NC=C3)C=C2)(C5=C(C)C=C(C)C=C5C)=O</chem> |

## 2. Representative MST and $K_d$ curves

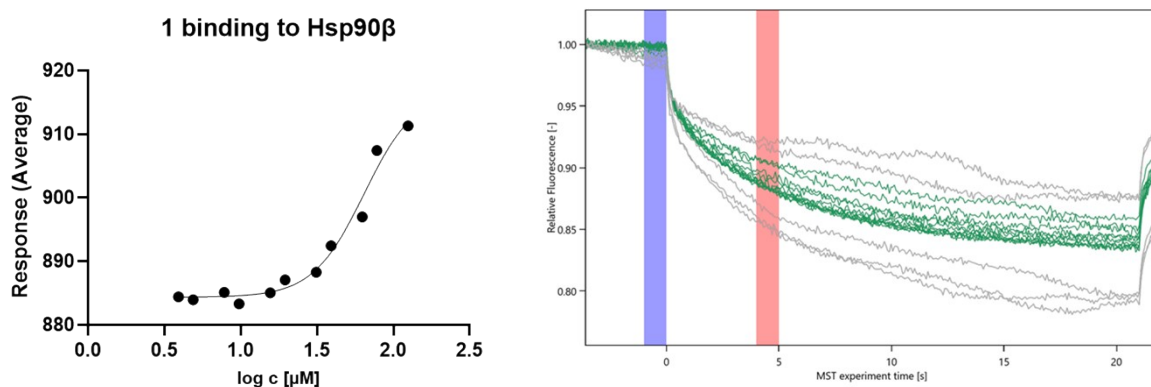

**Figure S1.** MST curves (colored in green) used for calculation of average response that was plotted against the logarithm of concentration of **1** in an attempt to evaluate the binding compound. Concentration range without the presence of aggregation was insufficient for  $K_d$  determination.

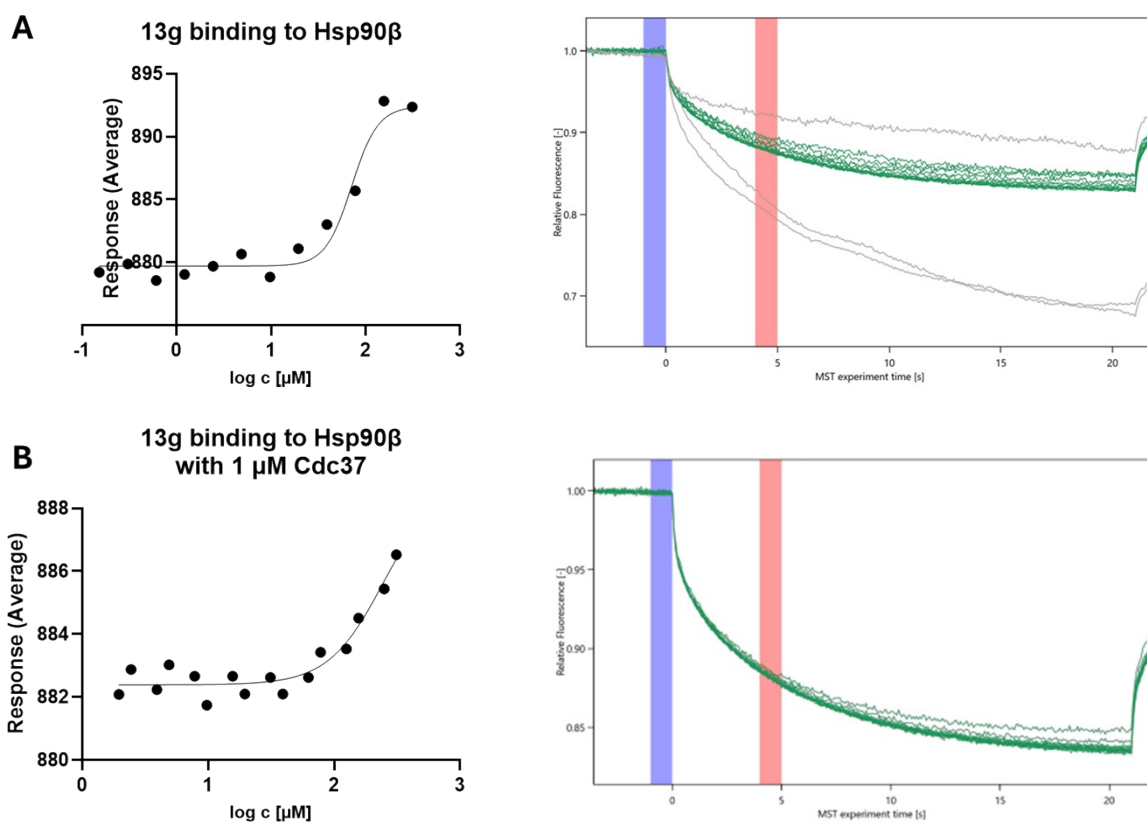

**Figure S2.** Representative MST curves (colored in green) used for calculation of average response that was plotted against the logarithm of concentration of **13g** to determine the  $K_d$  values of this compound with Hsp90β (A). In an attempt to determine the  $K_d$  of **13g** with Hsp90β in the presence of 1  $\mu\text{M}$  Cdc37 (B) the concentration range used was insufficient to enable quantification.

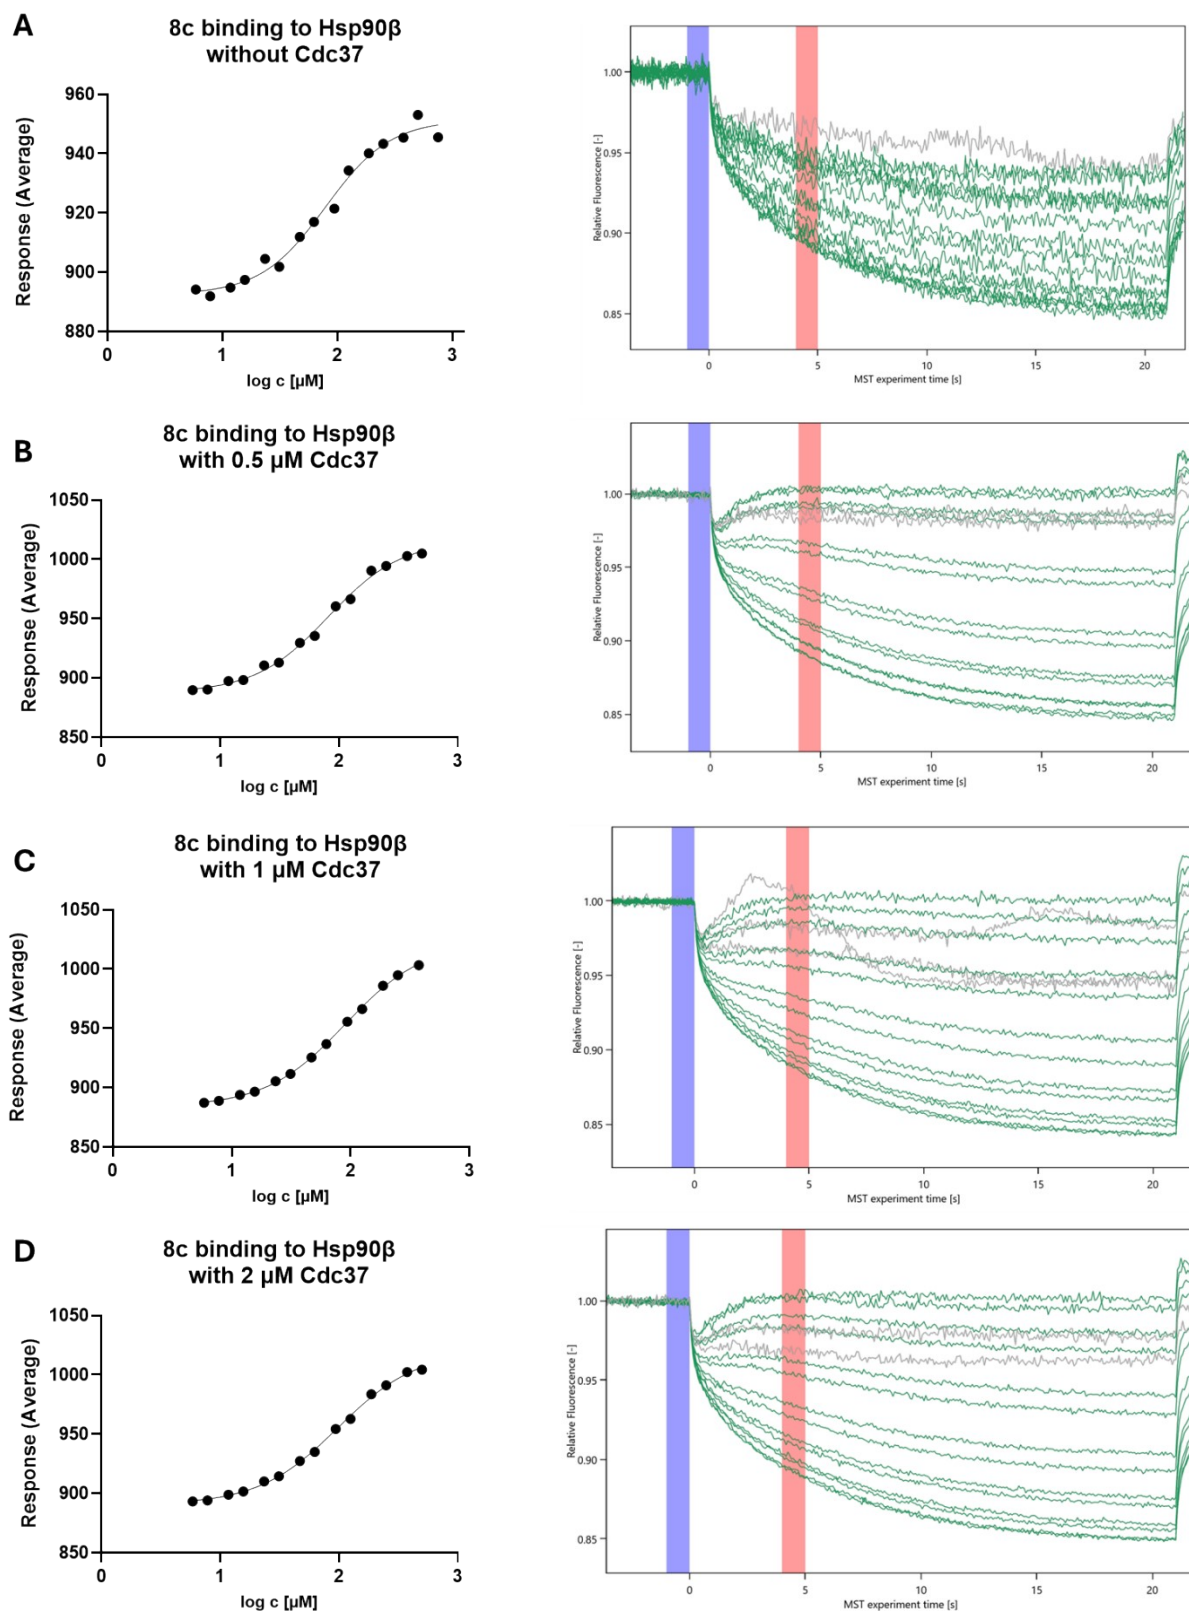

**Figure S3.** Representative MST curves (colored in green) used for calculation of average response that was plotted against the logarithm of concentration of **8c** to determine the  $K_d$  values of this compound with Hsp90 $\beta$  in the presence of 0 (A), 0.5 (B), 1 (C) and 2 (D)  $\mu\text{M}$  of Cdc37.

### 3. Western blot images used for quantification

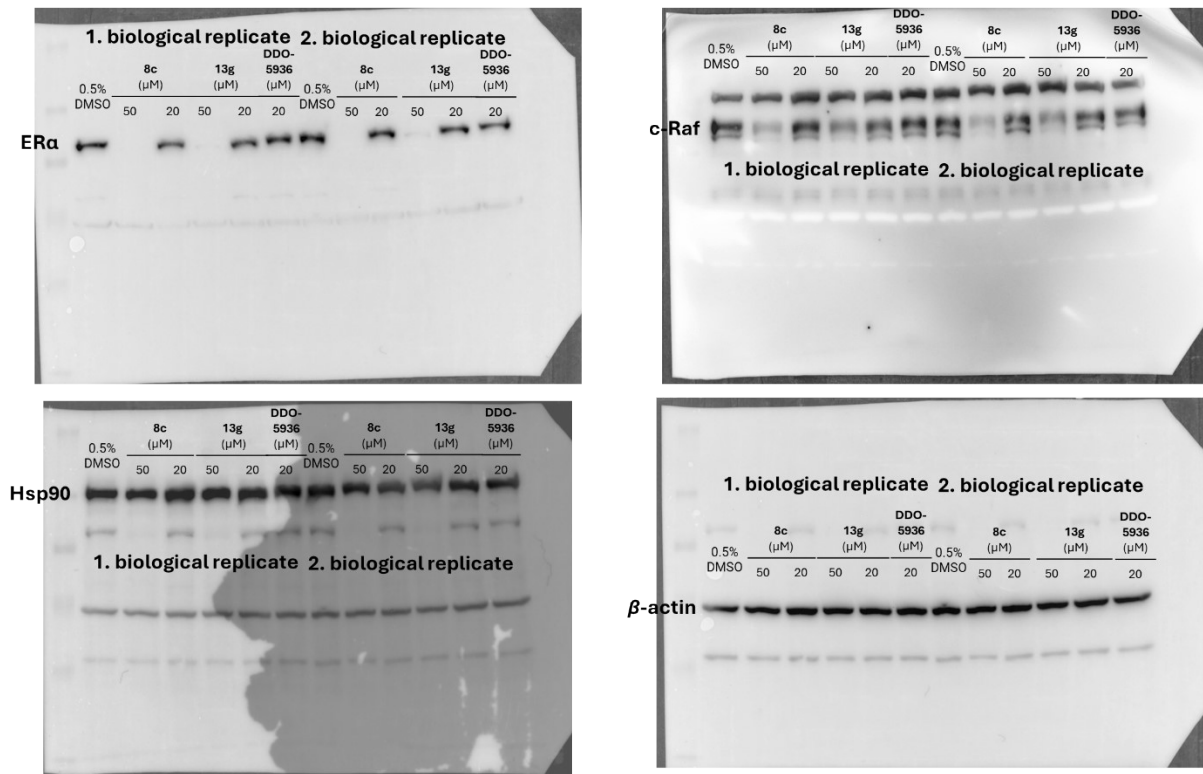

**Figure S4.** Western blot pictures used for quantification of protein in MCF-7 lysates for first and second biological repetitions of ER $\alpha$ , Hsp90 and c-Raf along with  $\beta$ -actin which was used as a standard.

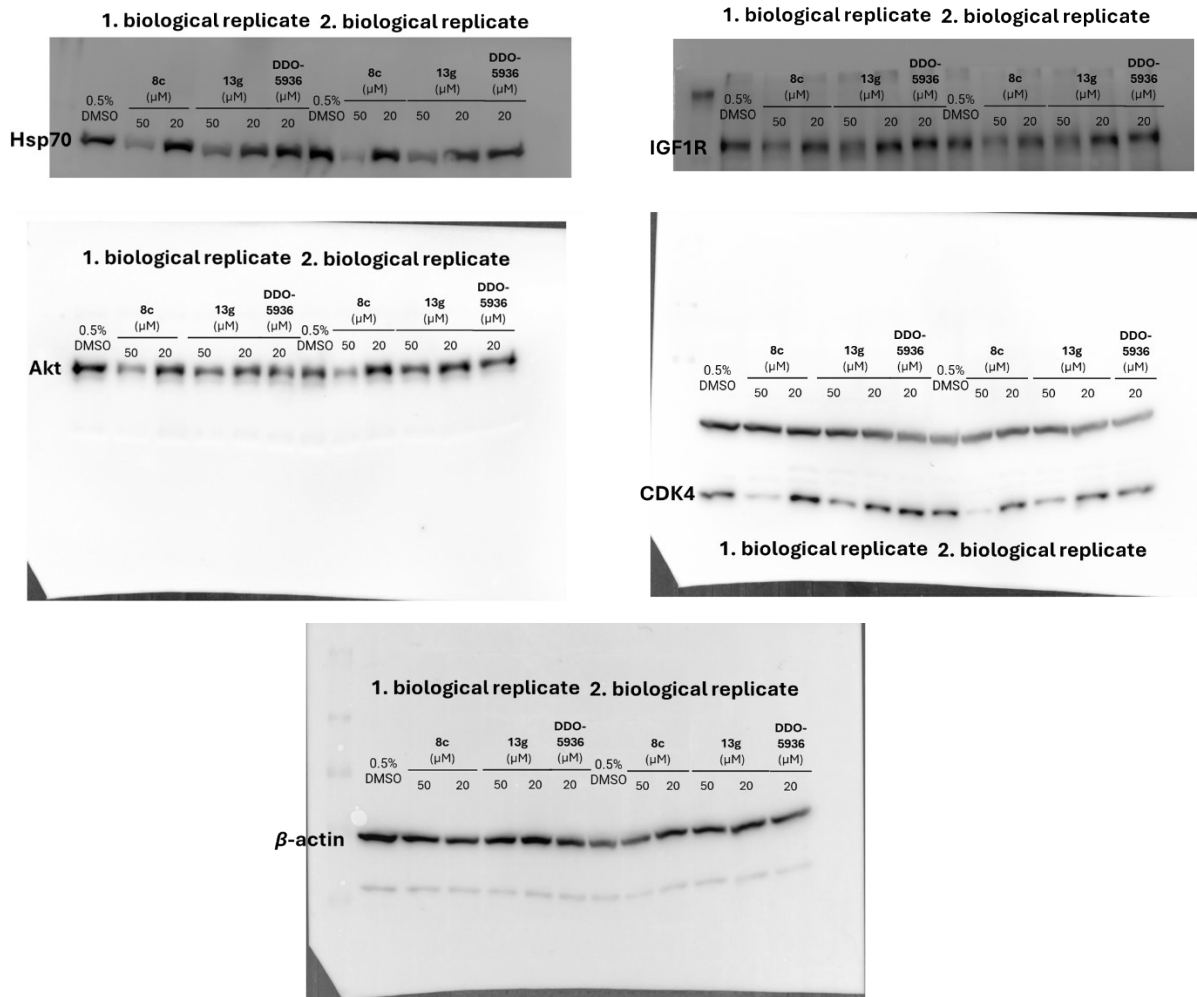

**Figure S5.** Western blot pictures used for quantification of protein in MCF-7 lysates for first and second biological repetitions of IGF1R, Hsp70, Akt and CDK-4 along with β-actin which was used as a standard.

#### 4. NMR with Hsp90 $\beta$ - supporting data

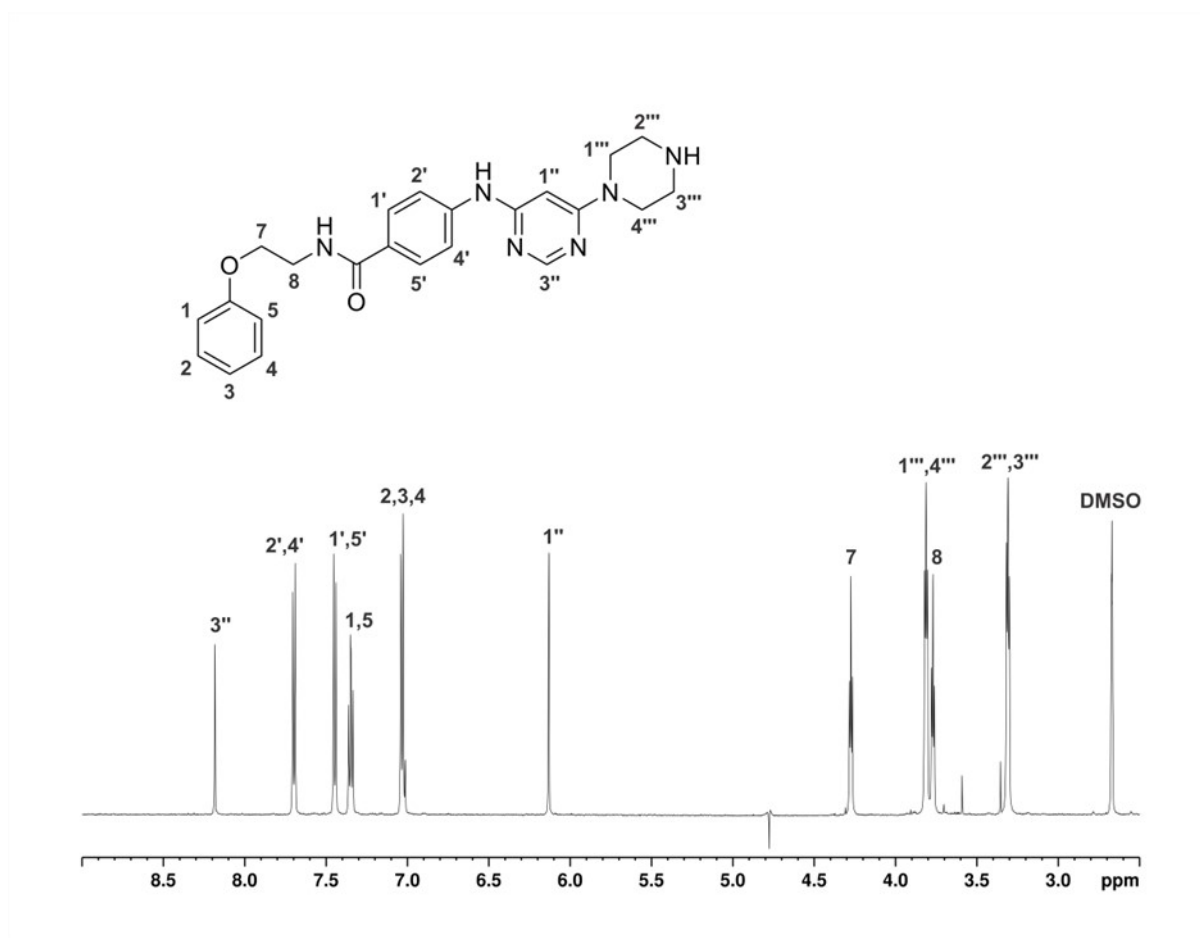

**Figure S6.** <sup>1</sup>H NMR spectrum for the compound **13g** recorded at a concentration of 0.3 mM in 50 mM K-phosphate buffer (pD 7.5), 100 mM KCl, 2 % DMSO-*d*<sub>6</sub> in D<sub>2</sub>O. The proton signals were calibrated to the DSS signal at 0.0 ppm.

**Table S2.** Chemical shifts in ppm of the assigned protons of compound **13g** in phosphate buffer (pD 7.5); referenced to DSS.

| Proton     | <sup>1</sup> H chemical shift [ppm] |
|------------|-------------------------------------|
| 3''        | 8.172                               |
| 2', 4'     | 7.697                               |
| 1', 5'     | 7.456                               |
| 1, 5       | 7.334                               |
| 2, 3, 4    | 7.020                               |
| 1''        | 6.144                               |
| 7          | 4.279                               |
| 1''', 4''' | 3.831                               |
| 8          | 3.759                               |
| 2''', 3''' | 3.294                               |

**Table S3.** STD amplification factors (AMP) and their absolute and relative errors of the assigned protons of compound **13g**.

| Proton | AMP  | AMP absolute error | AMP relative error |
|--------|------|--------------------|--------------------|
| 3"     | 4.88 | 0.09               | 1.9                |
| 2', 4' | 1.78 | 0.03               | 1.4                |
| 1', 5' | 1.75 | 0.02               | 1.4                |
| 1, 5   | 2.18 | 0.03               | 1.2                |
| 2,3,4  | 2.14 | 0.02               | 0.8                |
| 1"     | 0.83 | 0.03               | 3.5                |

**Table S4.** NOE connectivities of the compound **13g** with calculated distances.

| NOE connectivity | Distance [Å]       |                    |
|------------------|--------------------|--------------------|
|                  | 2 NOE interactions | 4 NOE interactions |
| 3" - (1"', 4''') | 3.7                | /                  |
| (1', 5') - 8     | /                  | 3.7                |
| (1, 5) - 8       | /                  | 4.6                |
| 1" - (1"', 4''') | /                  | 2.9                |
| (2', 4') - 1"    | 3.9                | /                  |



## 5. Representative HPLC traces of 8c and 13g

HPLC trace of **8c**, UHPLC:  $t_r$ : 3.02 min (100% at 254 nm).

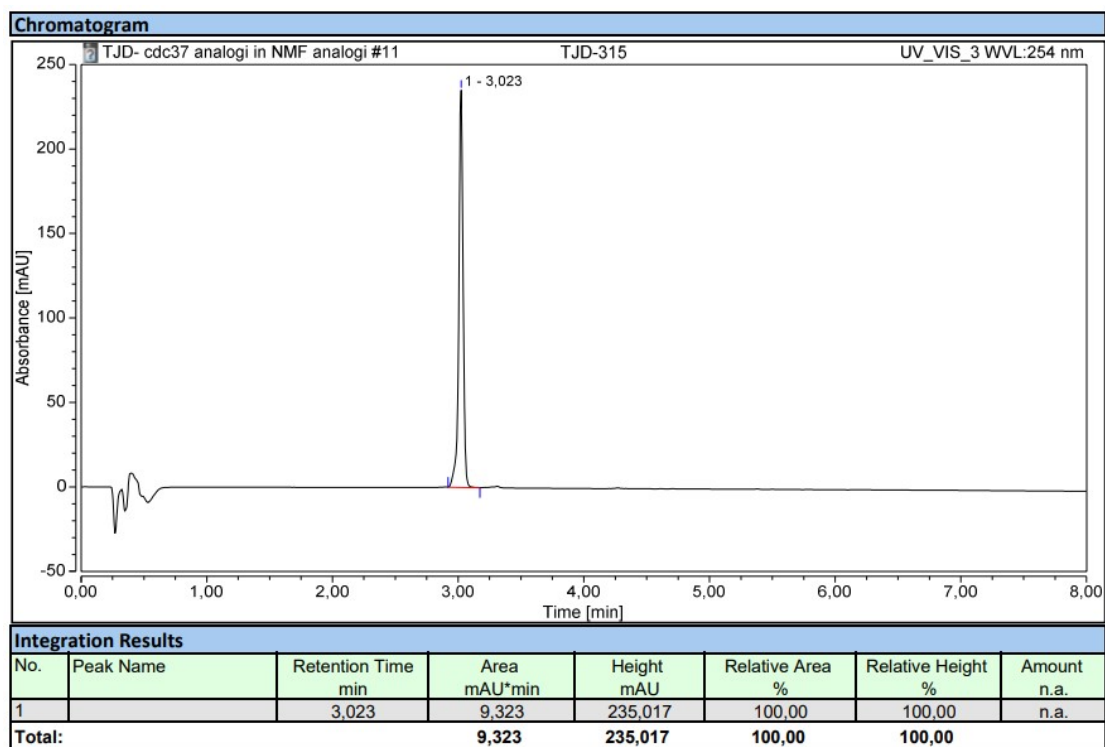

HPLC trace of **13g**, UHPLC:  $t_r$ : 2.82 min (99.1% at 254 nm).

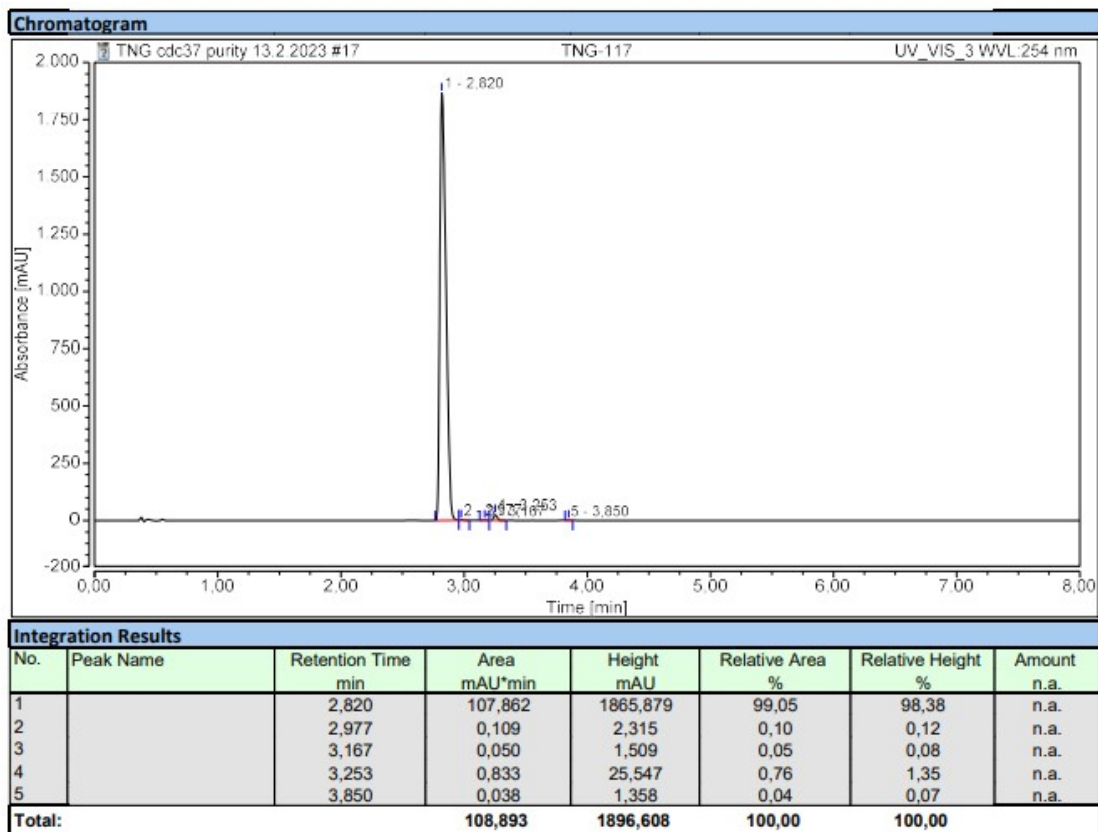

## 6. NMR spectra

Compound **4a**  $^1\text{H}$  NMR (400 MHz,  $\text{DMSO-}d_6$ ):

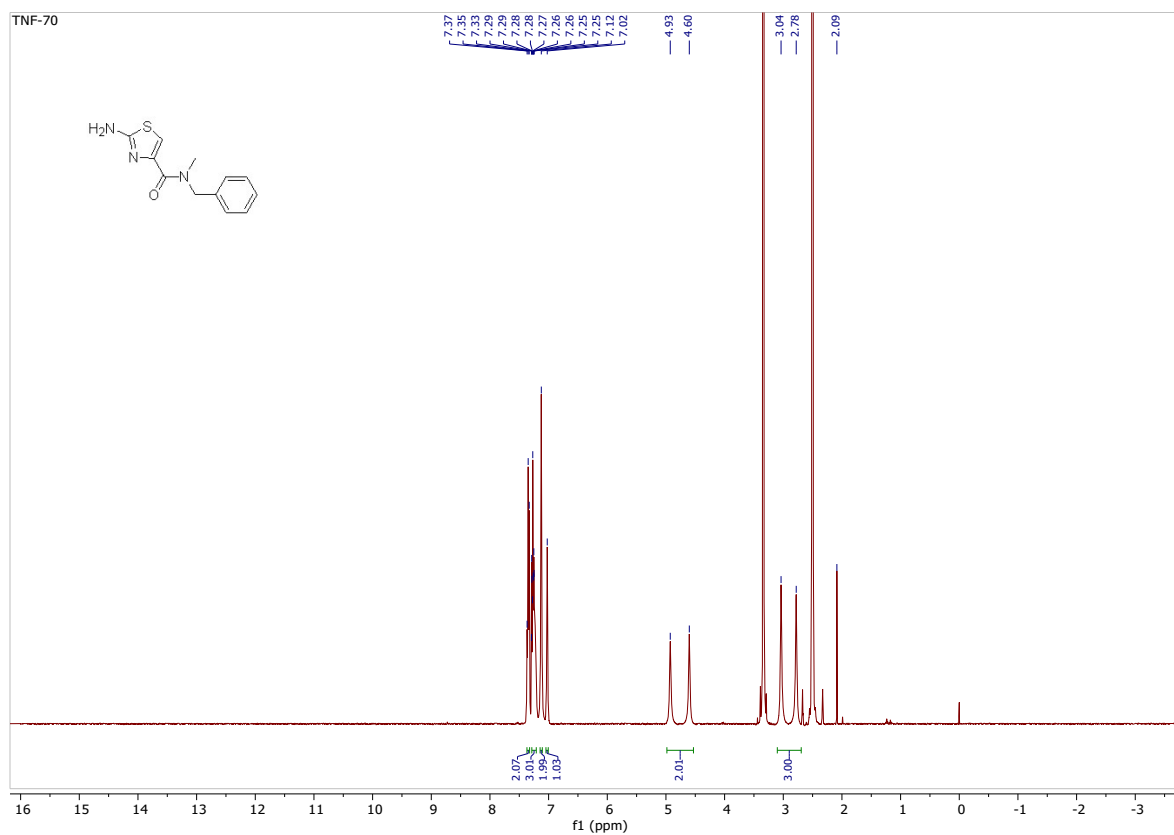

Compound **4a**  $^{13}\text{C}$  NMR (101 MHz,  $\text{DMSO-}d_6$ ):

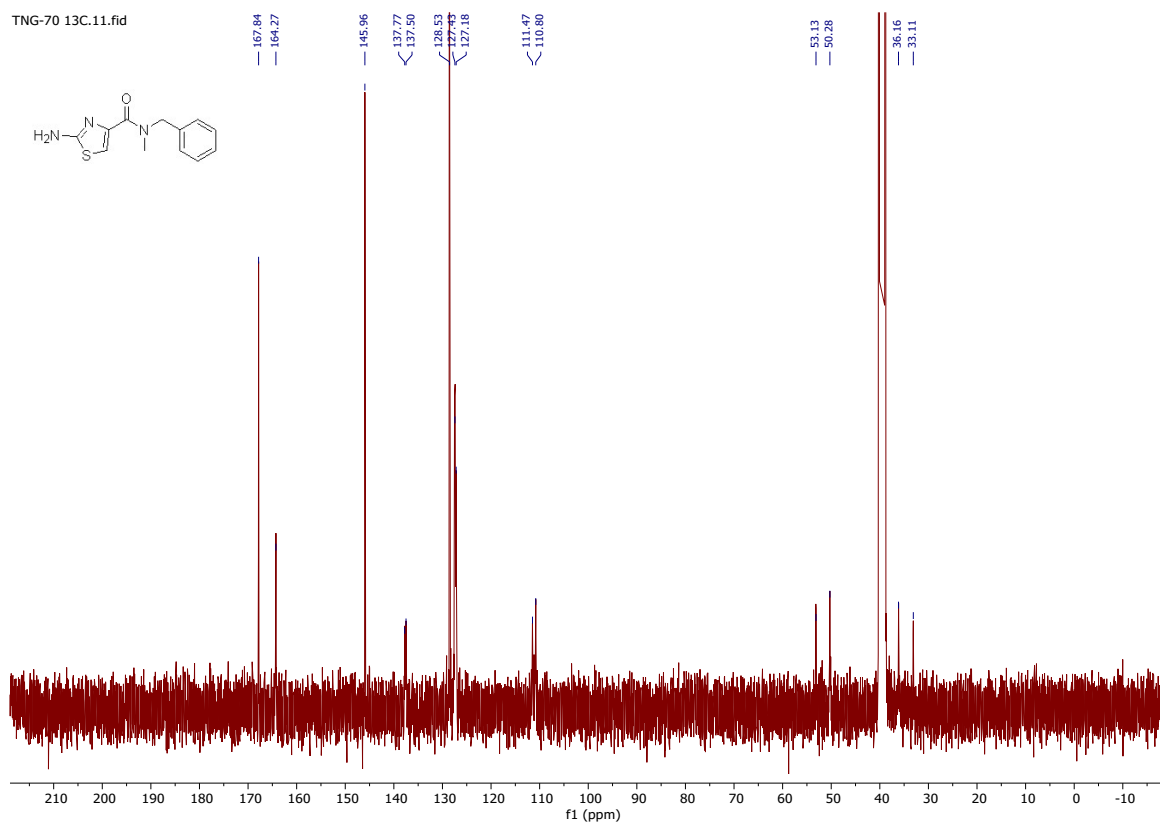

Compound **5a**  $^1\text{H}$  NMR (400 MHz,  $\text{DMSO-}d_6$ ):

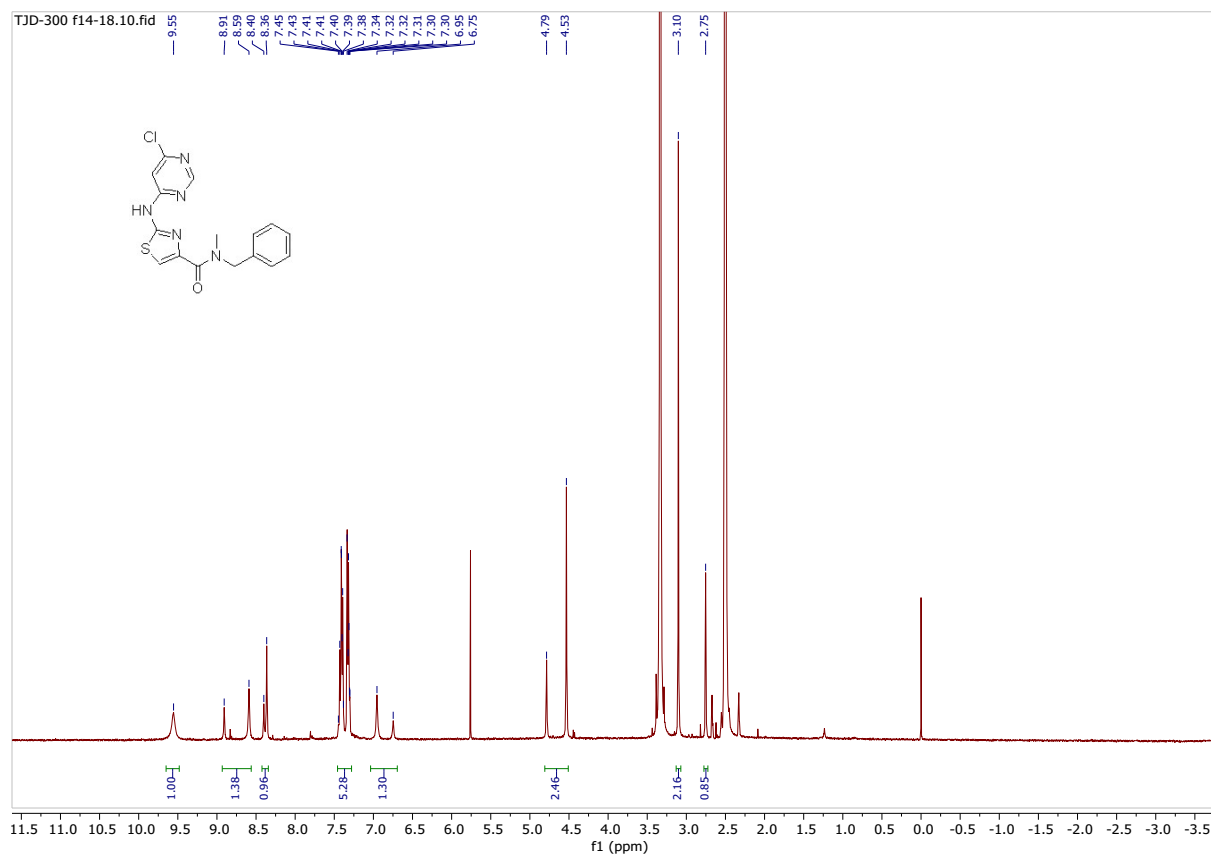

Compound **5a**  $^{13}\text{C}$  NMR (101 MHz,  $\text{DMSO-}d_6$ ):

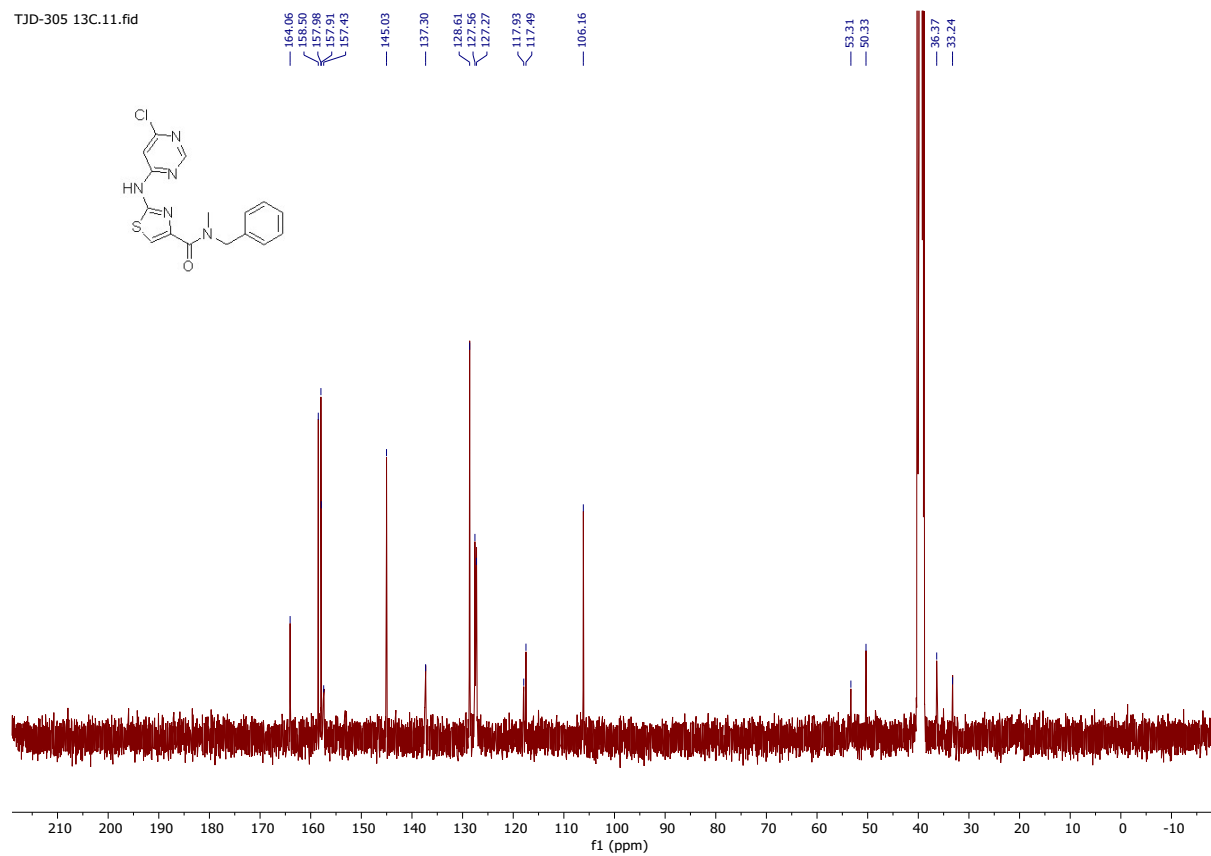

Compound **6a**  $^1\text{H}$  NMR (400 MHz,  $\text{DMSO-}d_6$ ):

TJD-311 conc

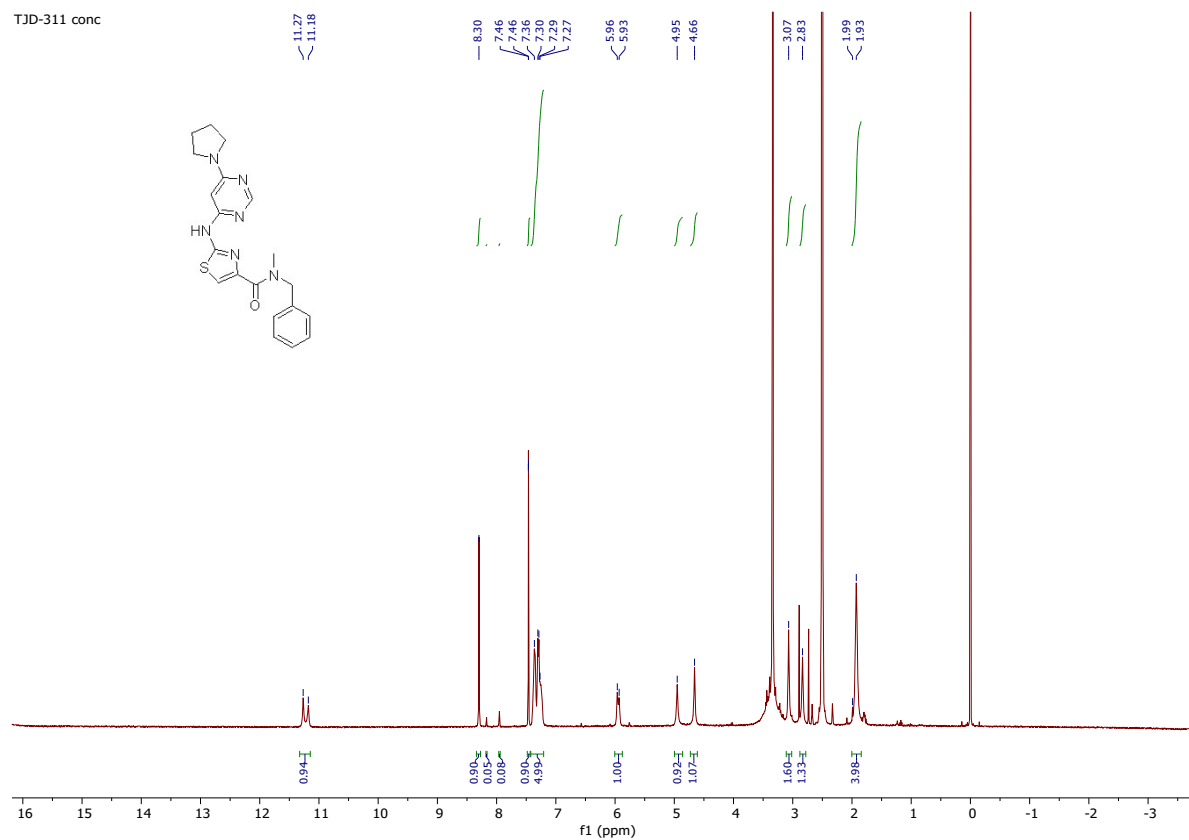

Compound **6a**  $^{13}\text{C}$  NMR (101 MHz,  $\text{DMSO-}d_6$ ):

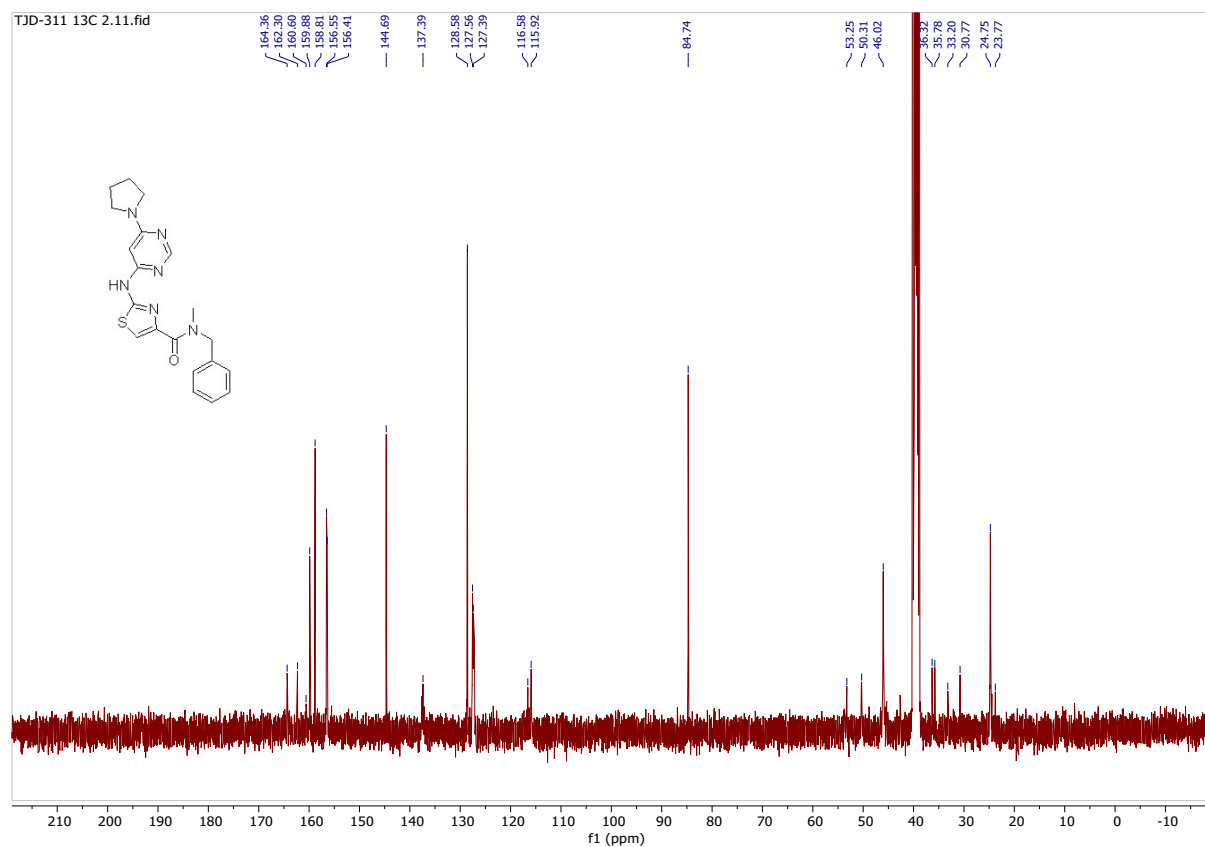

Compound **6b**  $^1\text{H}$  NMR (400 MHz,  $\text{DMSO}-d_6$ ):

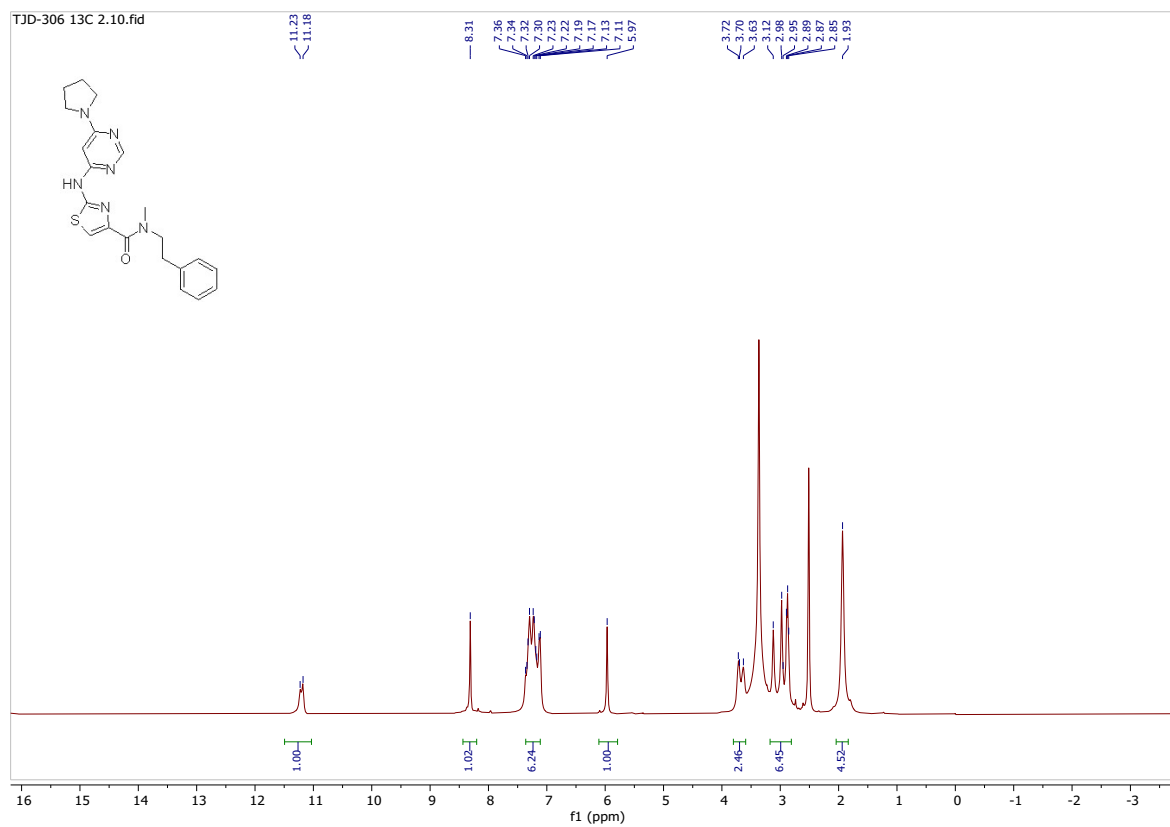

Compound **6b**  $^{13}\text{C}$  NMR (101 MHz,  $\text{DMSO}-d_6$ ):

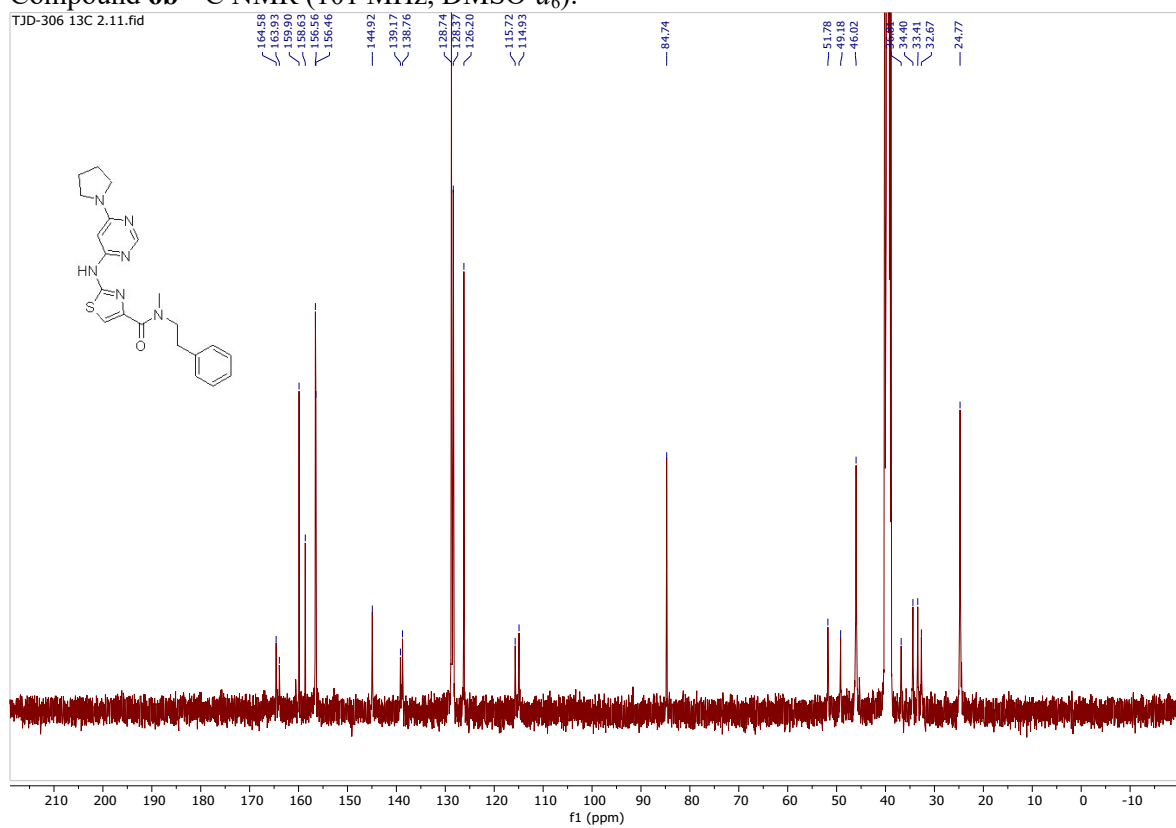

Compound **6c**  $^1\text{H}$  NMR (400 MHz,  $\text{DMSO-}d_6$ ):

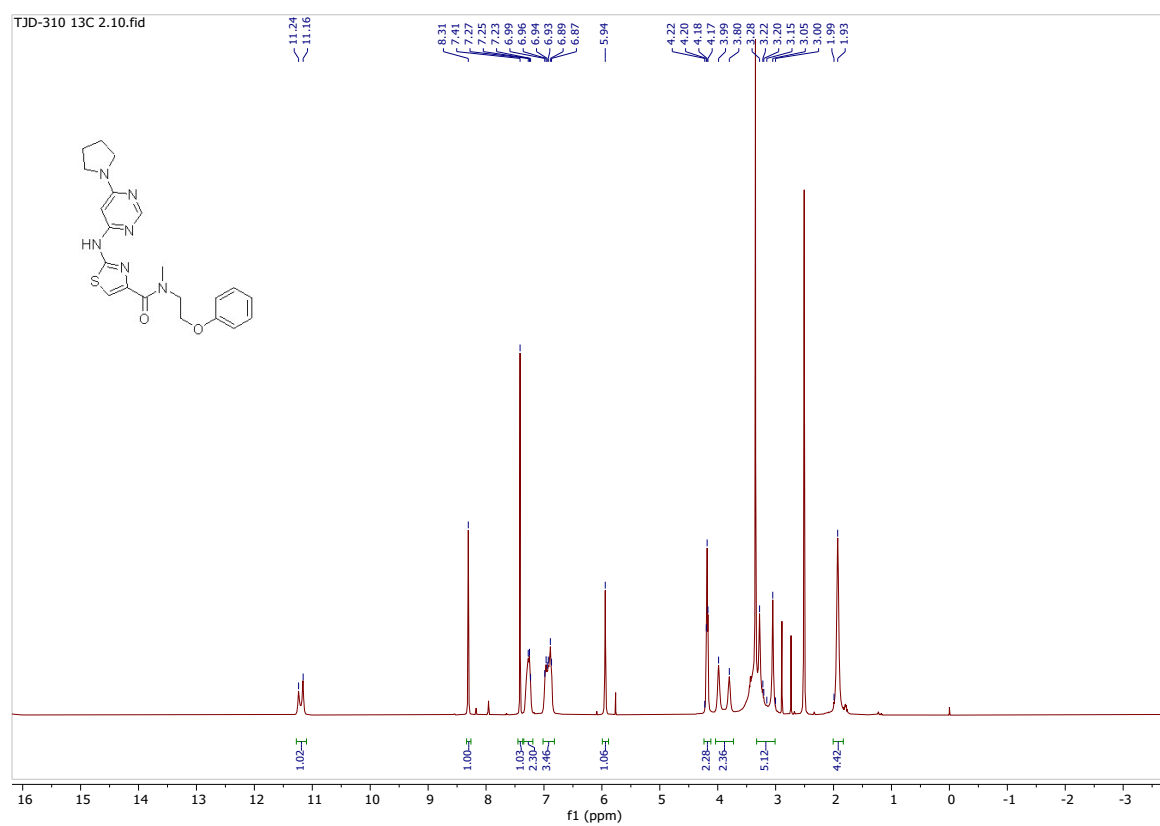

Compound **6c**  $^{13}\text{C}$  NMR (101 MHz,  $\text{DMSO-}d_6$ ):

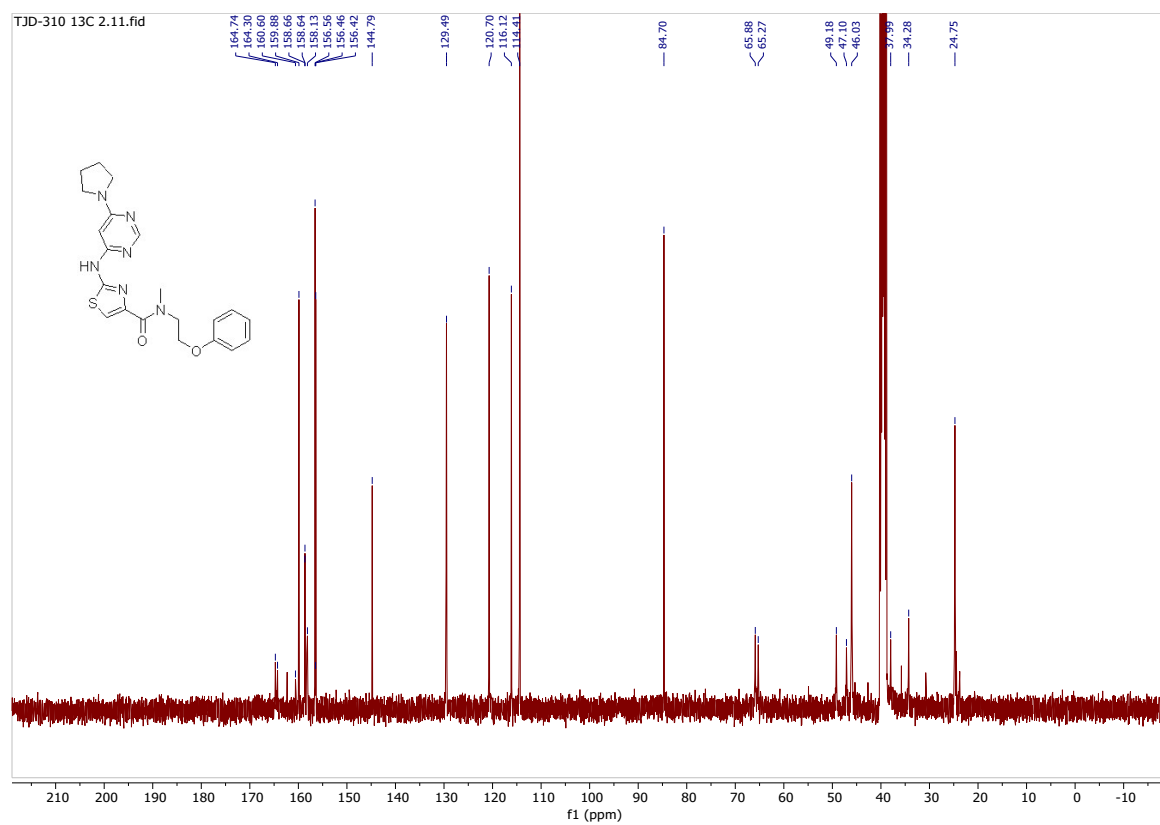

Compound **7c**  $^1\text{H}$  NMR (400 MHz,  $\text{DMSO}-d_6$ ):

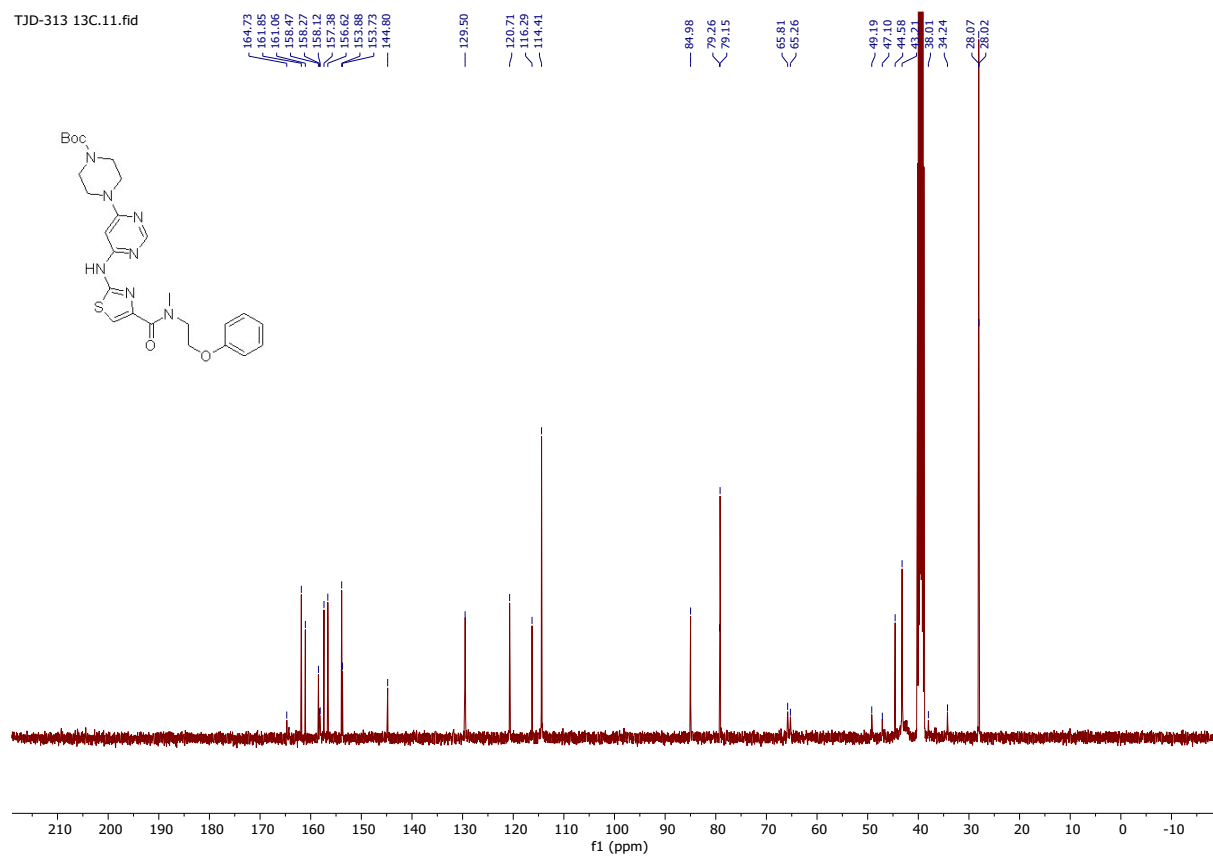

Compound **7c**  $^{13}\text{C}$  NMR (101 MHz,  $\text{DMSO}-d_6$ ):

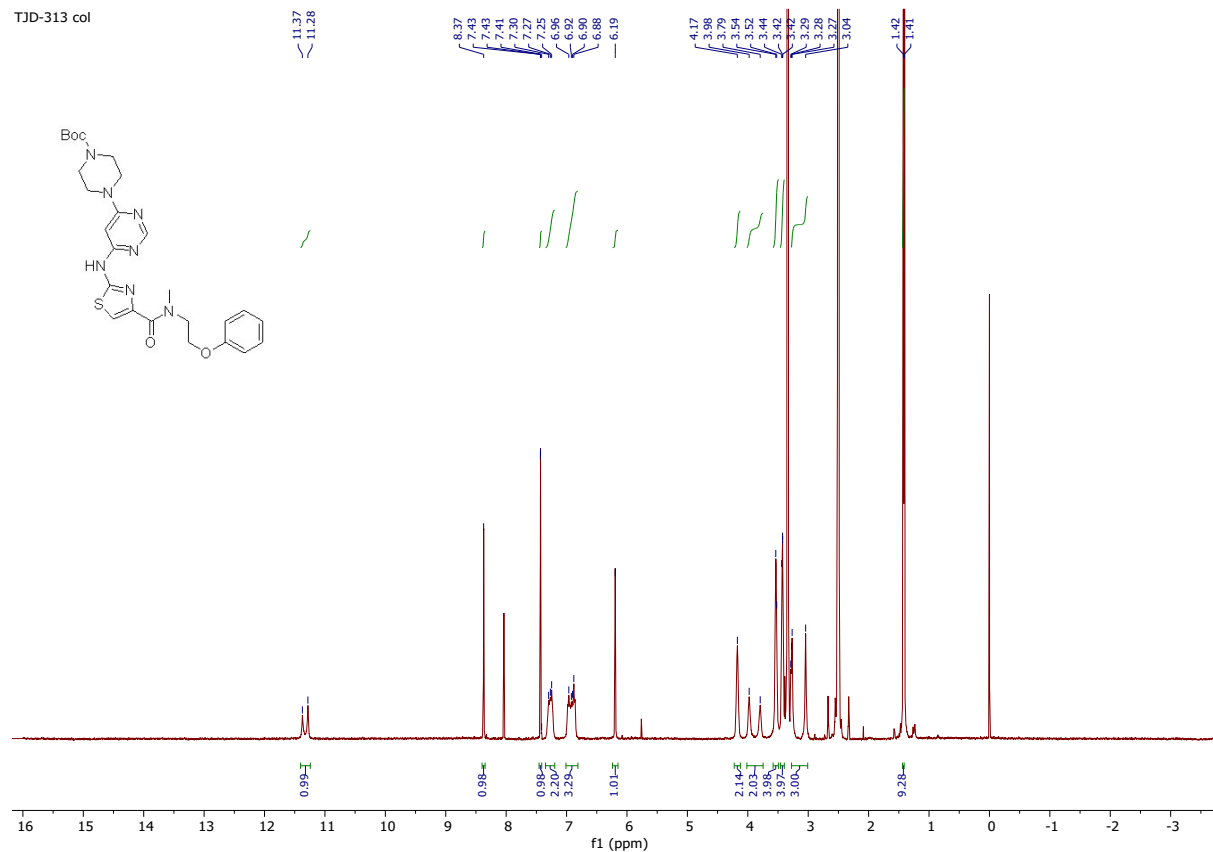

Compound **8a**  $^1\text{H}$  NMR (400 MHz,  $\text{DMSO-}d_6$ ):

TJD-314 col

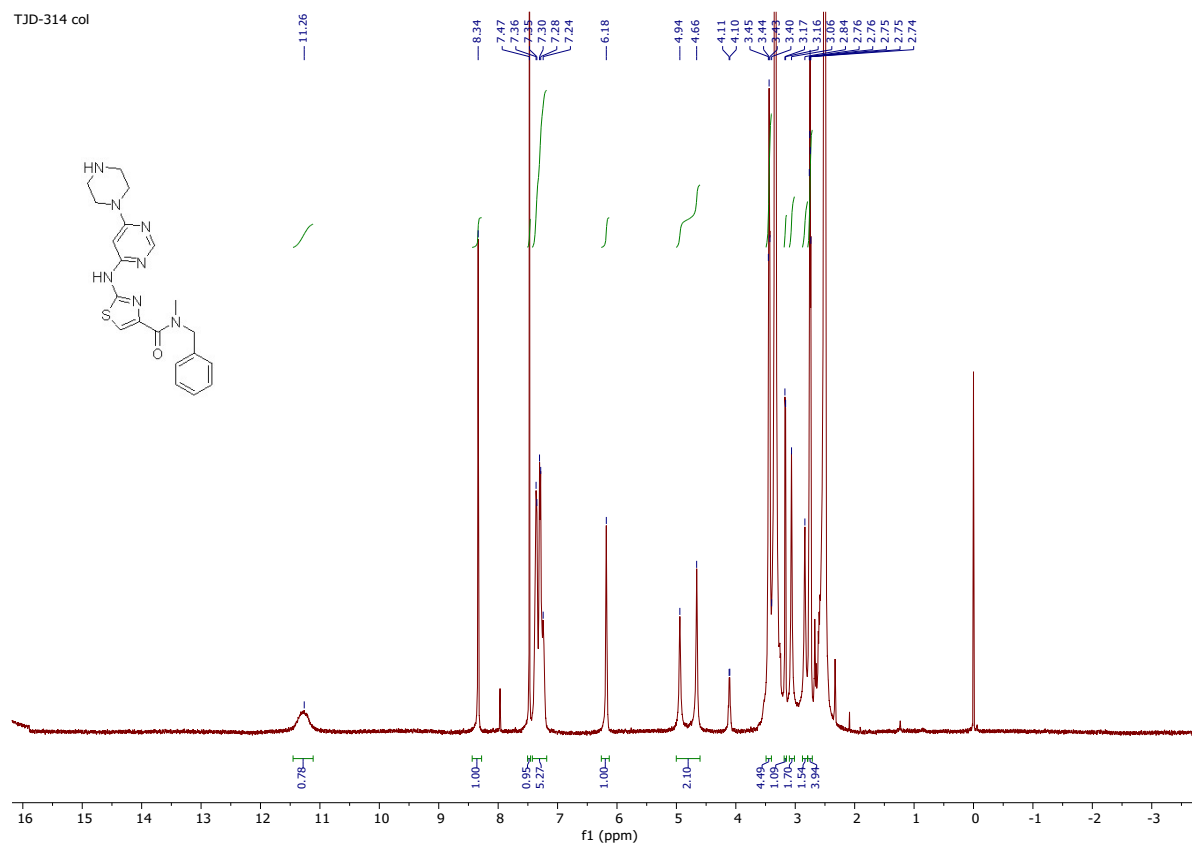

Compound **8a**  $^{13}\text{C}$  NMR (101 MHz,  $\text{DMSO-}d_6$ ):

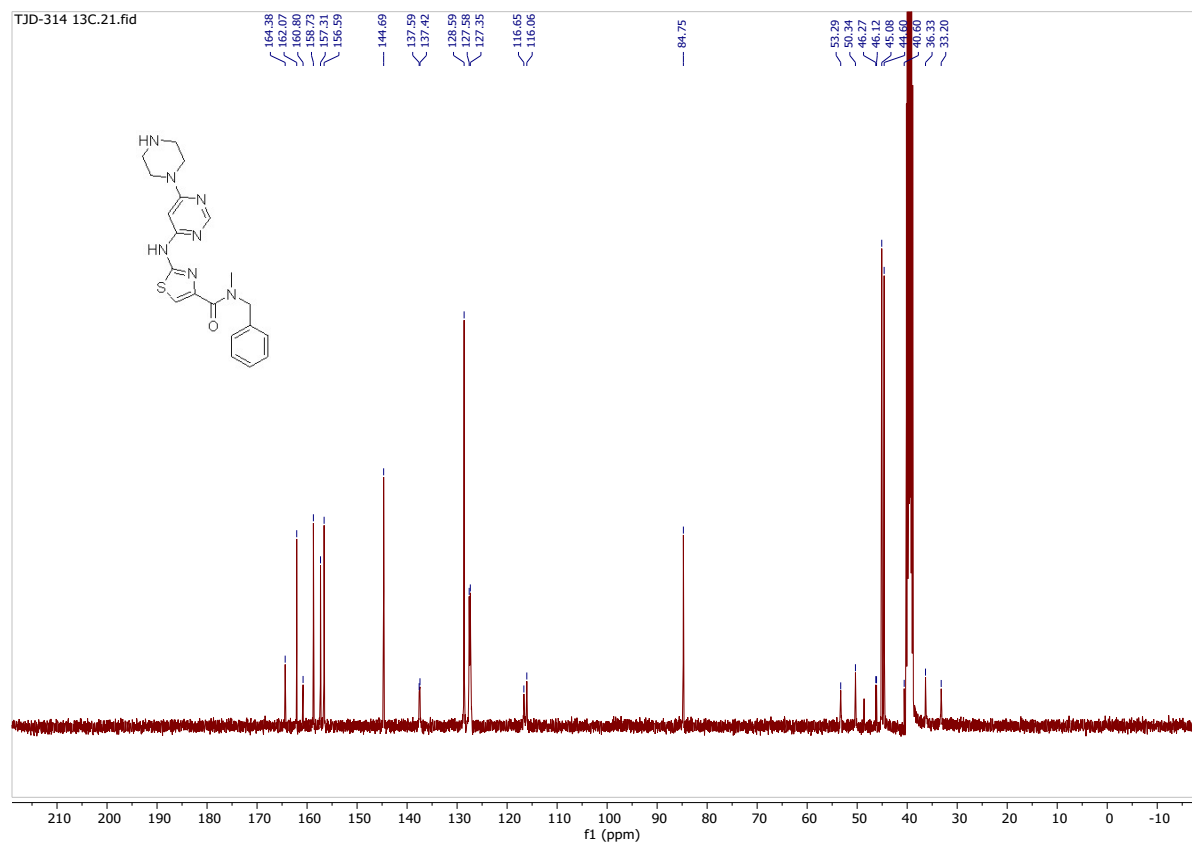



Compound **8b**  $^1\text{H}$  NMR (400 MHz,  $\text{DMSO-}d_6$ ):

TJD-308a f38-48 conc

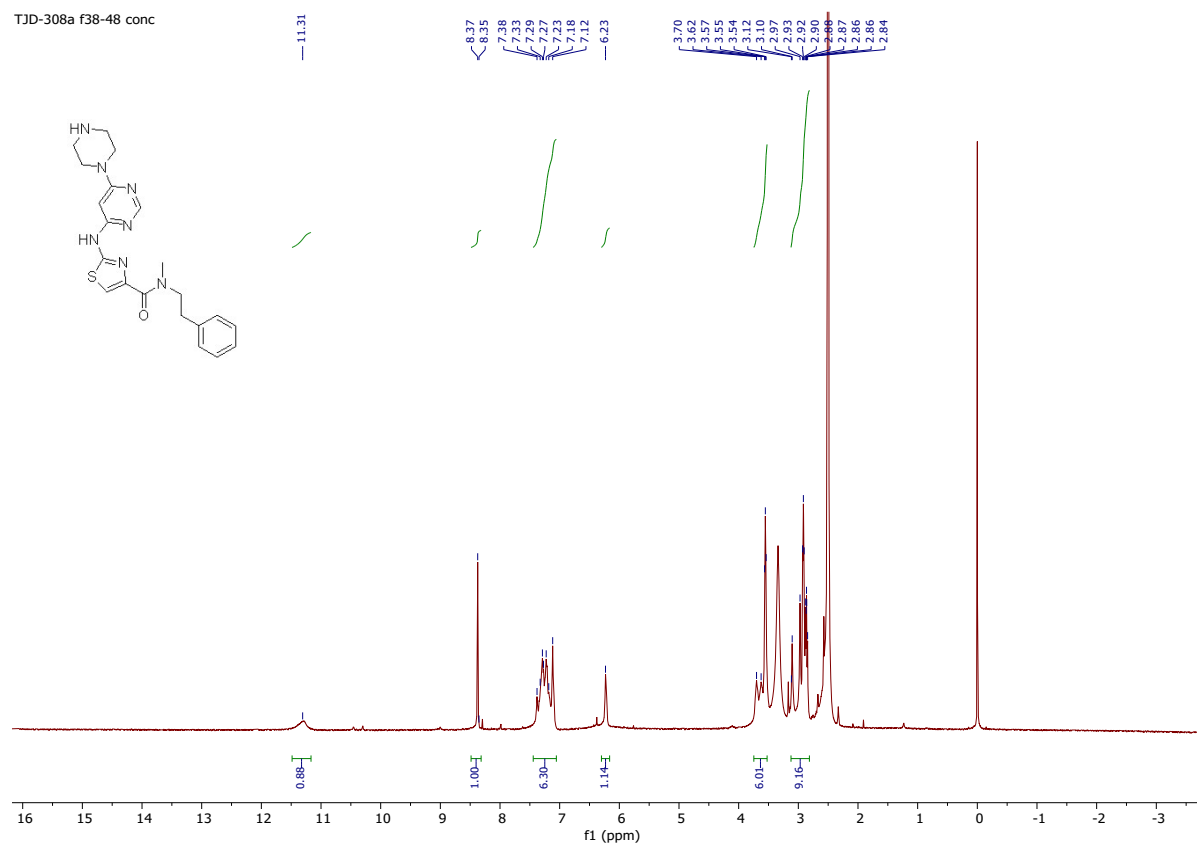

Compound **8b**  $^{13}\text{C}$  NMR (101 MHz,  $\text{DMSO-}d_6$ ):

TJD-308a 13C 2.11.fid

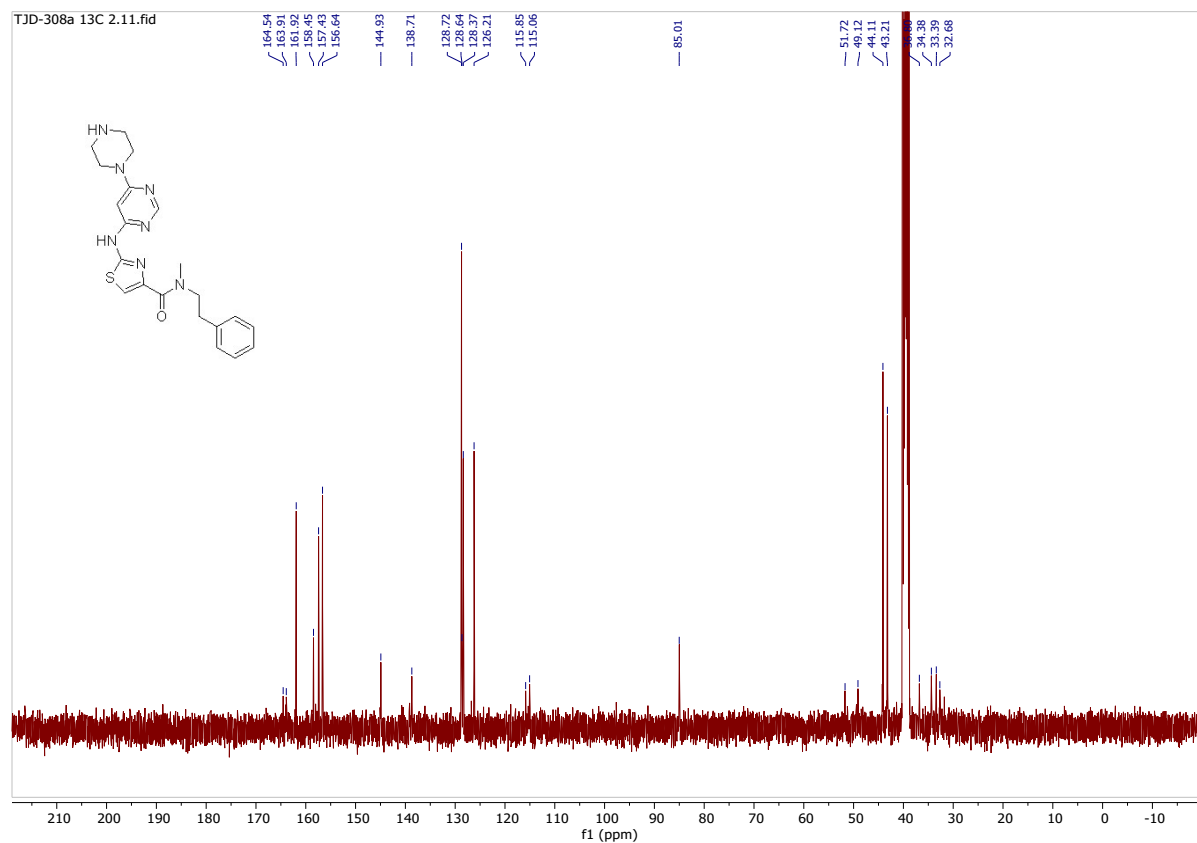

Compound **8c**  $^1\text{H}$  NMR (400 MHz,  $\text{DMSO-}d_6$ ):

TJD-315 col

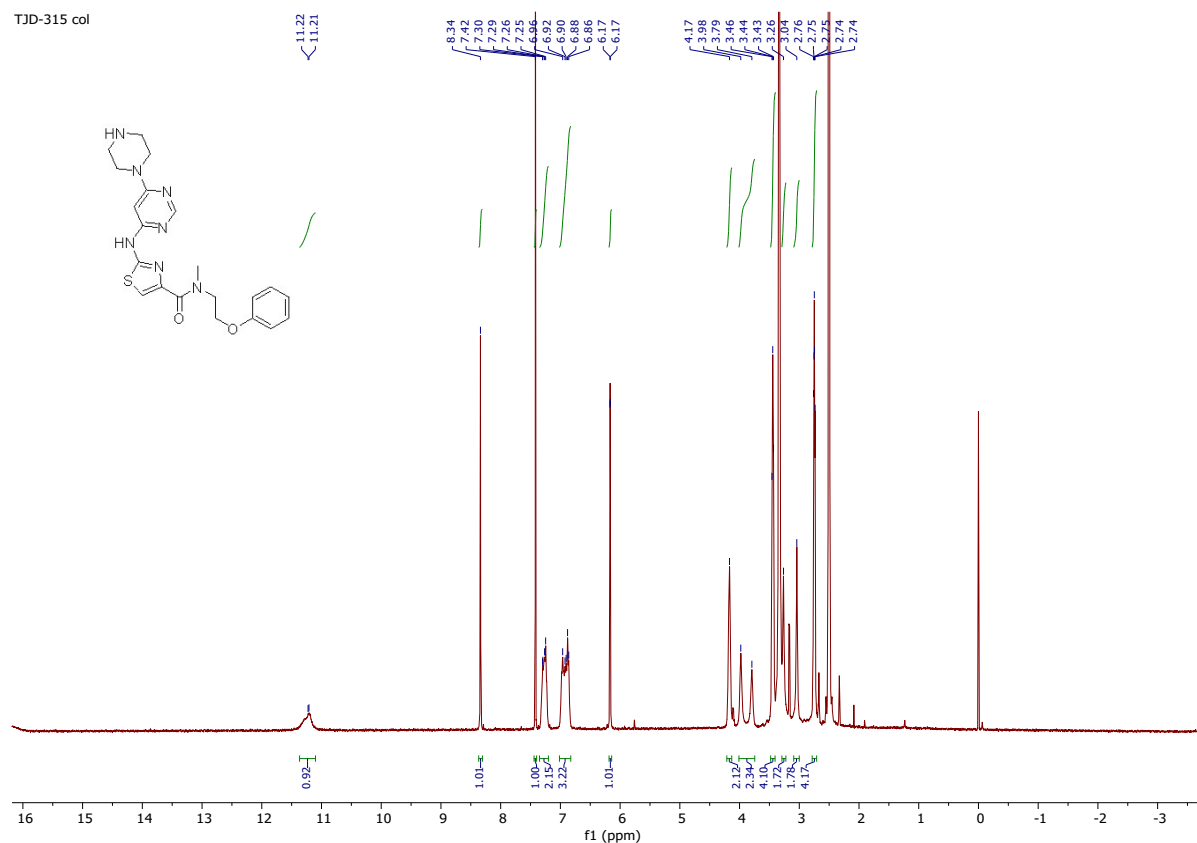

Compound **8c**  $^{13}\text{C}$  NMR (101 MHz,  $\text{DMSO-}d_6$ ):

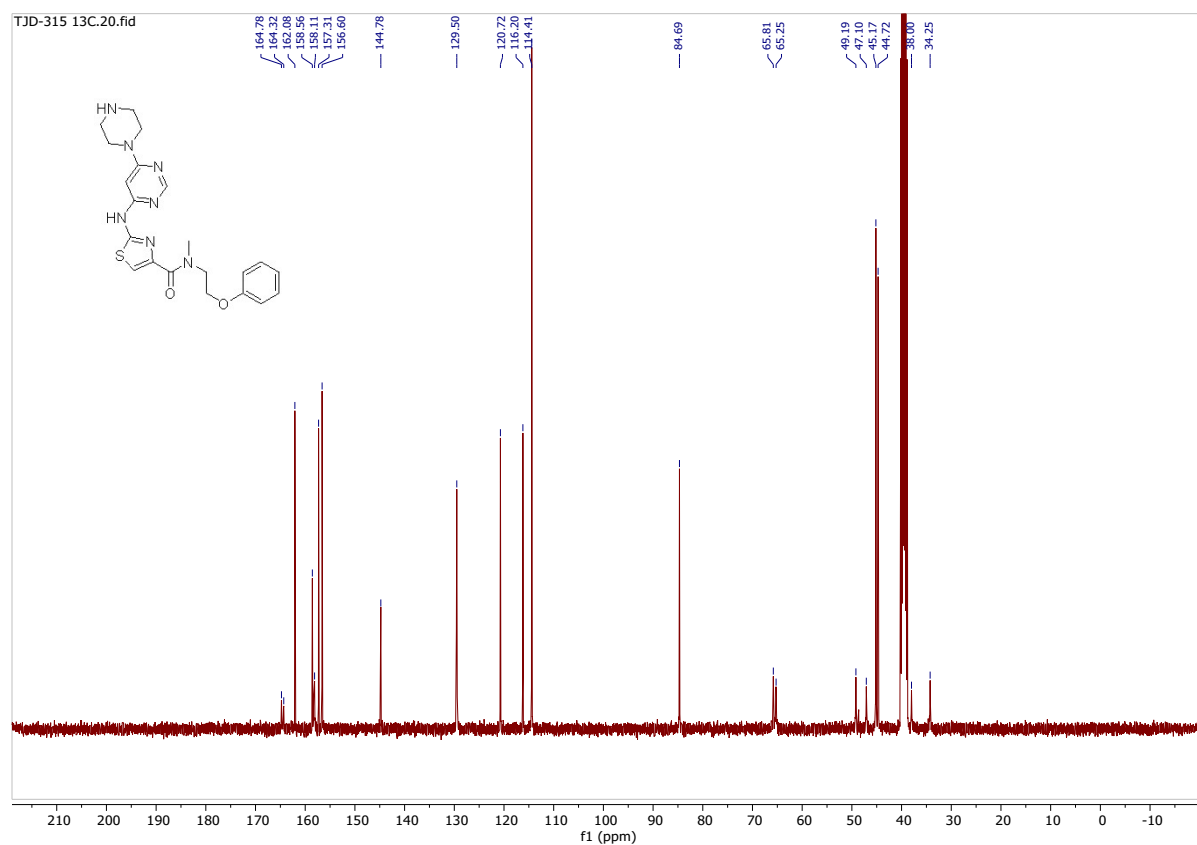

Compound **9g**  $^1\text{H}$  NMR (400 MHz,  $\text{DMSO-}d_6$ ):

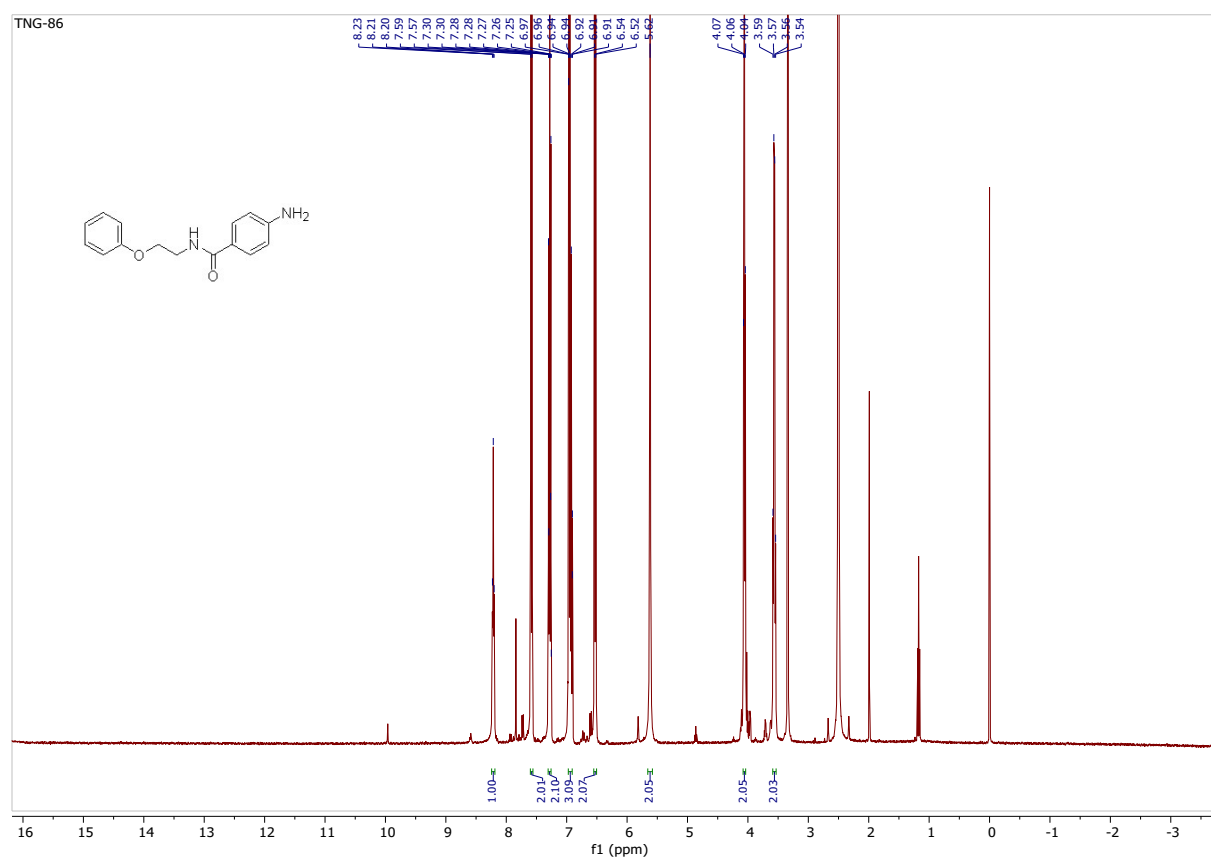

Compound **9g**  $^{13}\text{C}$  NMR (101 MHz,  $\text{DMSO-}d_6$ ):

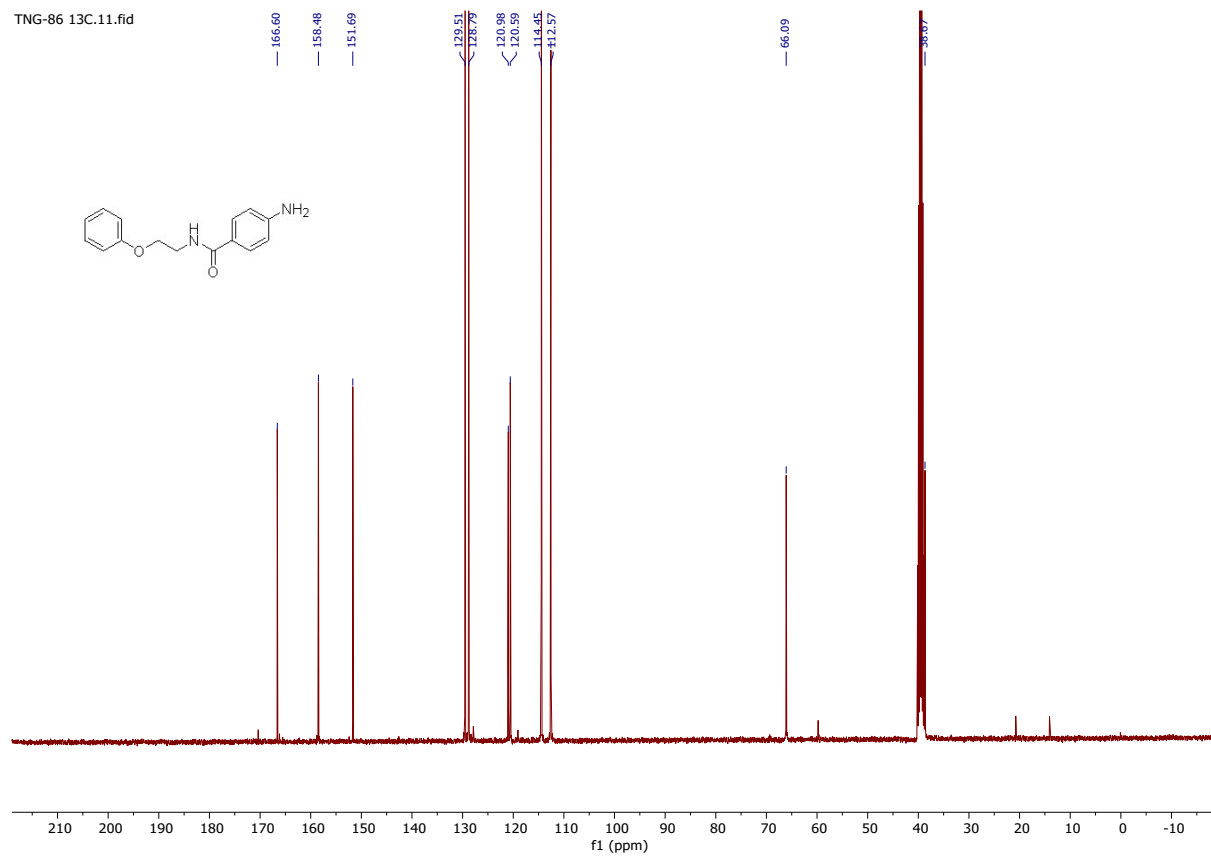

Compound **10g**  $^1\text{H}$  NMR (400 MHz,  $\text{DMSO-}d_6$ ):

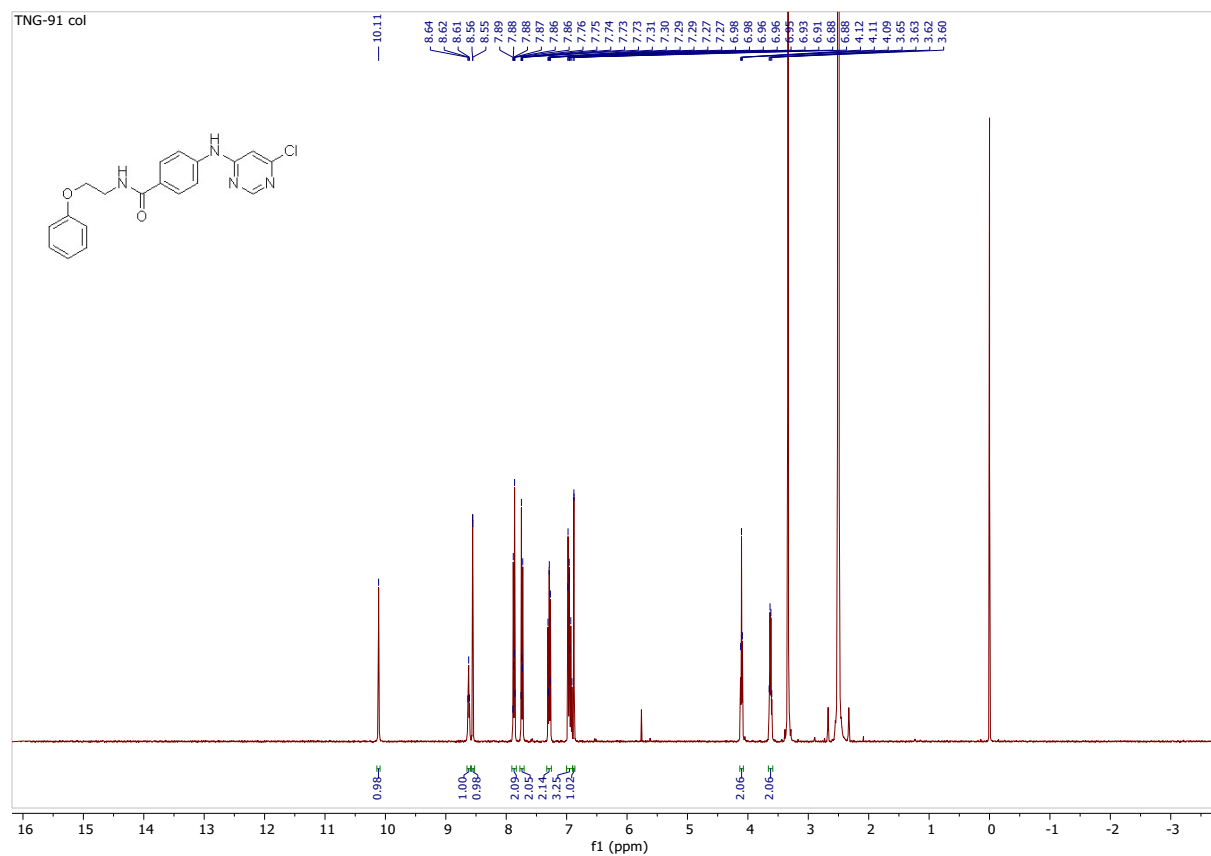

Compound **10g**  $^{13}\text{C}$  NMR (101 MHz,  $\text{DMSO-}d_6$ ):

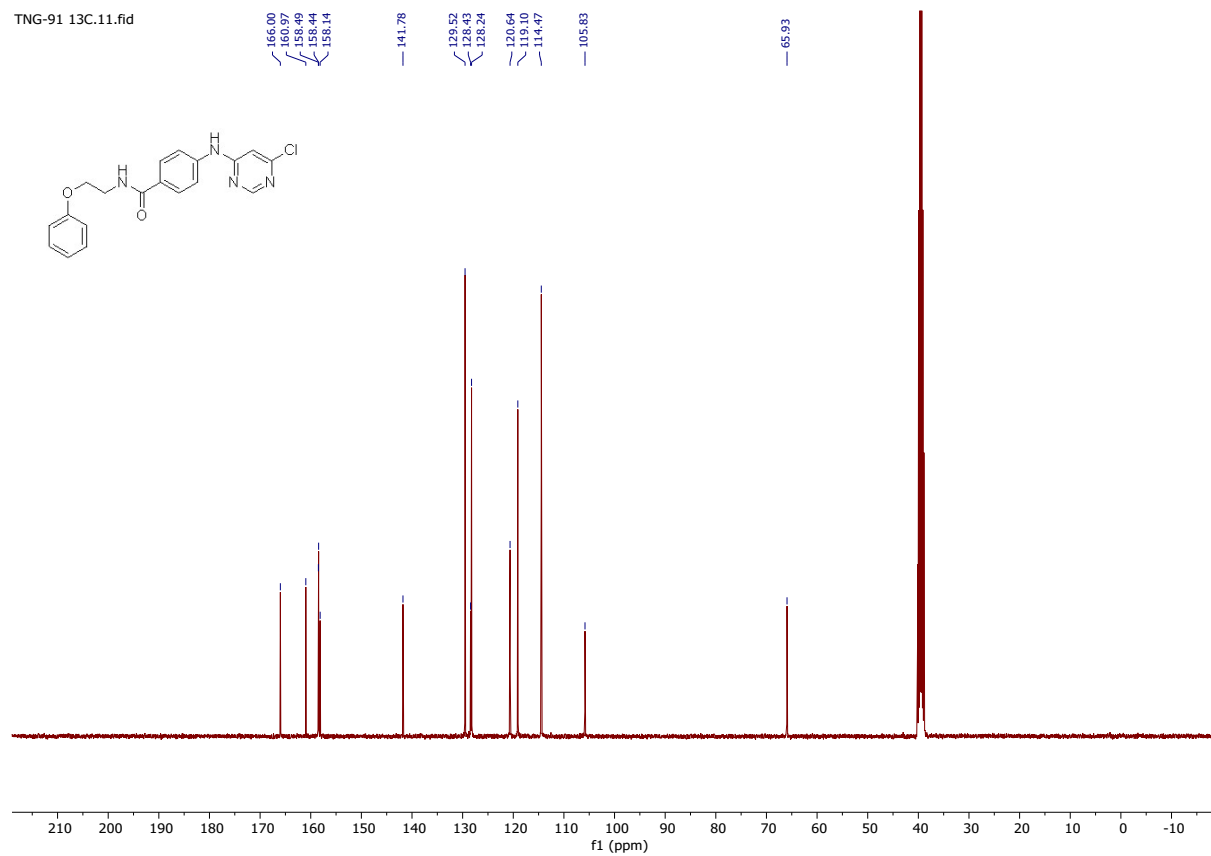

Compound **11a**  $^1\text{H}$  NMR (400 MHz,  $\text{DMSO-}d_6$ ):

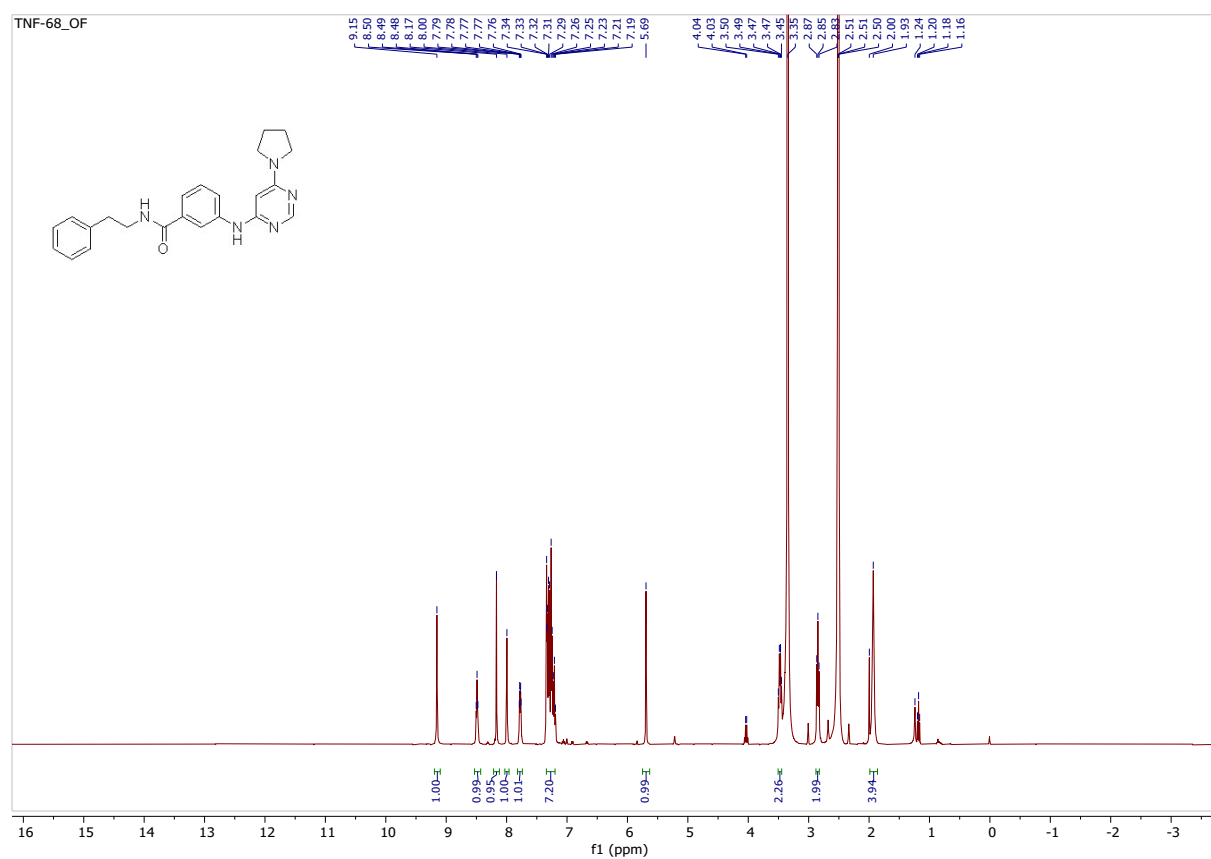

Compound **11a**  $^{13}\text{C}$  NMR (101 MHz,  $\text{DMSO-}d_6$ ):

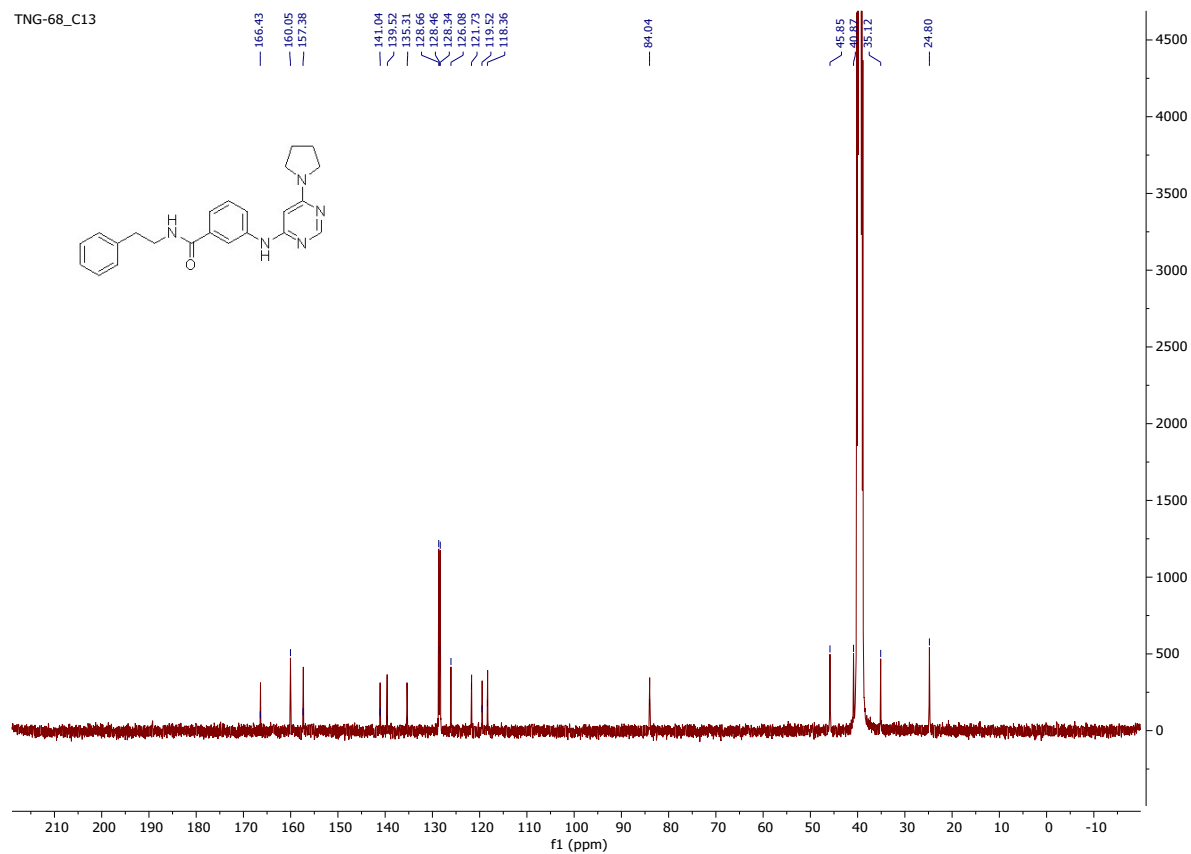

Compound **11b**  $^1\text{H}$  NMR (400 MHz,  $\text{DMSO-}d_6$ ):

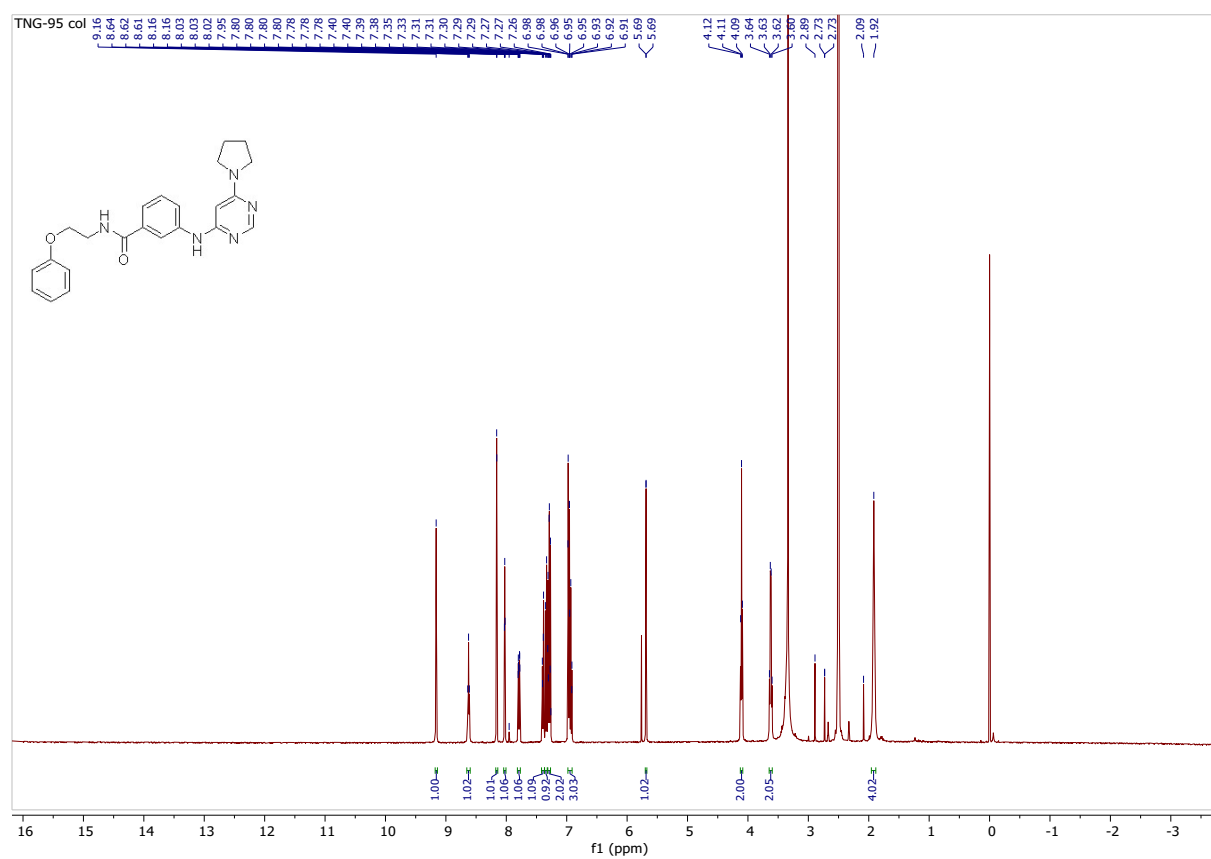

Compound **11b**  $^{13}\text{C}$  NMR (101 MHz,  $\text{DMSO-}d_6$ ):

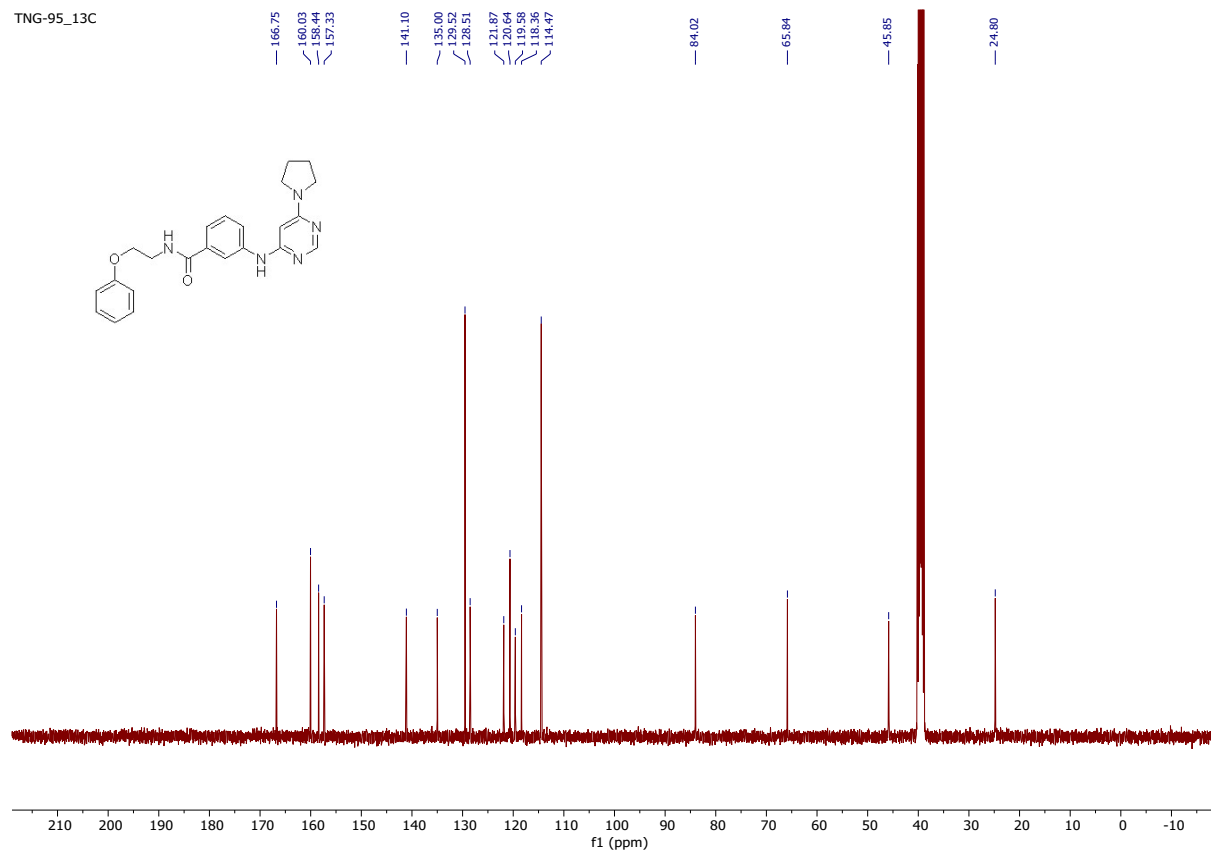

Compound **11c**  $^1\text{H}$  NMR (400 MHz,  $\text{DMSO-}d_6$ ):

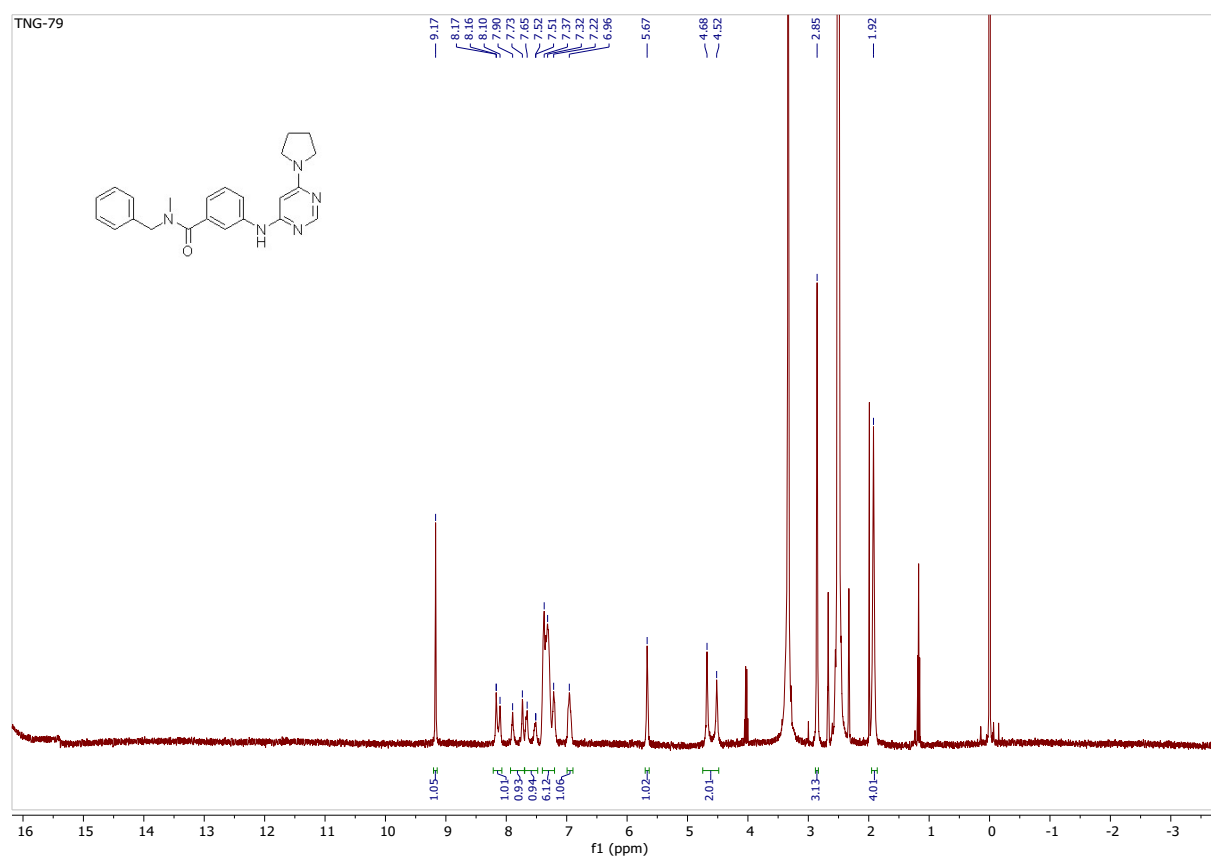

Compound **11c**  $^{13}\text{C}$  NMR (101 MHz,  $\text{DMSO-}d_6$ ):

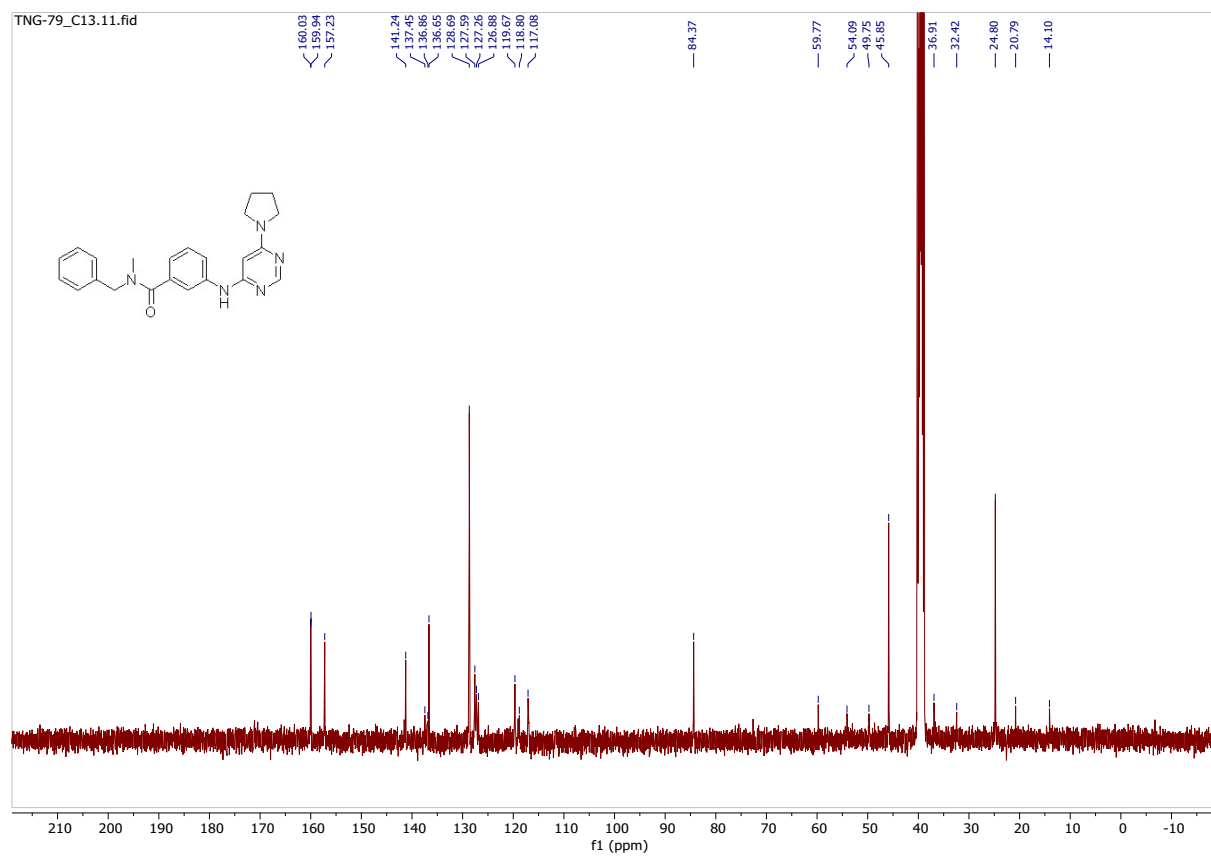

Compound **11d**  $^1\text{H}$  NMR (400 MHz,  $\text{DMSO-}d_6$ ):

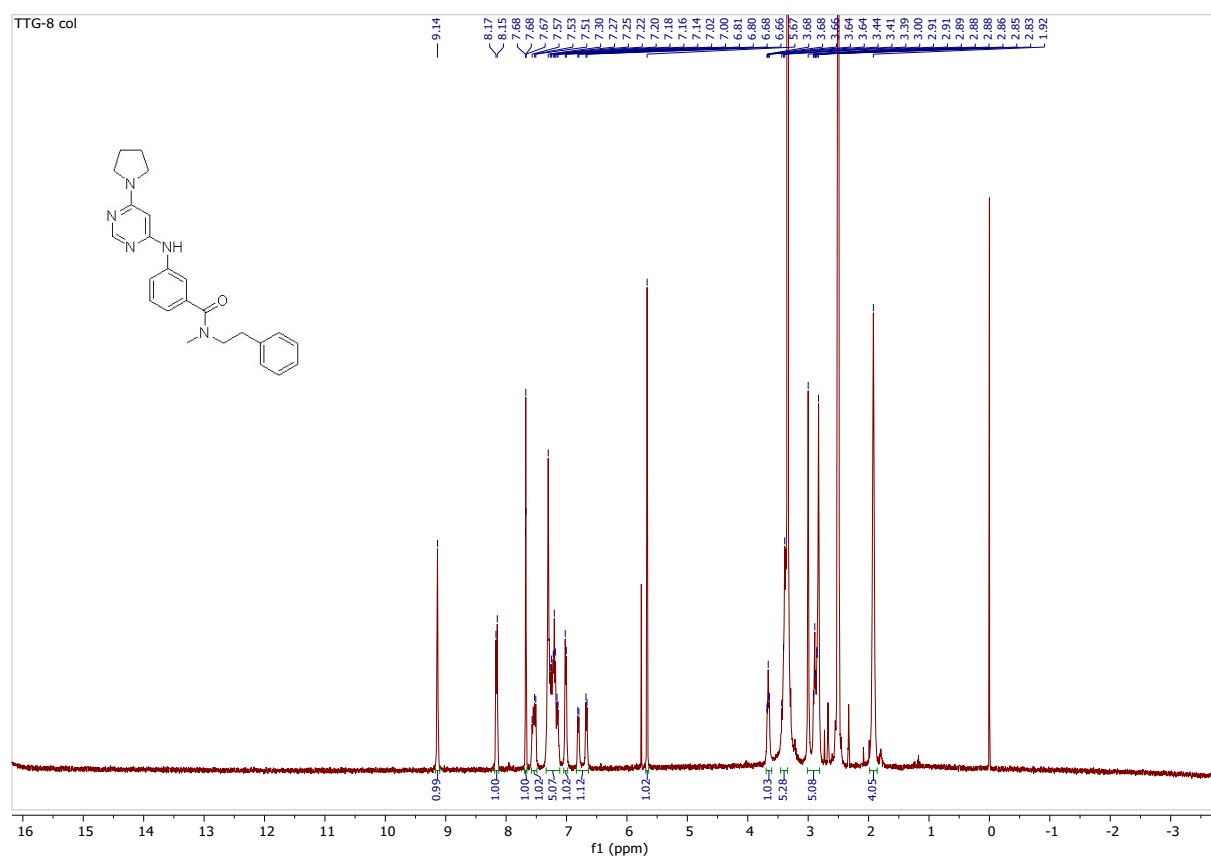

Compound **11d**  $^{13}\text{C}$  NMR (101 MHz,  $\text{DMSO-}d_6$ ):

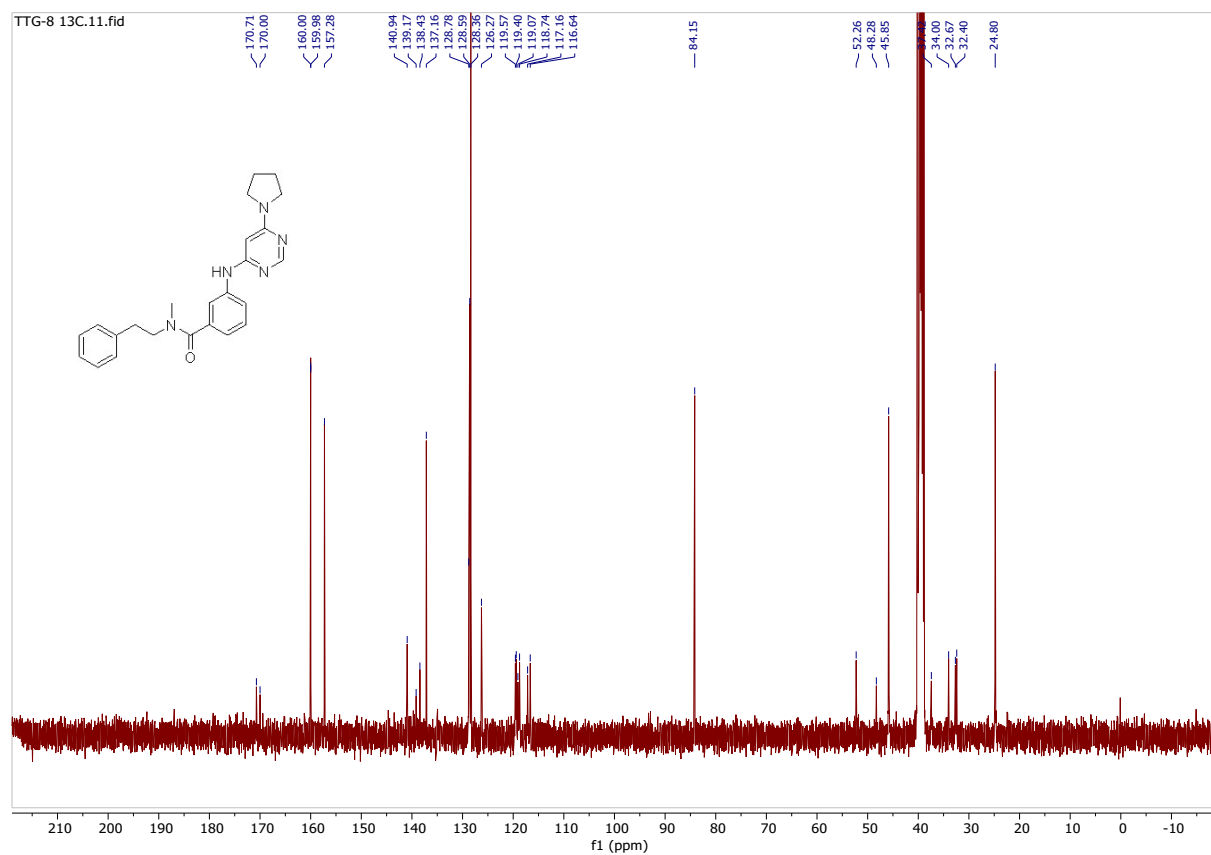



Compound **11e**  $^1\text{H}$  NMR (400 MHz,  $\text{DMSO-}d_6$ ):

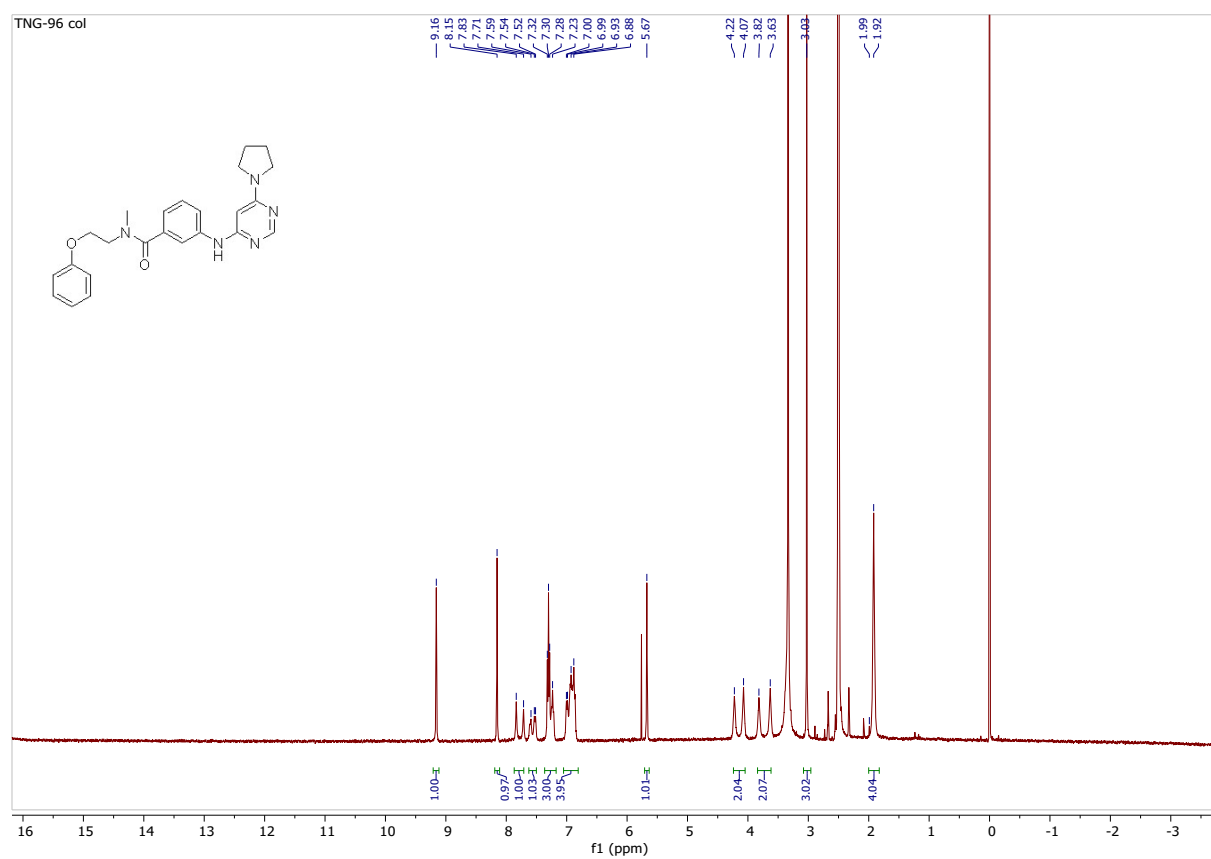

Compound **11e**  $^{13}\text{C}$  NMR (101 MHz,  $\text{DMSO-}d_6$ ):

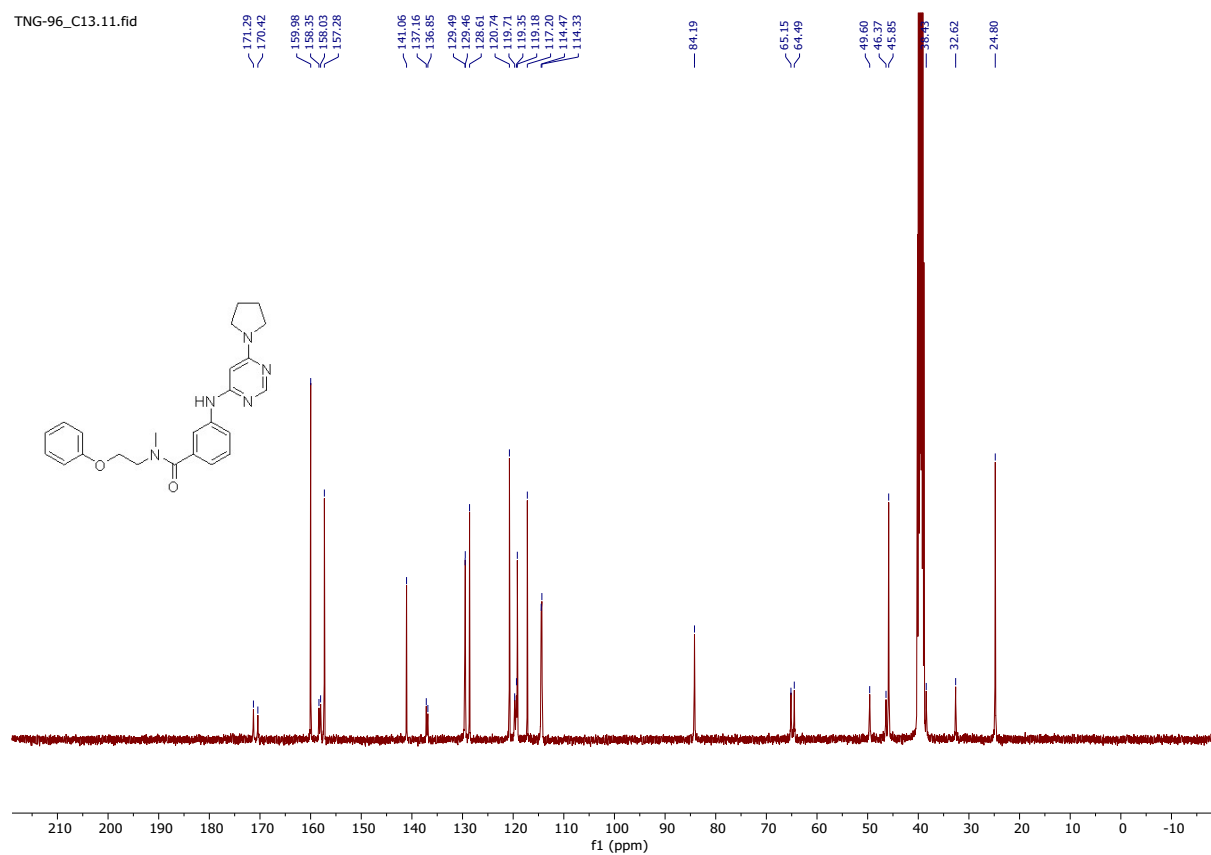

Compound **11f**  $^1\text{H}$  NMR (400 MHz,  $\text{DMSO-}d_6$ ):

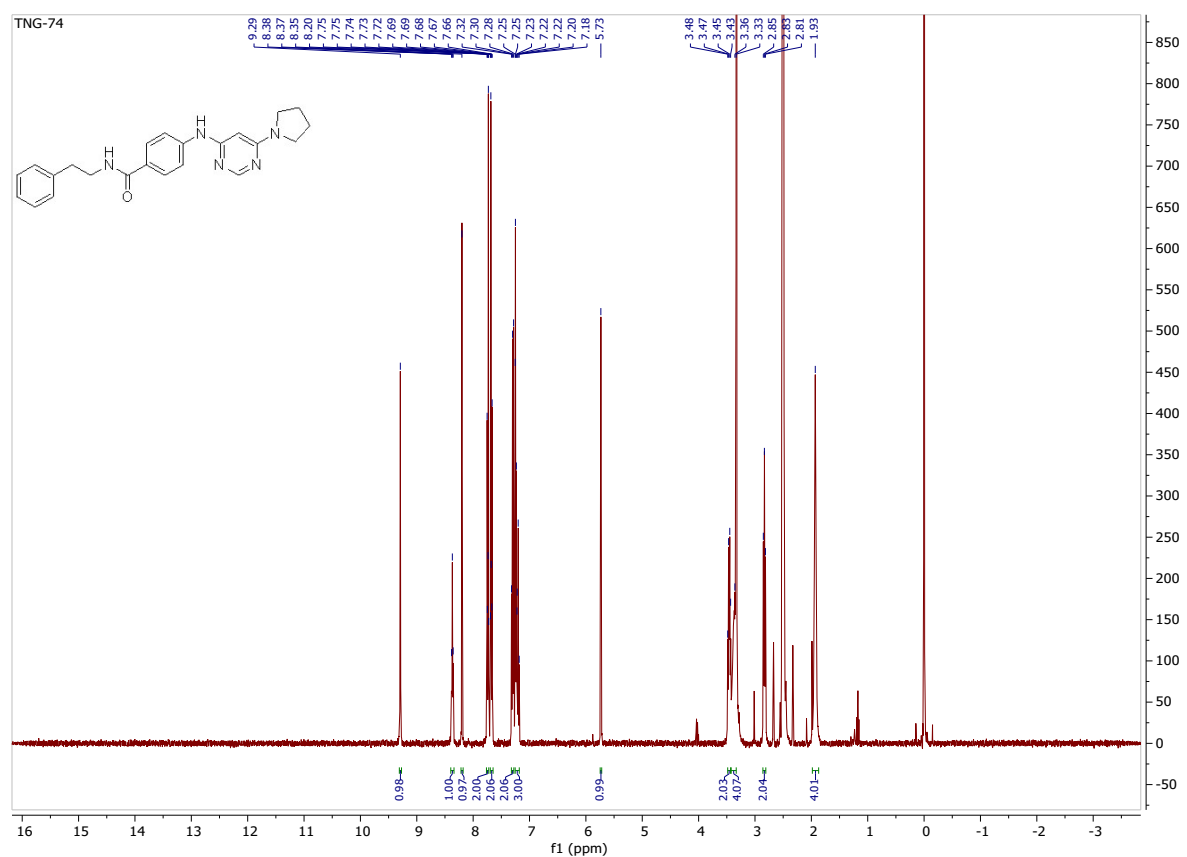

Compound **11f**  $^{13}\text{C}$  NMR (101 MHz,  $\text{DMSO-}d_6$ ):

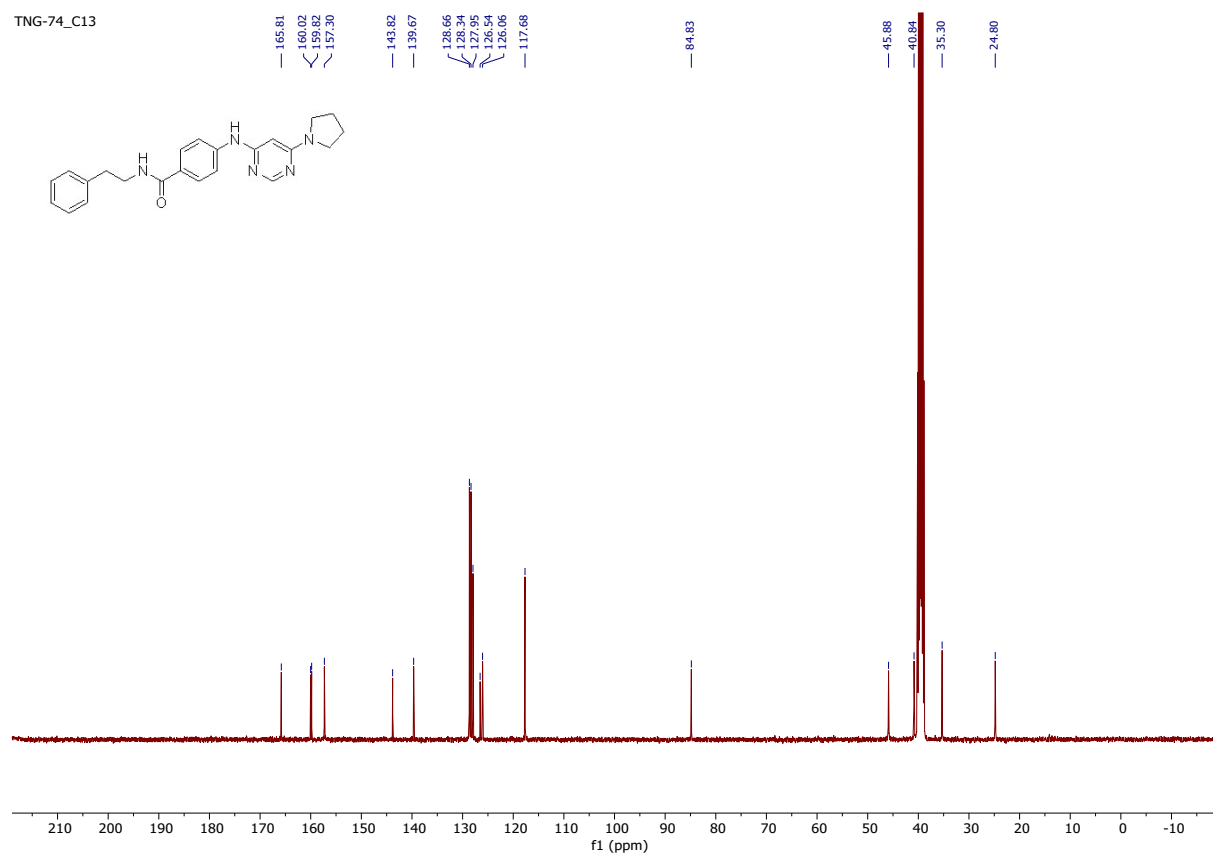

Compound **11g**  $^1\text{H}$  NMR (400 MHz,  $\text{DMSO}-d_6$ ):

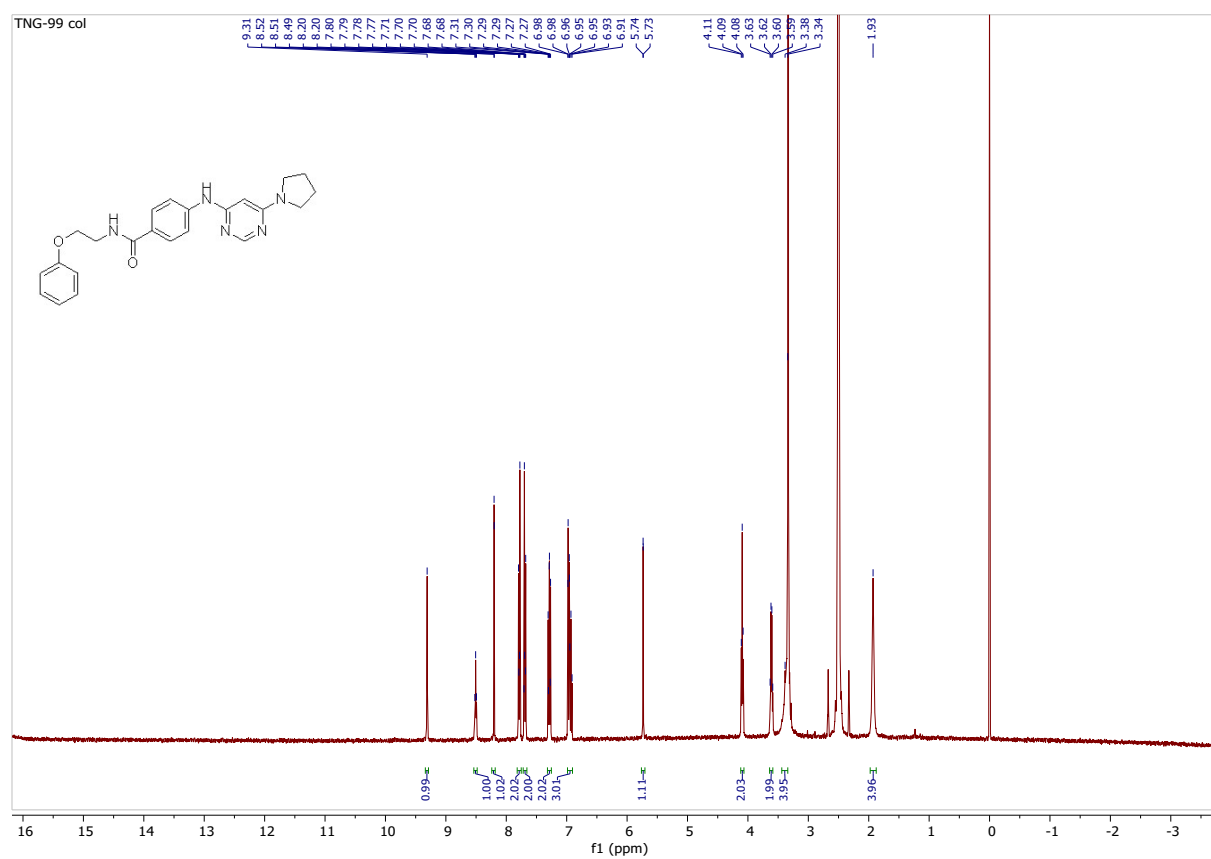

Compound **11g**  $^{13}\text{C}$  NMR (101 MHz,  $\text{DMSO}-d_6$ ):

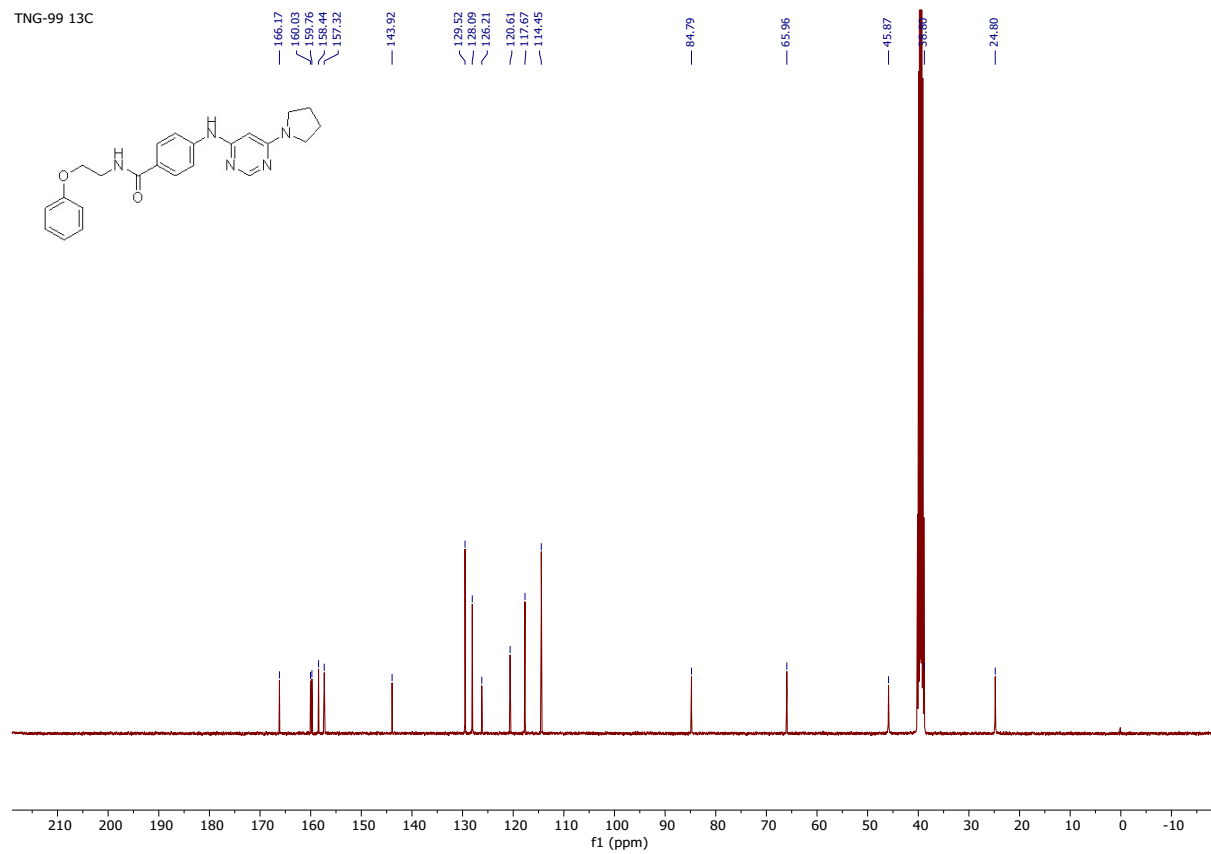

Compound **11h**  $^1\text{H}$  NMR (400 MHz,  $\text{DMSO-}d_6$ ):

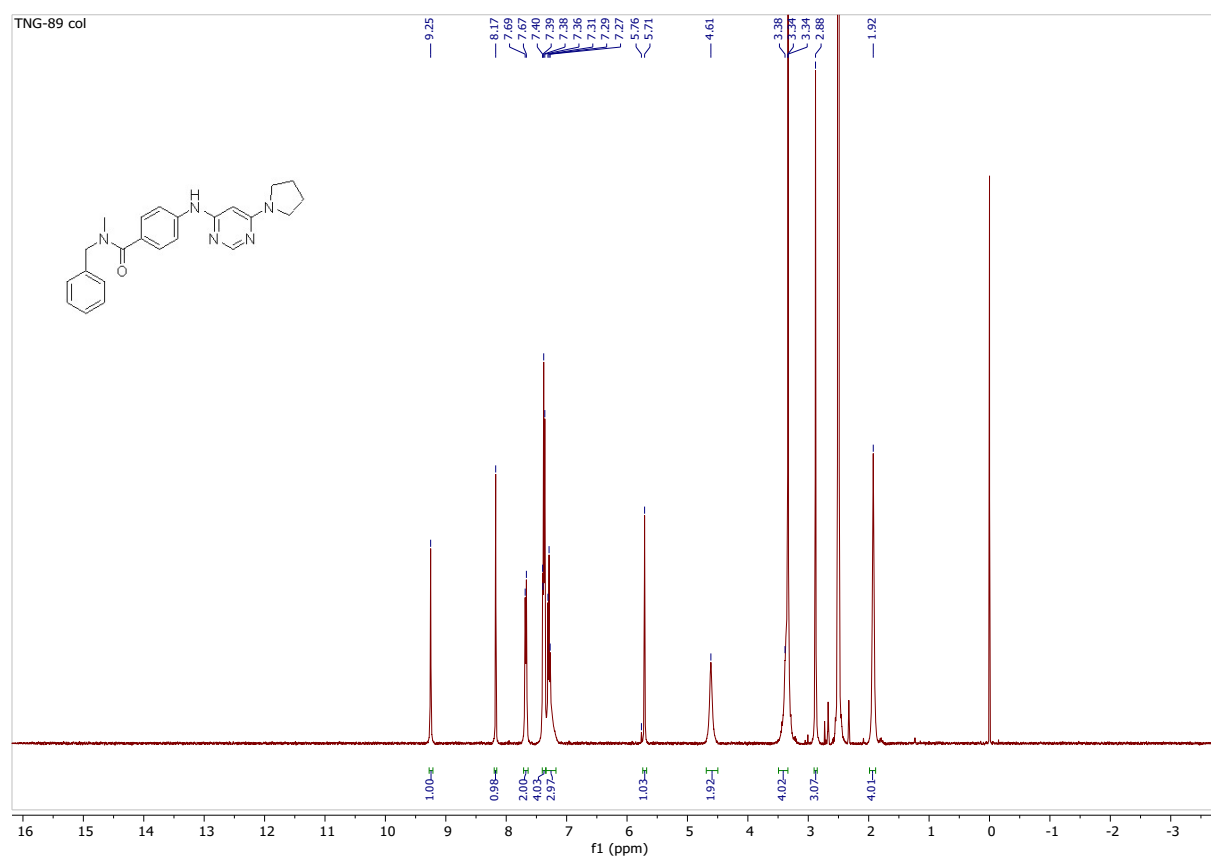

Compound **11h**  $^{13}\text{C}$  NMR (101 MHz,  $\text{DMSO-}d_6$ ):

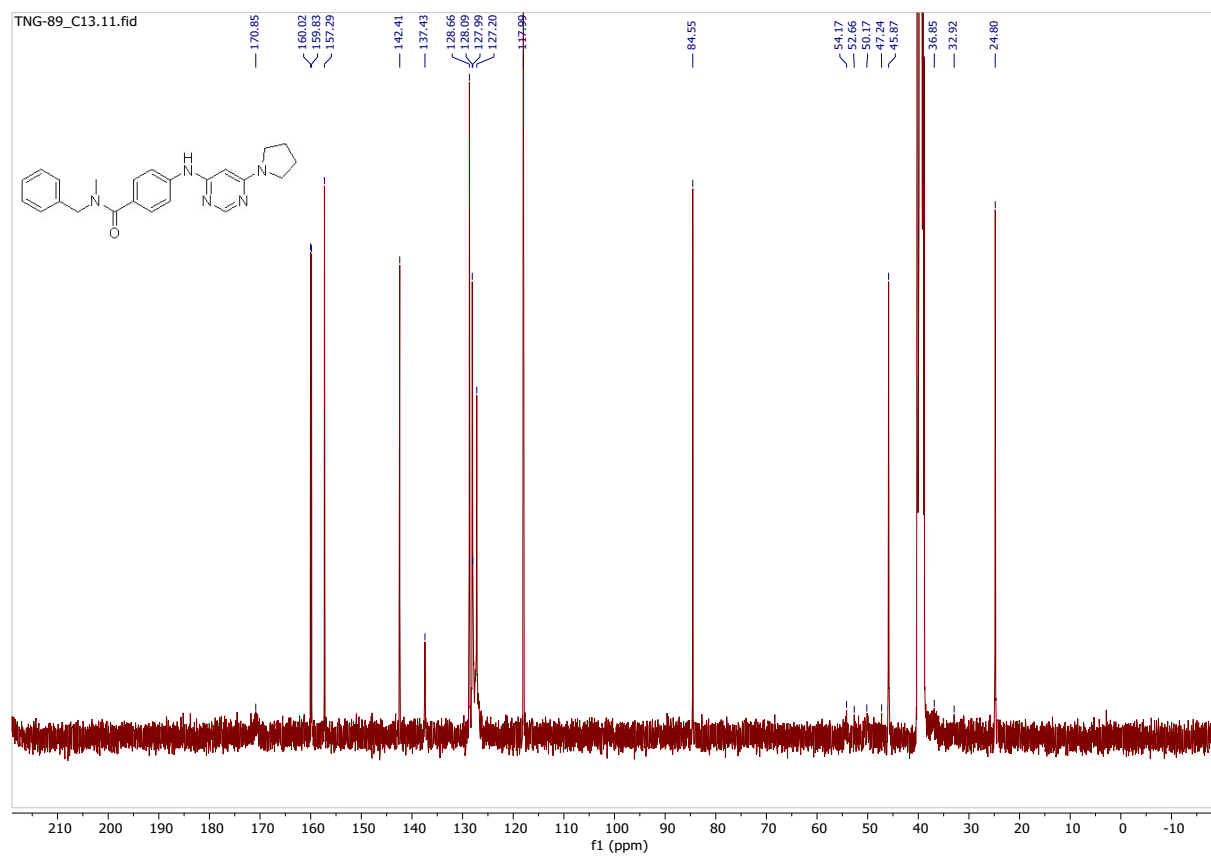

Compound **11i**  $^1\text{H}$  NMR (400 MHz,  $\text{DMSO-}d_6$ ):

TTG-10 ob.10.fid

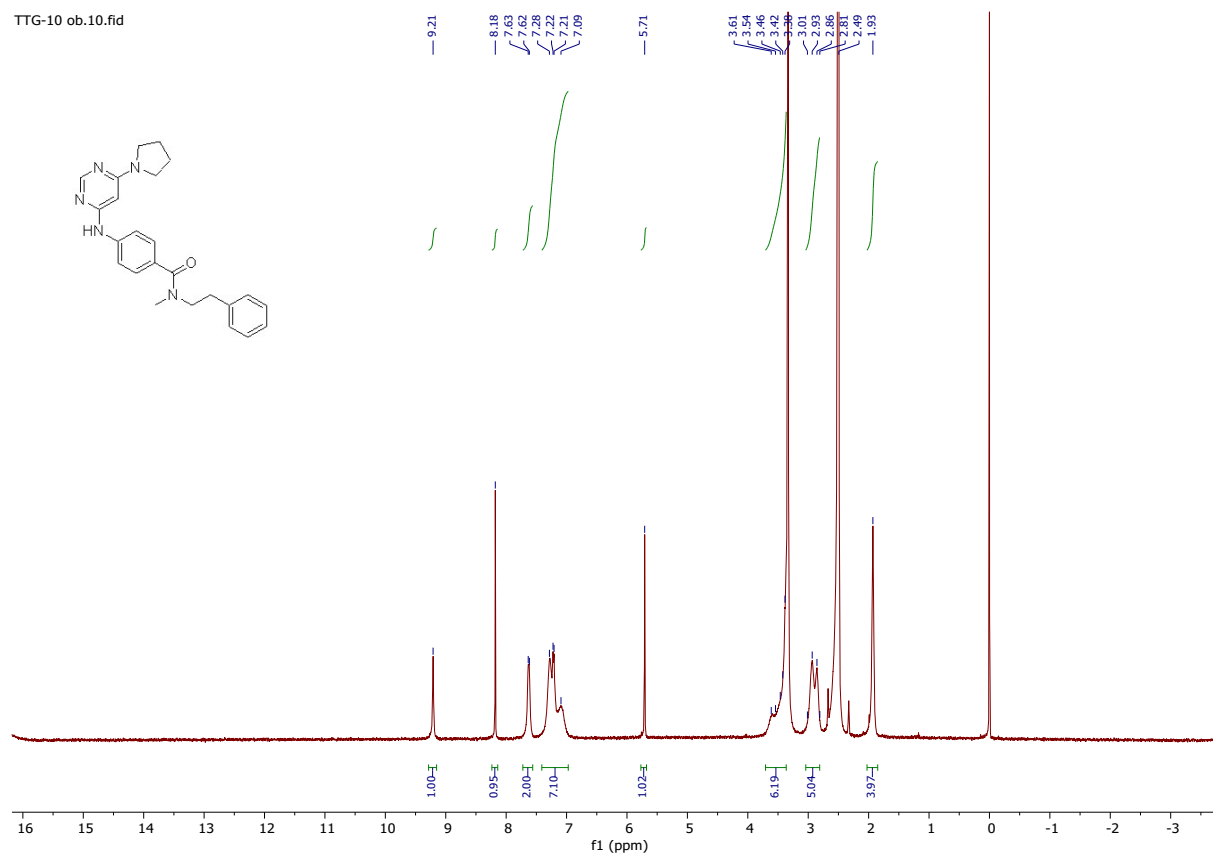

Compound **11i**  $^{13}\text{C}$  NMR (101 MHz,  $\text{DMSO-}d_6$ ):

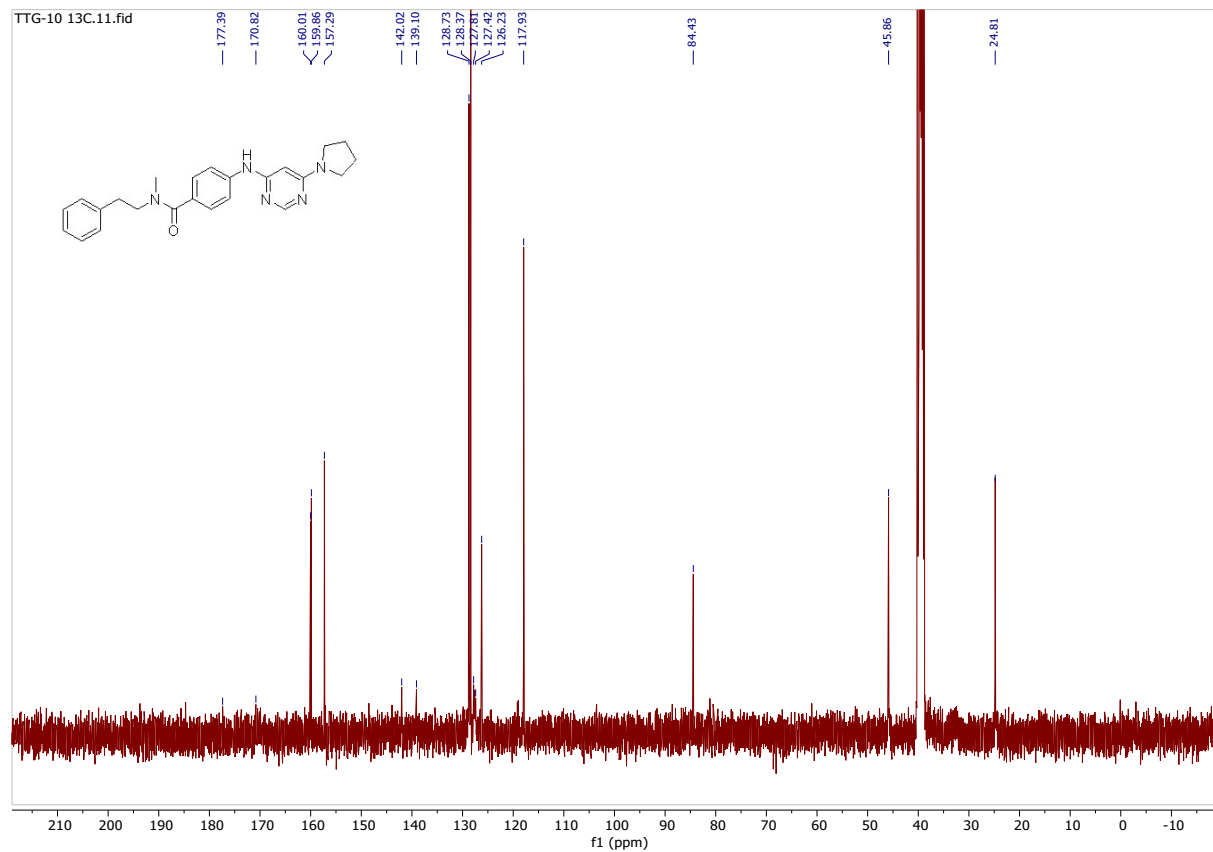

Compound **11j**  $^1\text{H}$  NMR (400 MHz,  $\text{DMSO}-d_6$ ):

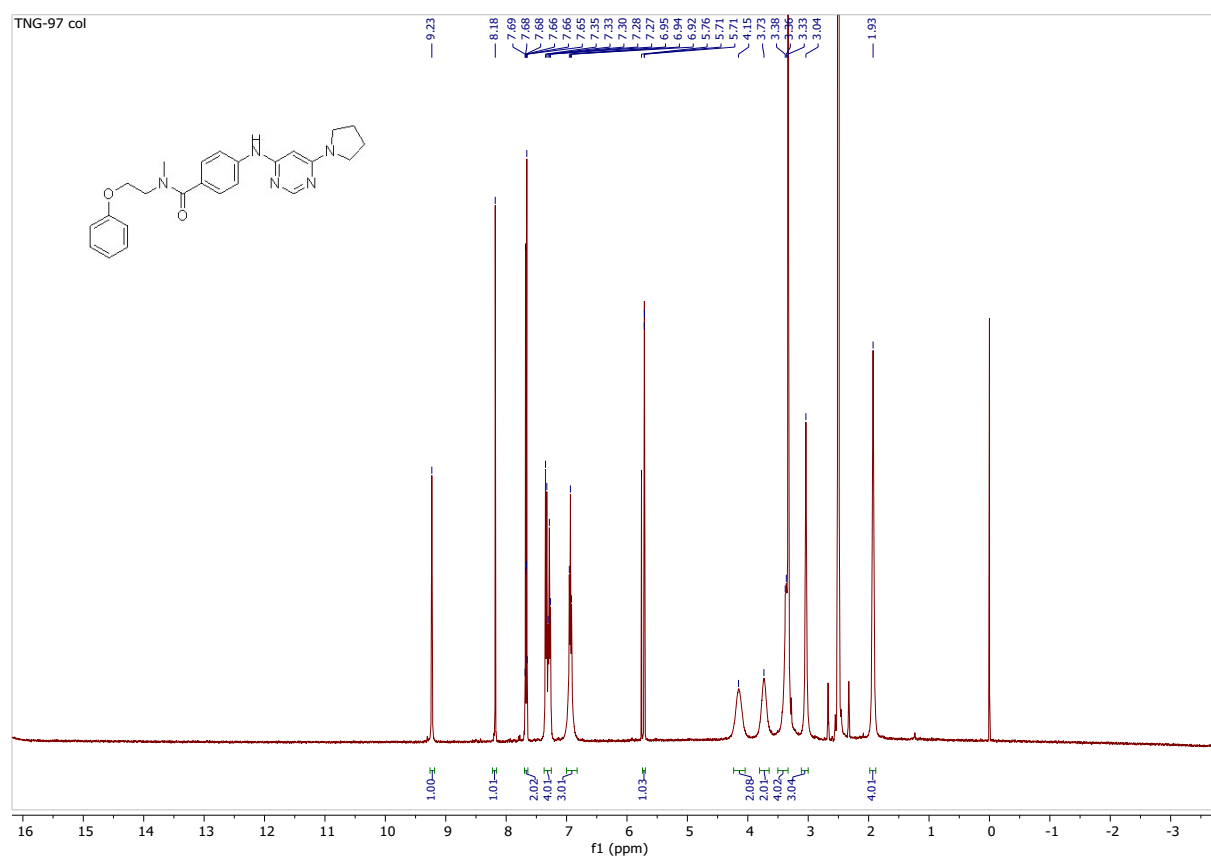

Compound **11j**  $^{13}\text{C}$  NMR (101 MHz,  $\text{DMSO}-d_6$ ):

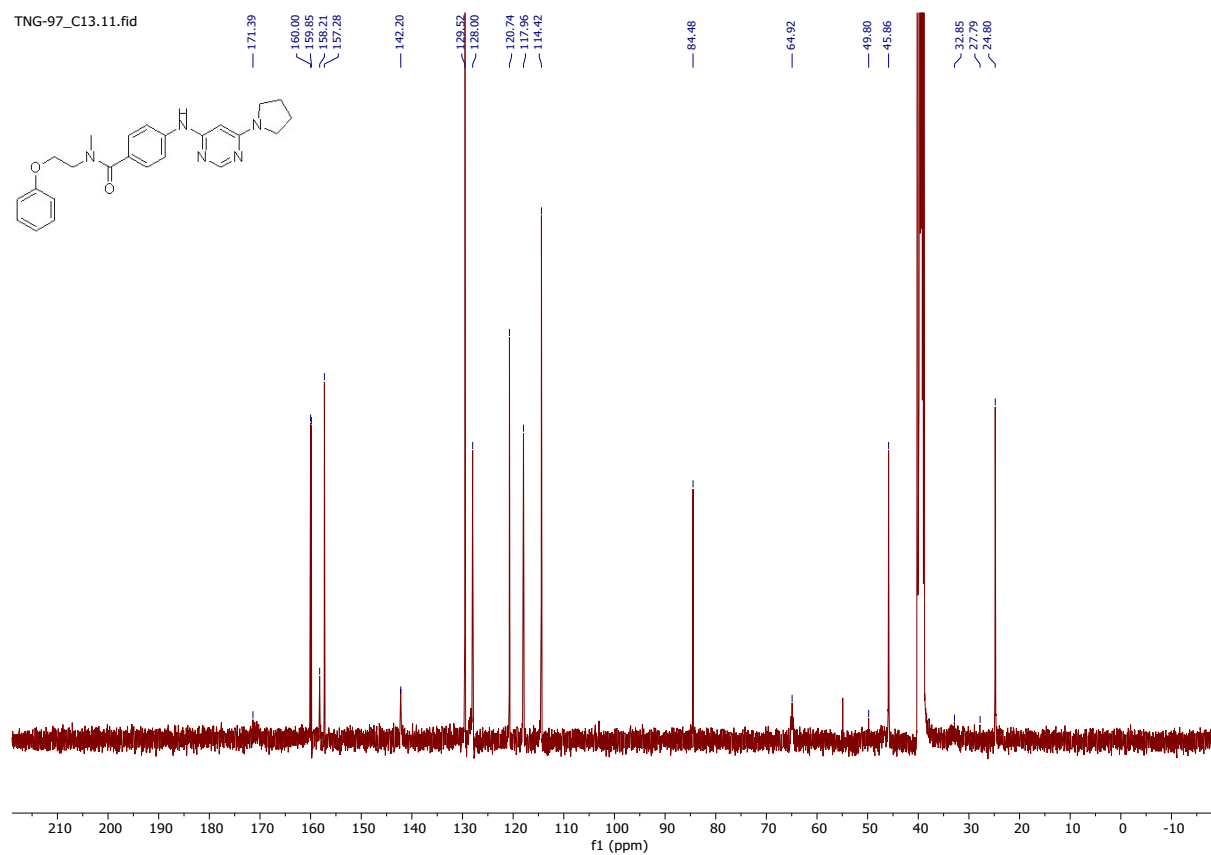

Compound **12g**  $^1\text{H}$  NMR (400 MHz,  $\text{DMSO-}d_6$ ):

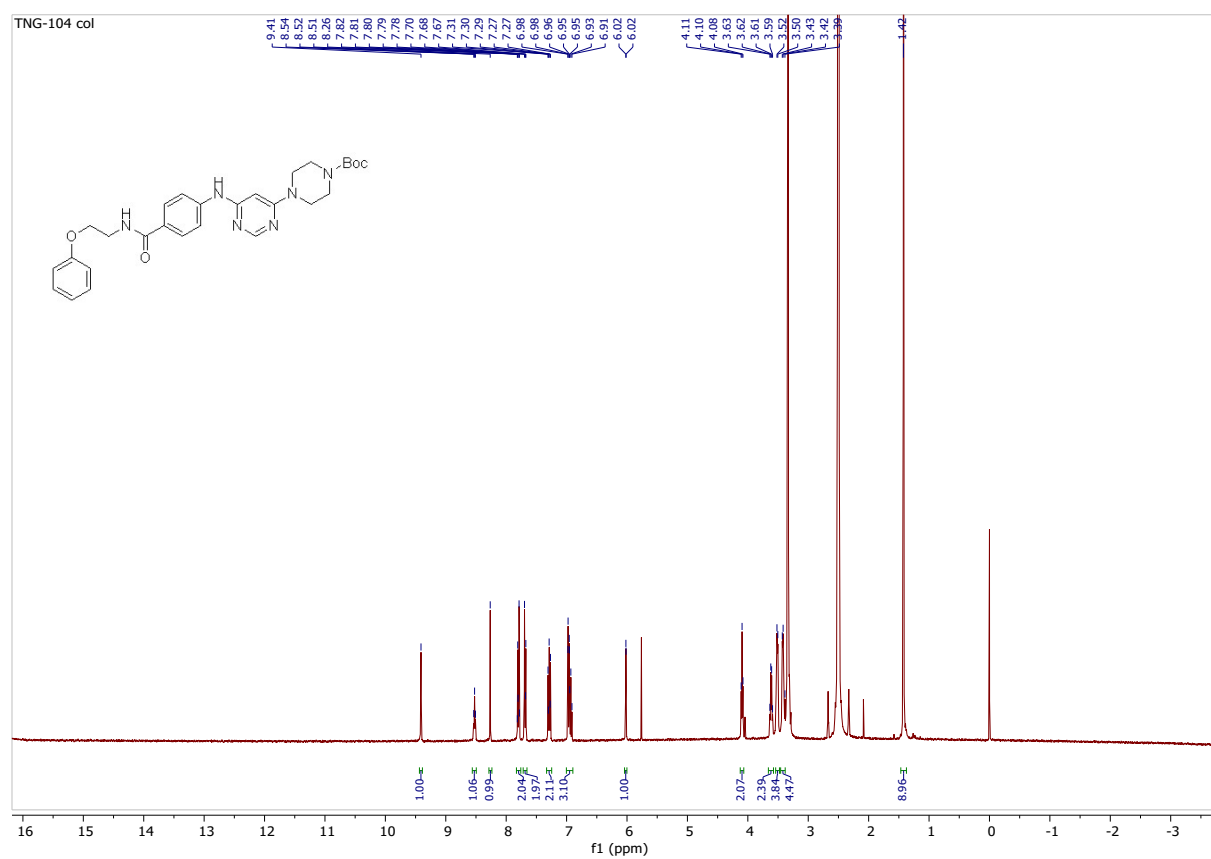

Compound **12g**  $^{13}\text{C}$  NMR (101 MHz,  $\text{DMSO-}d_6$ ):

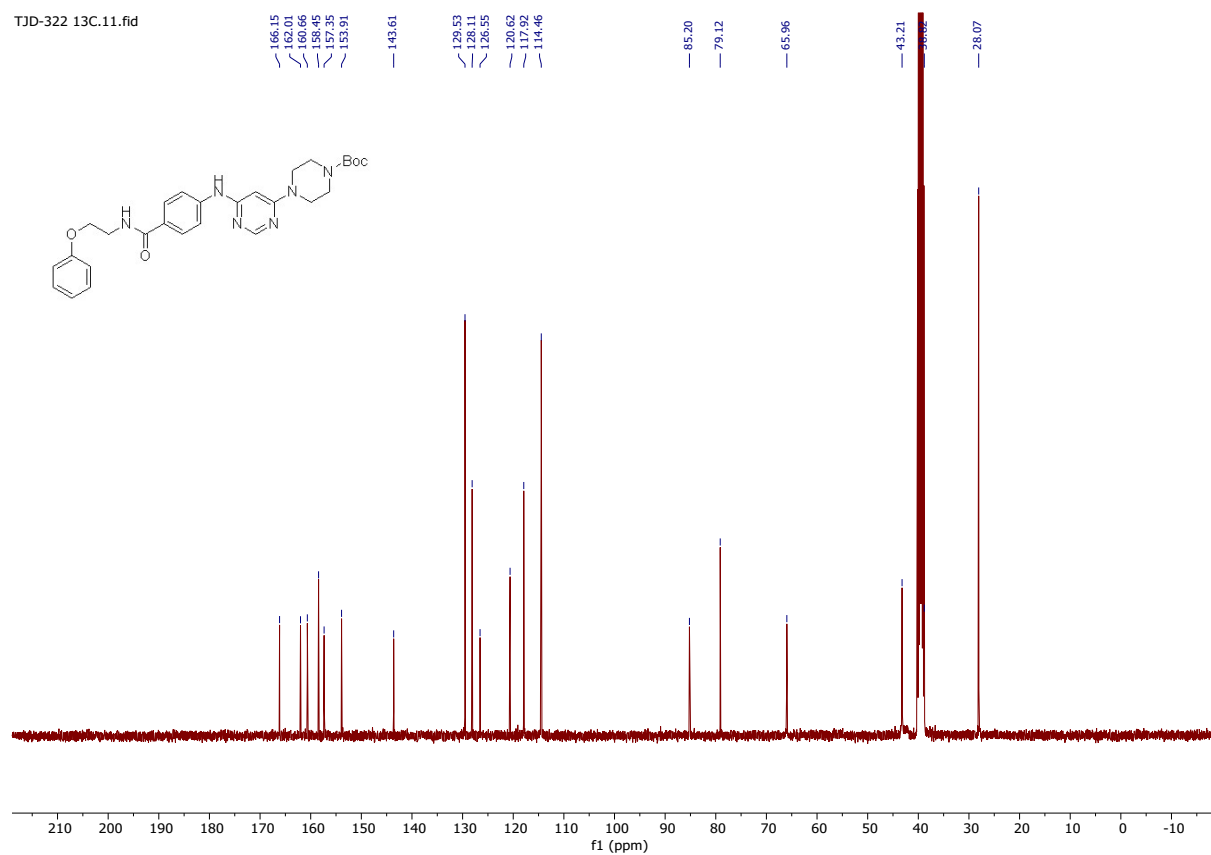

Compound **13a**  $^1\text{H}$  NMR (400 MHz,  $\text{DMSO-}d_6$ ):

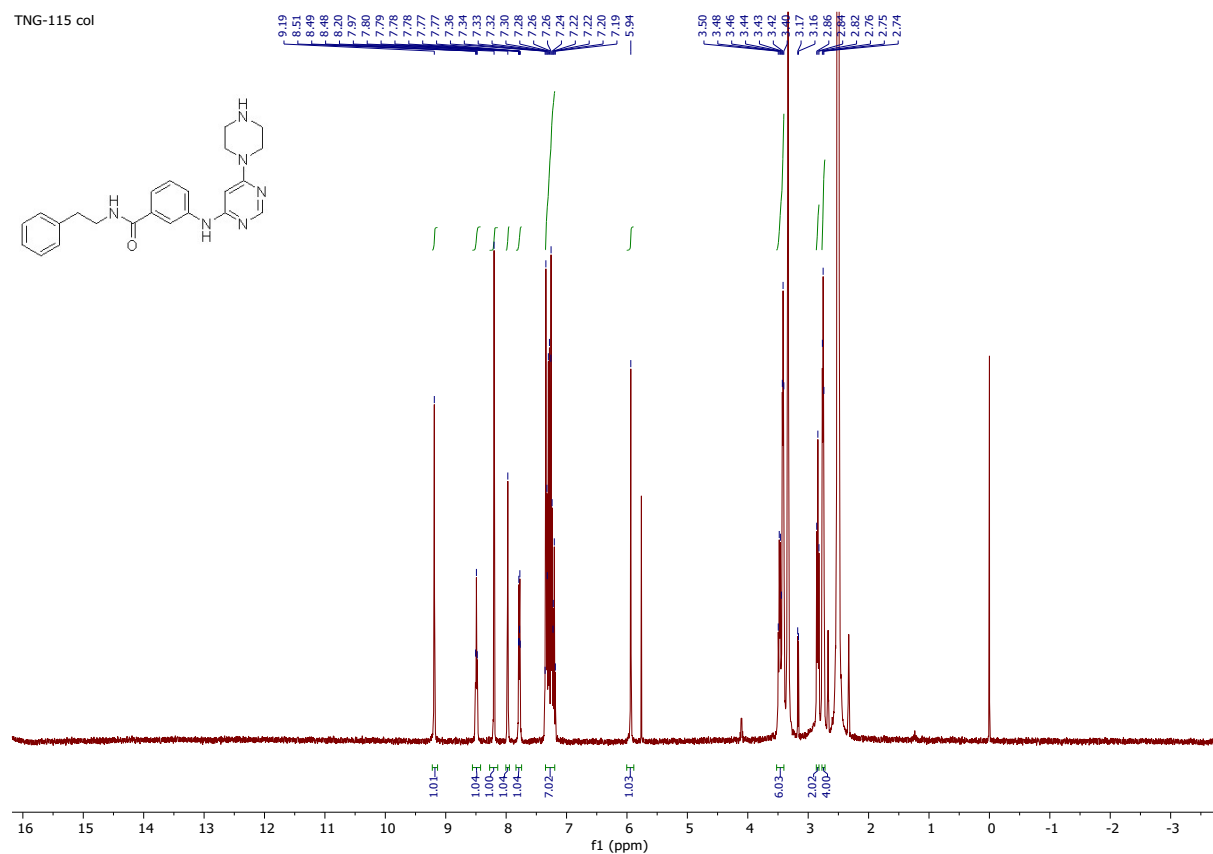

Compound **13a**  $^{13}\text{C}$  NMR (101 MHz,  $\text{DMSO-}d_6$ ):

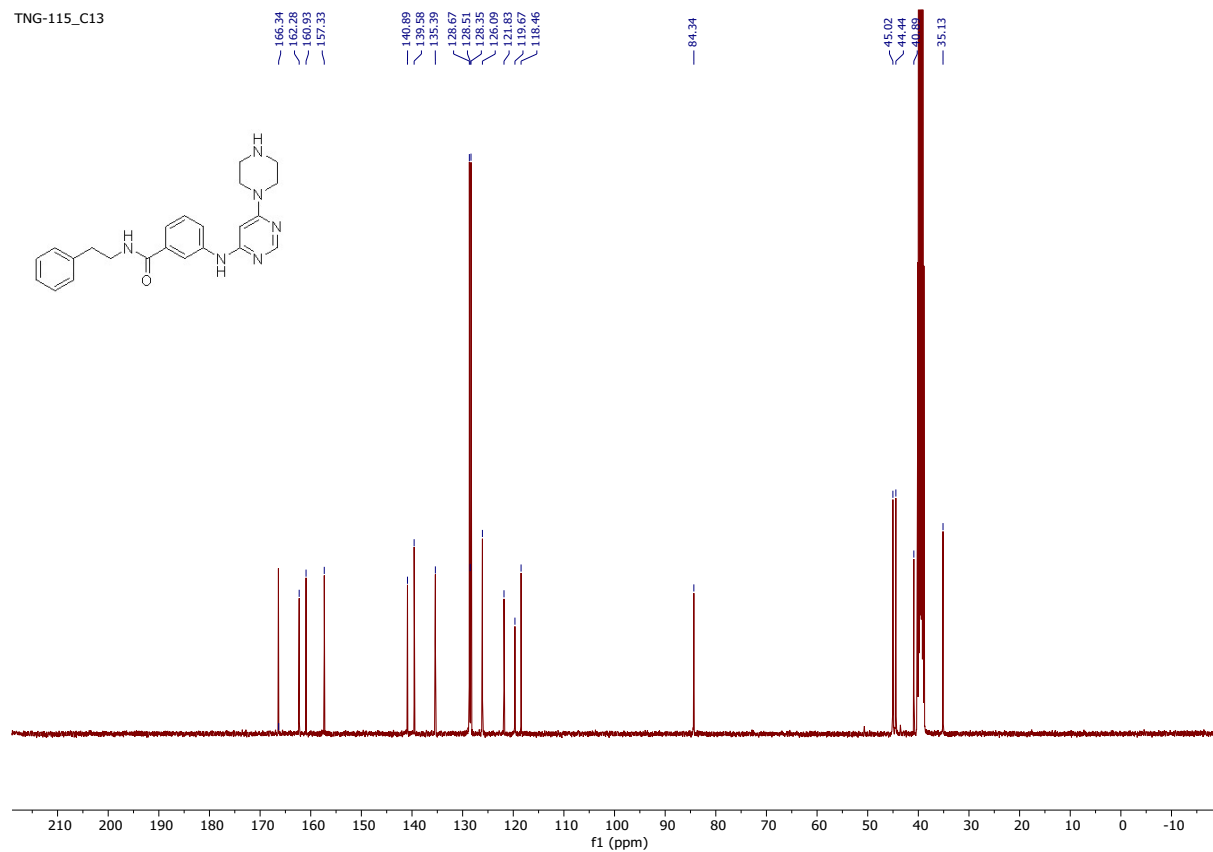



Compound **13b** <sup>1</sup>H NMR (400 MHz, DMSO-*d*<sub>6</sub>):

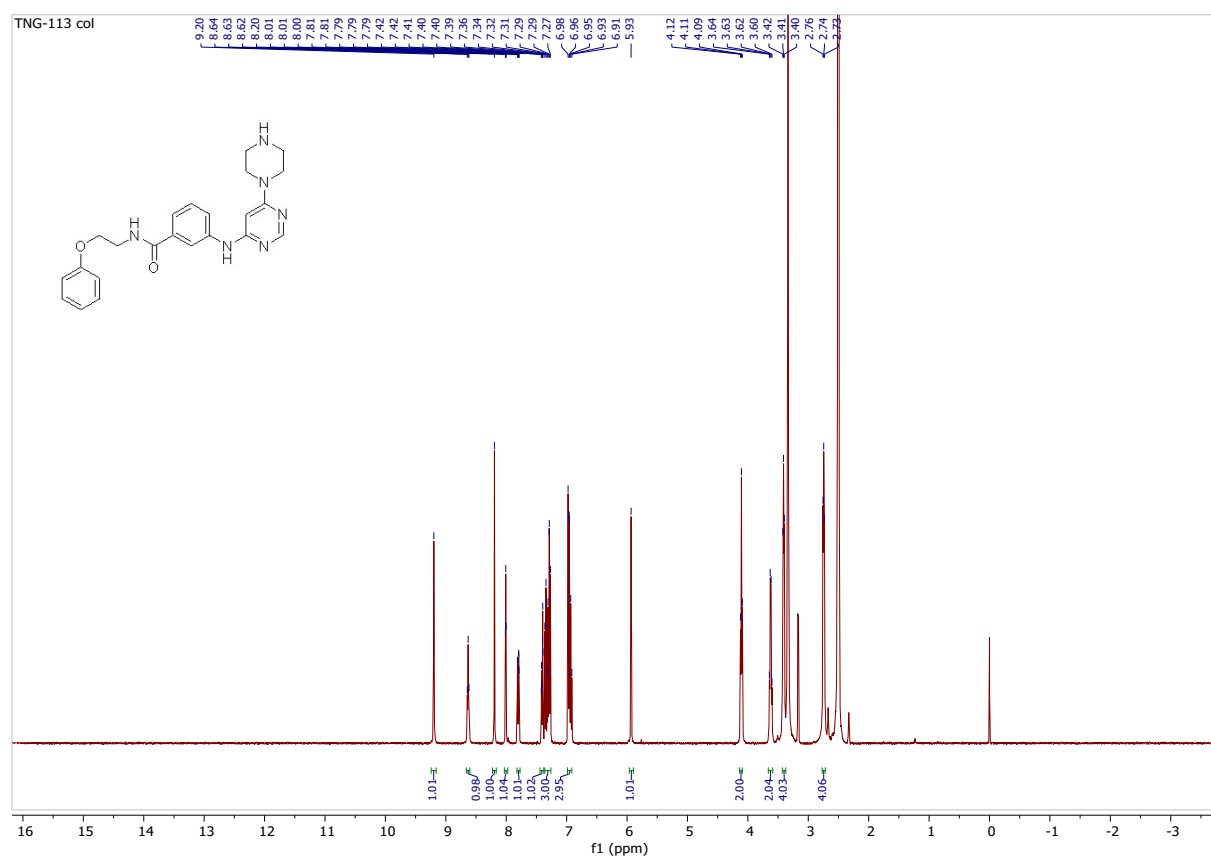

Compound **13b** <sup>13</sup>C NMR (101 MHz, DMSO-*d*<sub>6</sub>):

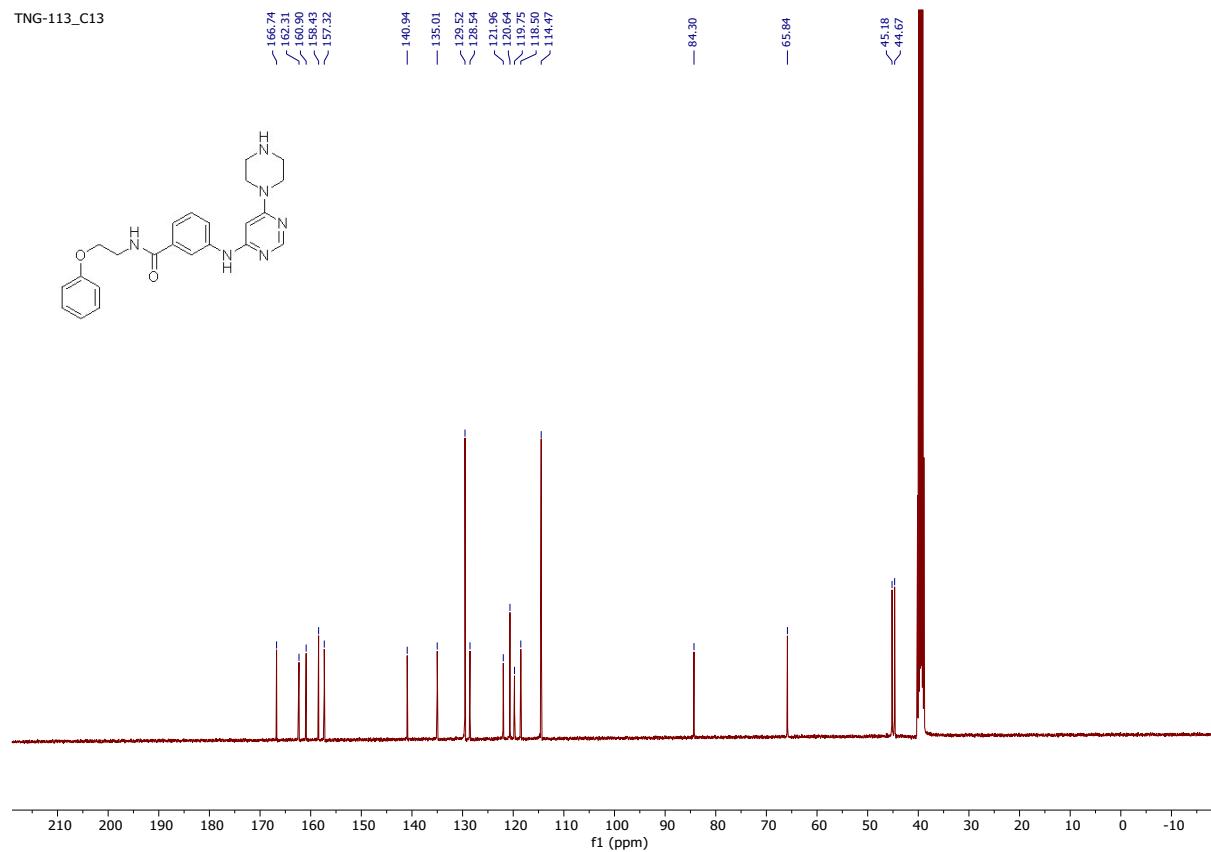

Compound **13c**  $^1\text{H}$  NMR (400 MHz,  $\text{DMSO-}d_6$ ):

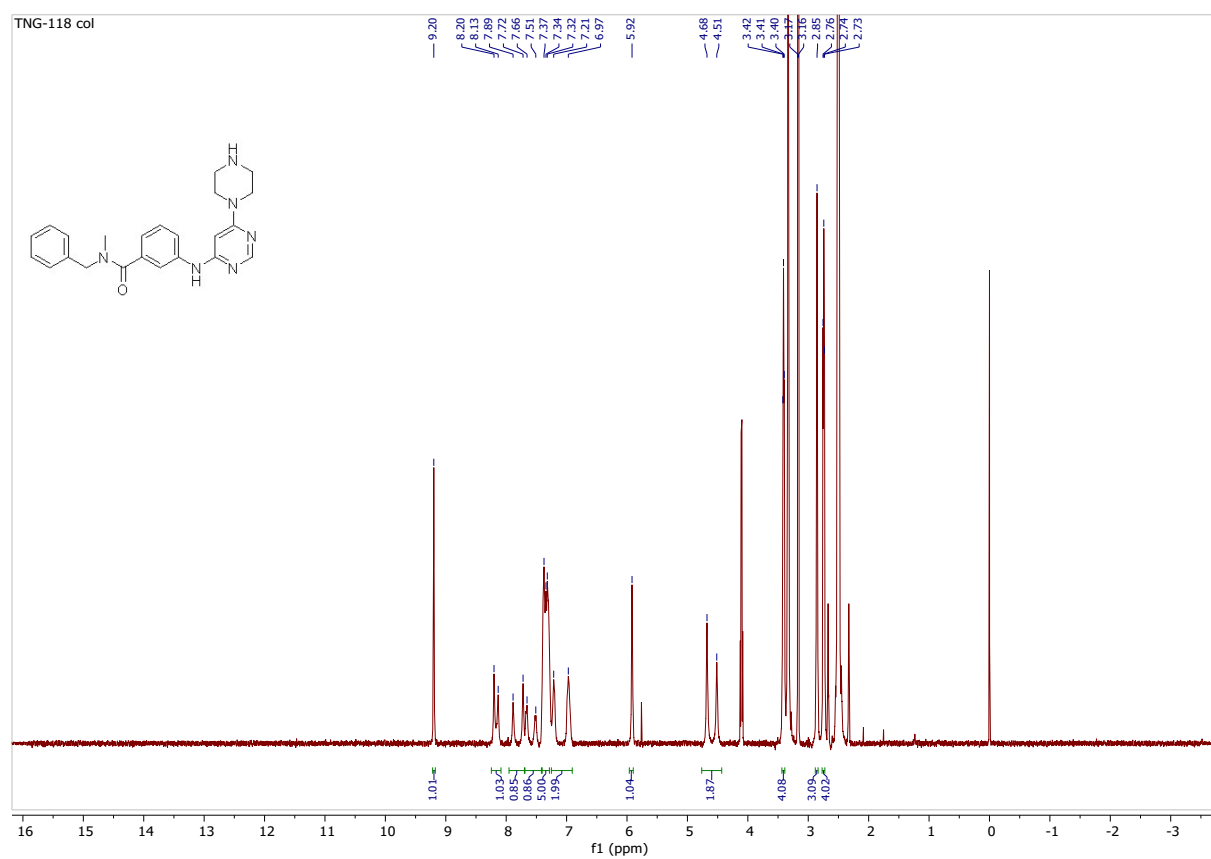

Compound **13c**  $^{13}\text{C}$  NMR (101 MHz,  $\text{DMSO-}d_6$ ):

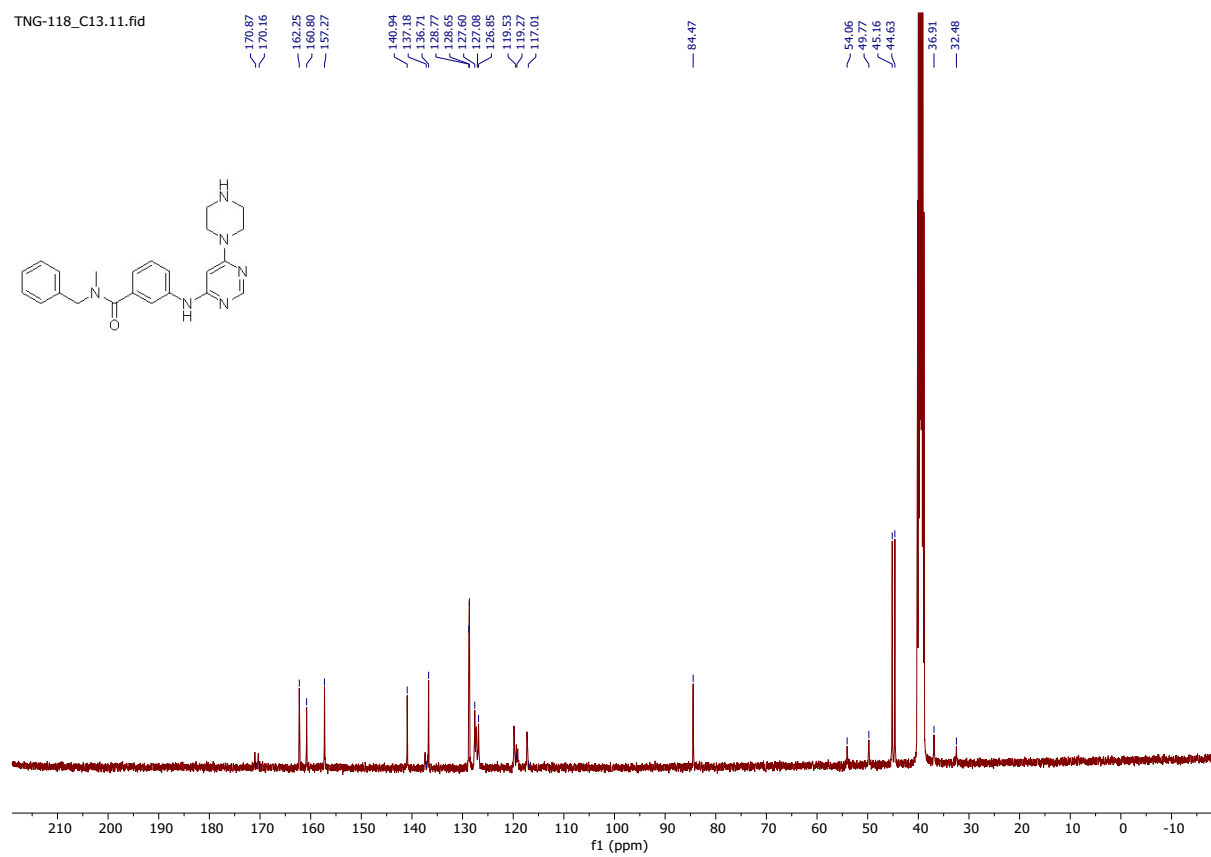

Compound **13d**  $^1\text{H}$  NMR (400 MHz,  $\text{DMSO-}d_6$ ):

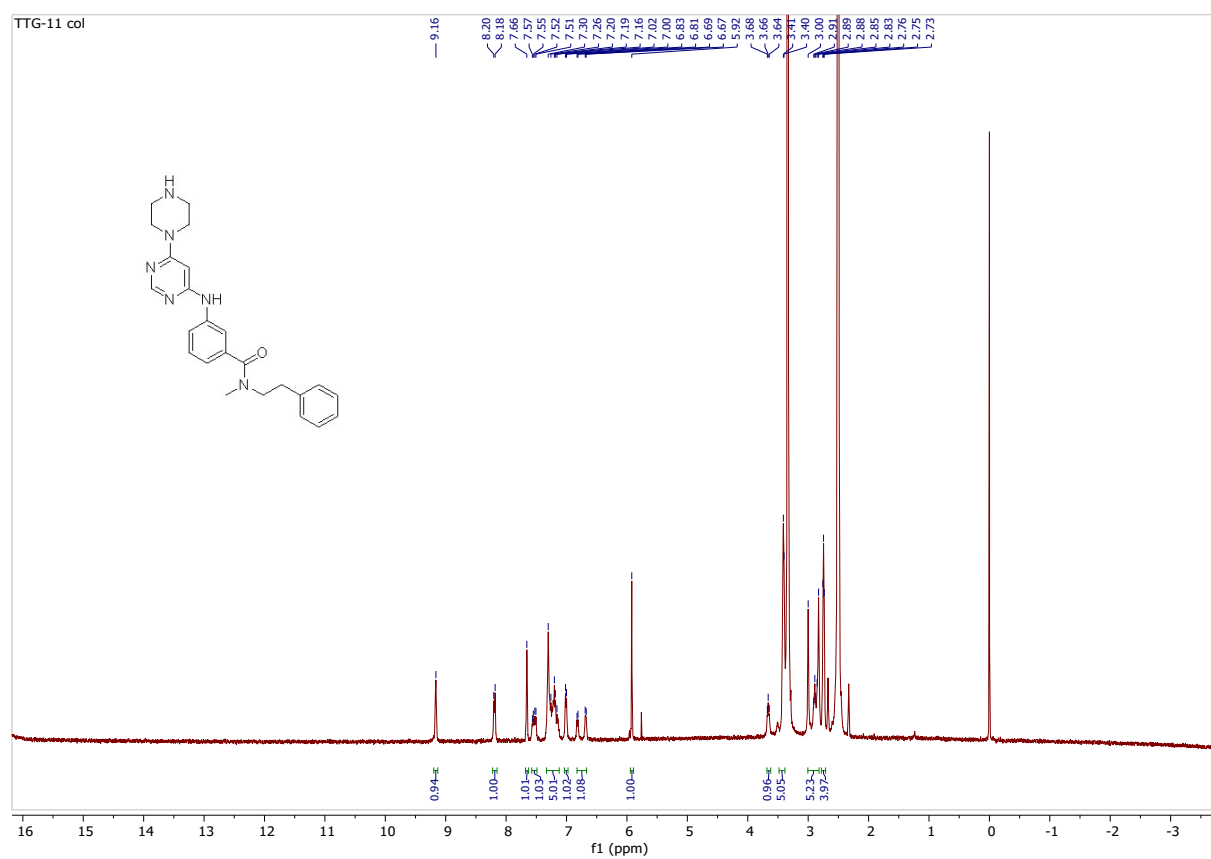

Compound **13d**  $^{13}\text{C}$  NMR (101 MHz,  $\text{DMSO-}d_6$ ):

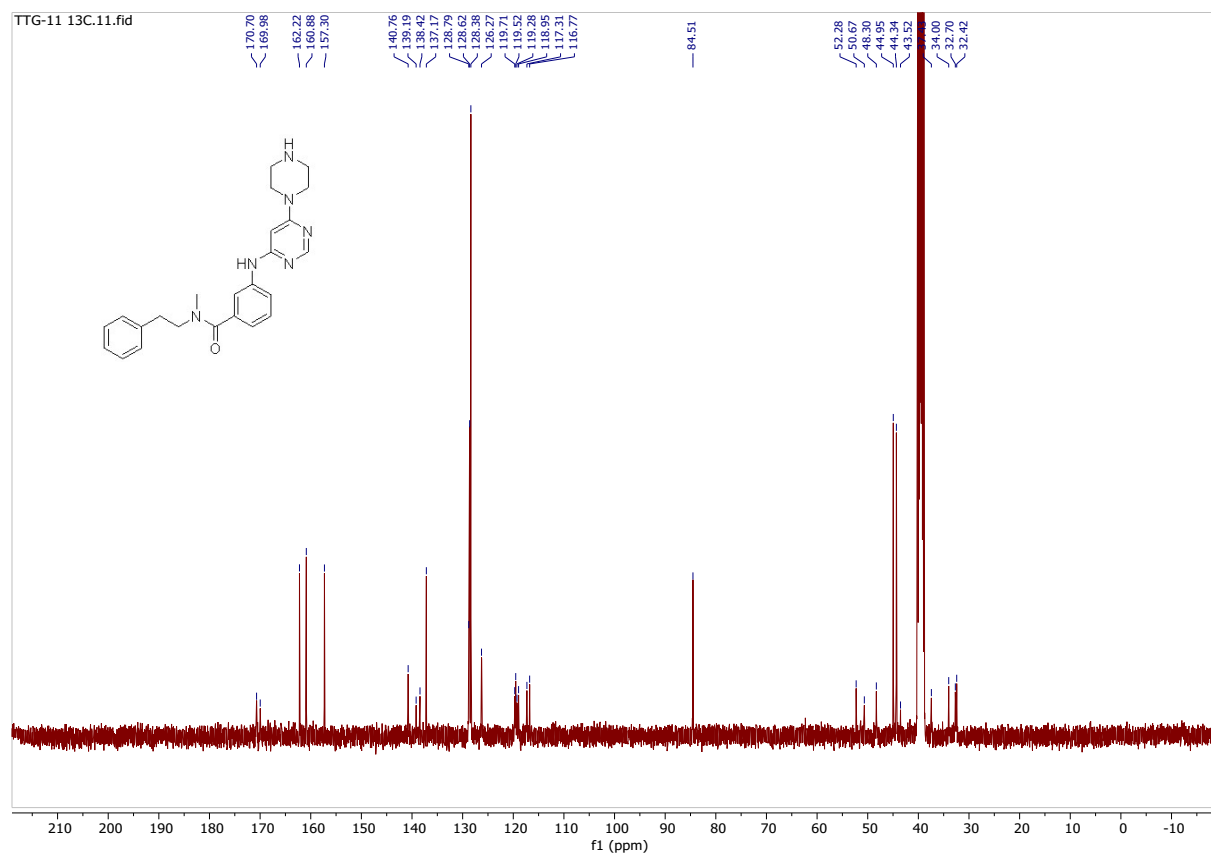

Compound **13e**  $^1\text{H}$  NMR (400 MHz,  $\text{DMSO-}d_6$ ):

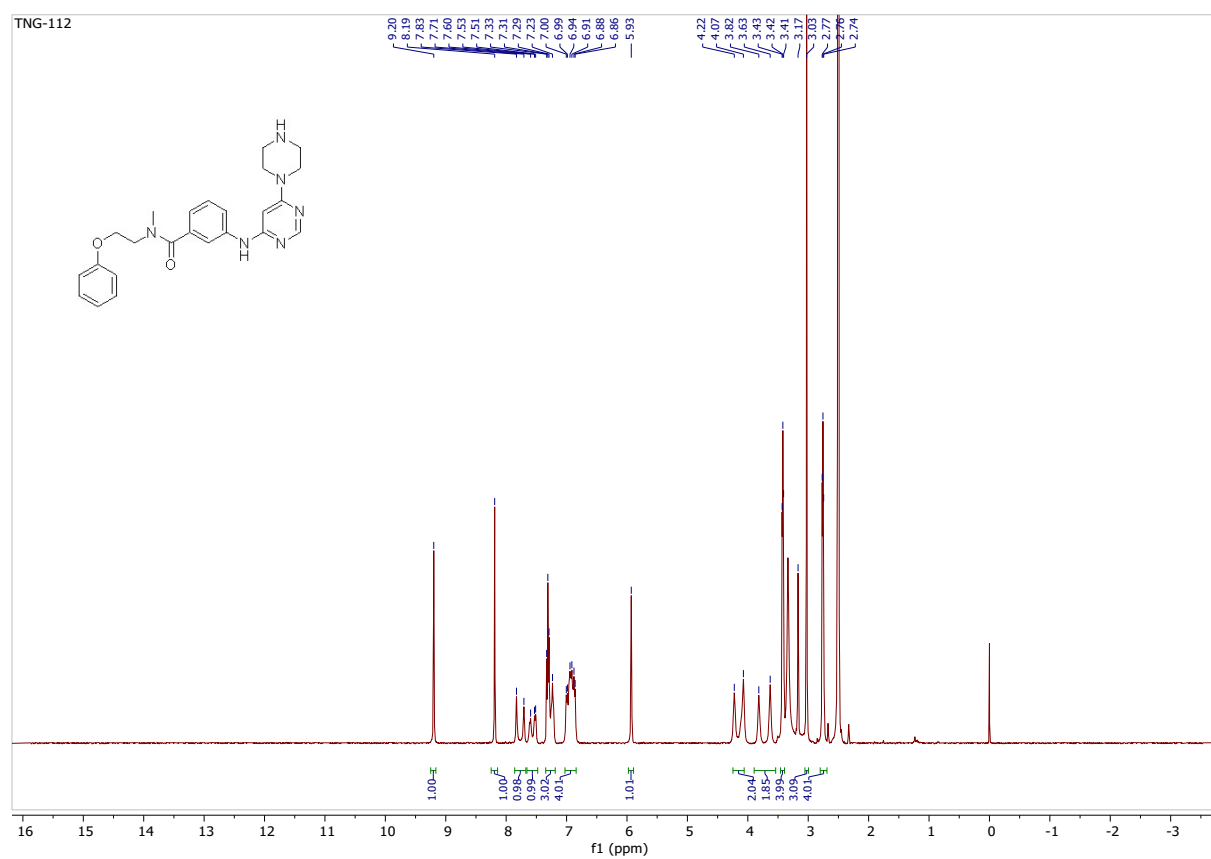

Compound **13e**  $^{13}\text{C}$  NMR (101 MHz,  $\text{DMSO-}d_6$ ):

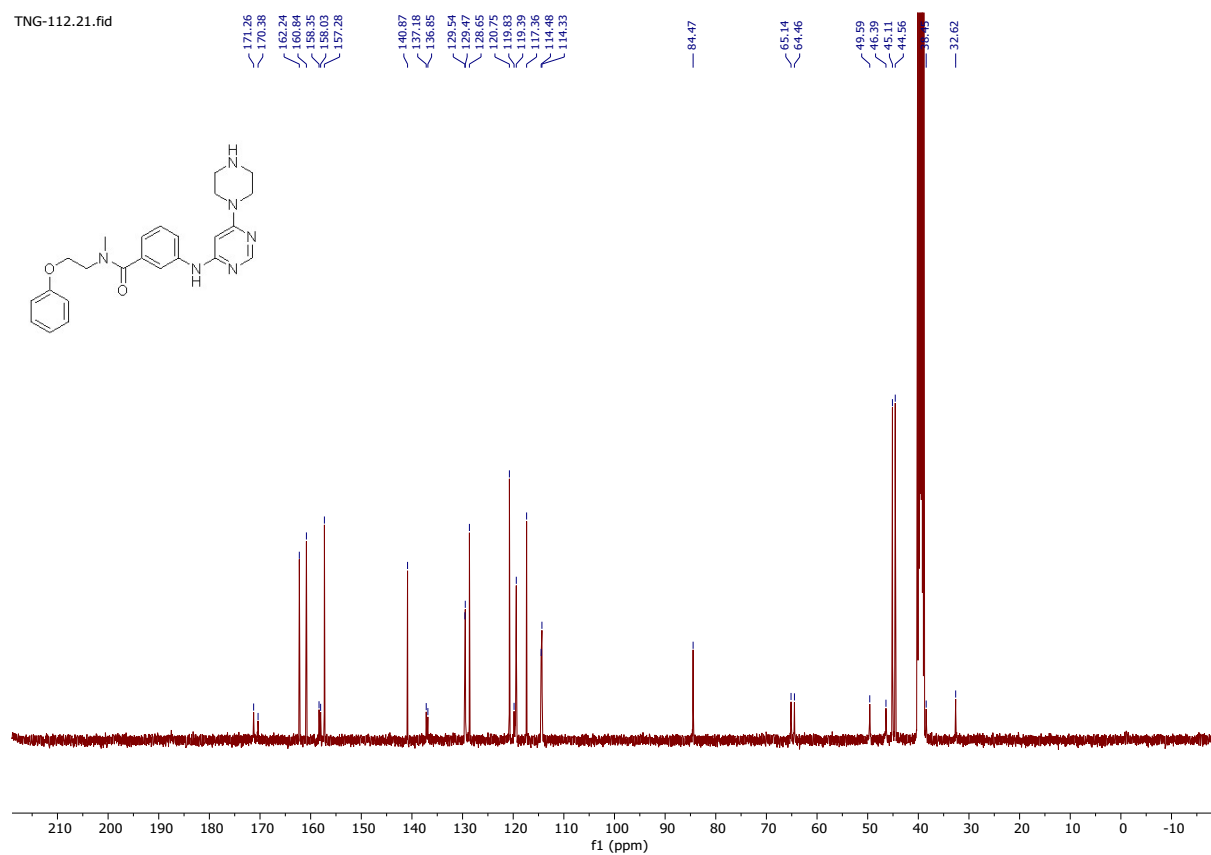

Compound **13f**  $^1\text{H}$  NMR (400 MHz,  $\text{DMSO-}d_6$ ):

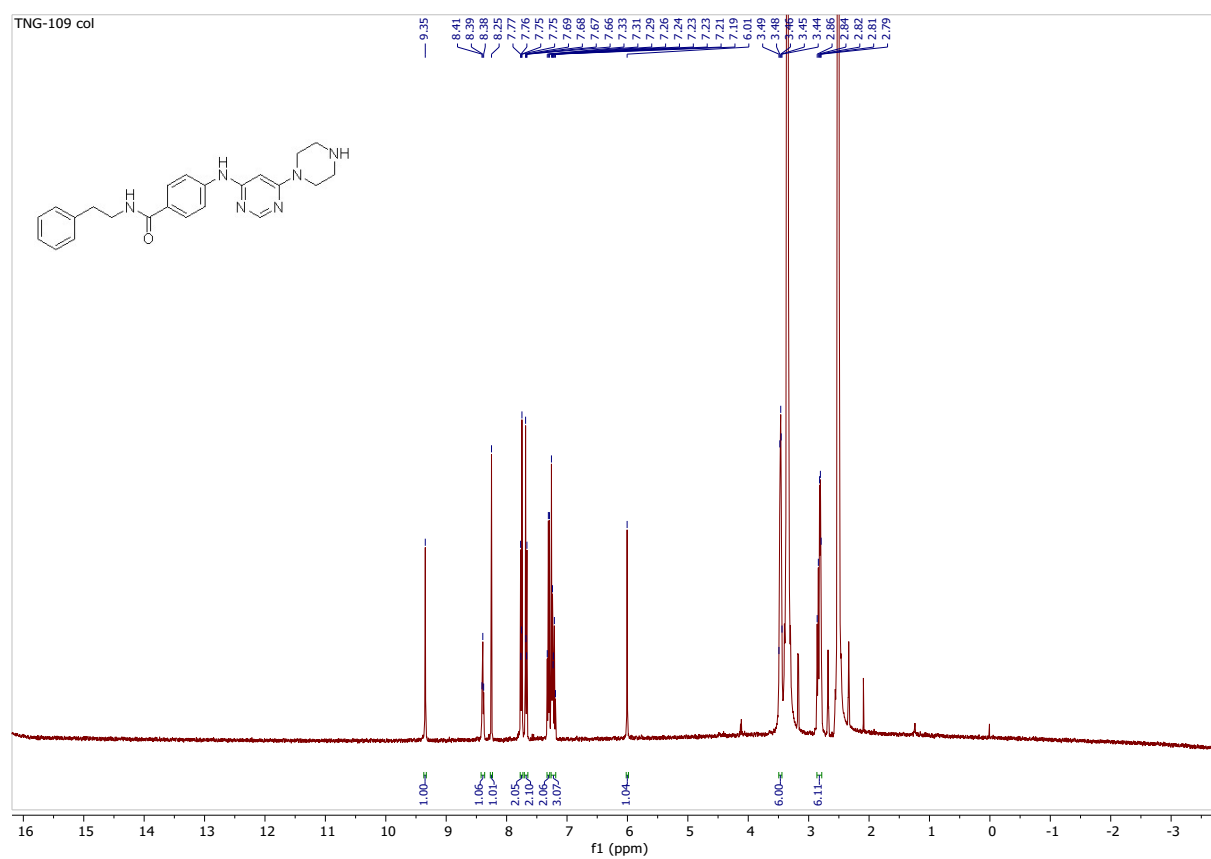

Compound **13f**  $^{13}\text{C}$  NMR (101 MHz,  $\text{DMSO-}d_6$ ):

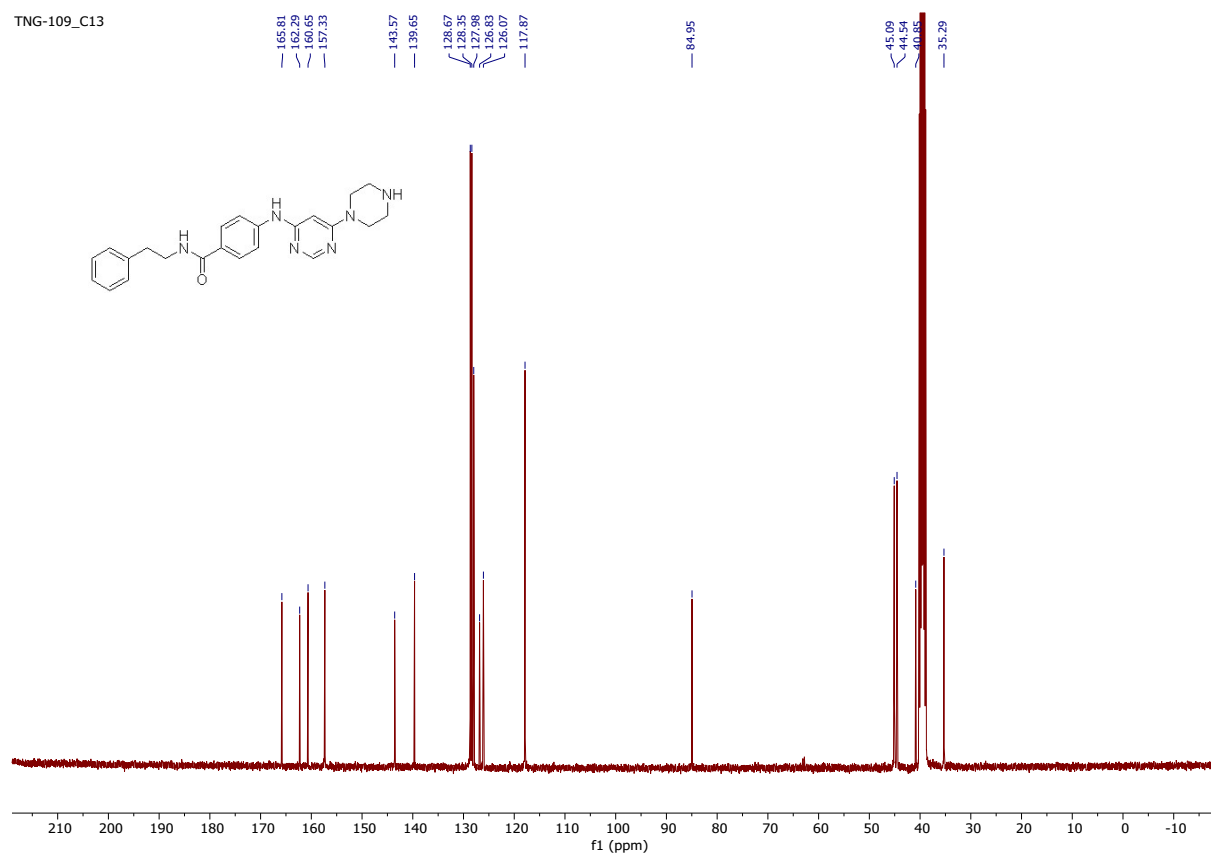

Compound **13g**  $^1\text{H}$  NMR (400 MHz,  $\text{DMSO-}d_6$ ):

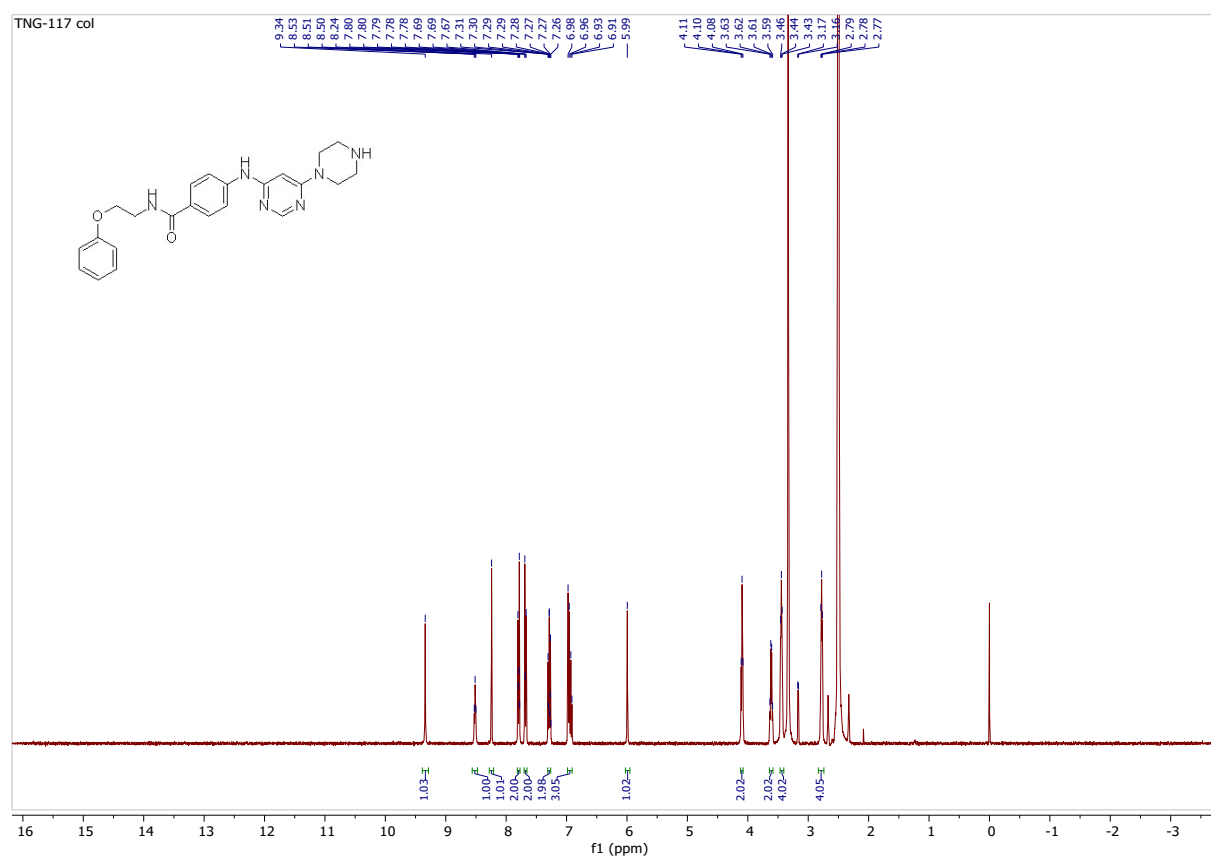

Compound **13g**  $^{13}\text{C}$  NMR (101 MHz,  $\text{DMSO-}d_6$ ):

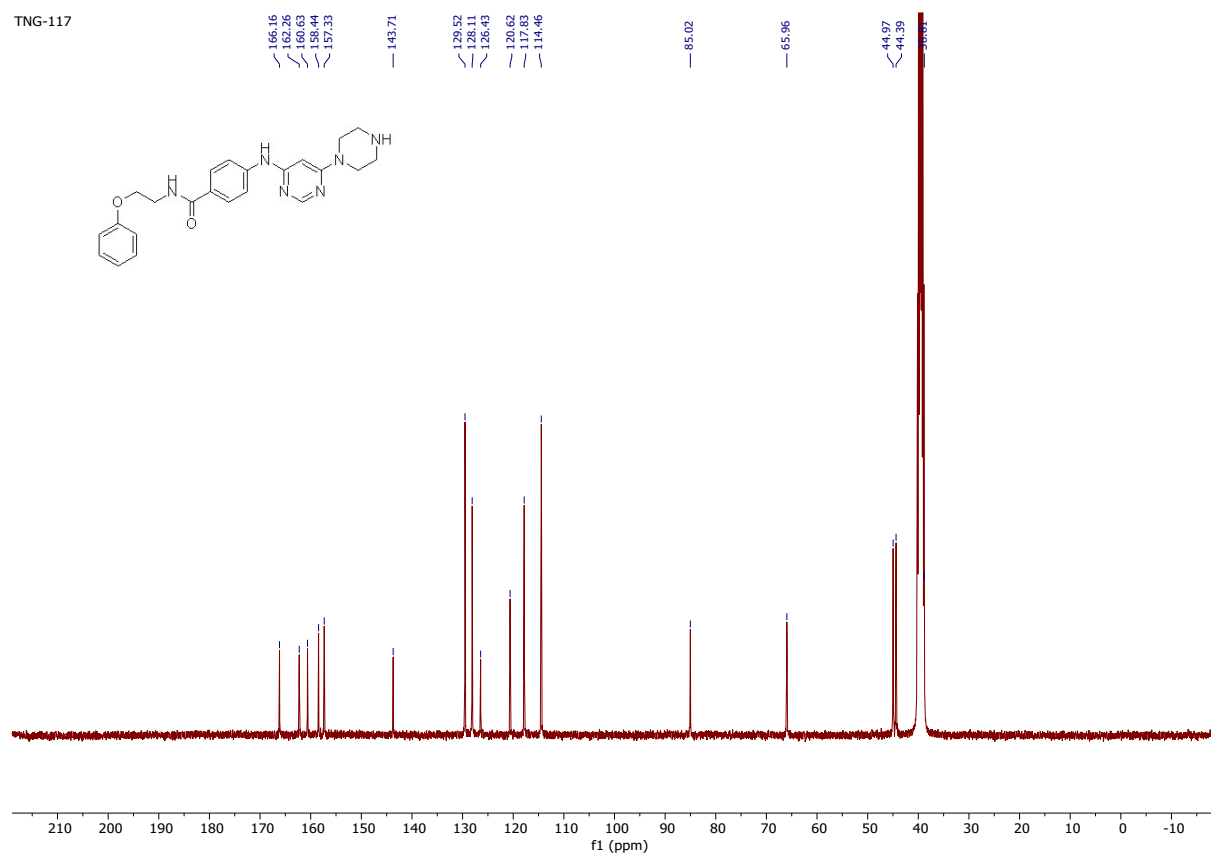

Compound **13h**  $^1\text{H}$  NMR (400 MHz,  $\text{DMSO-}d_6$ ):

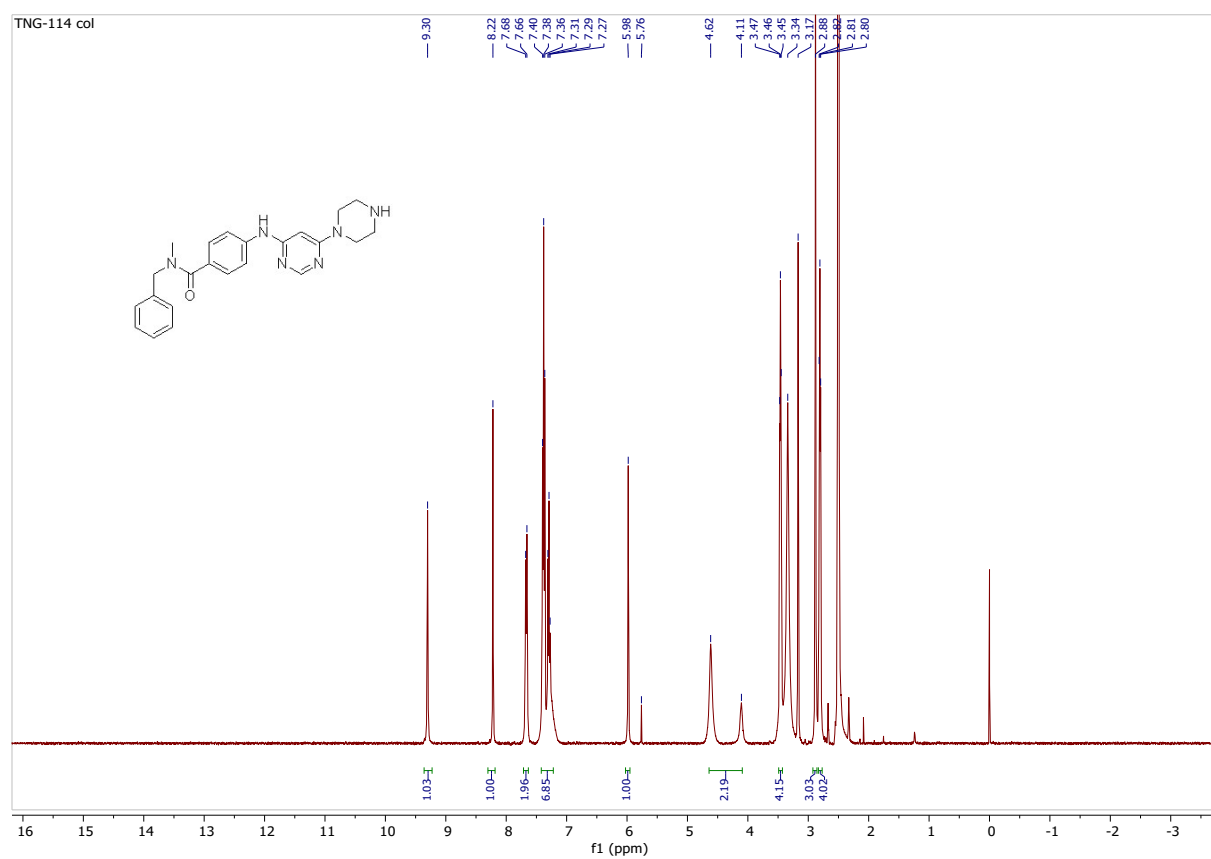

Compound **13h**  $^{13}\text{C}$  NMR (101 MHz,  $\text{DMSO-}d_6$ ):

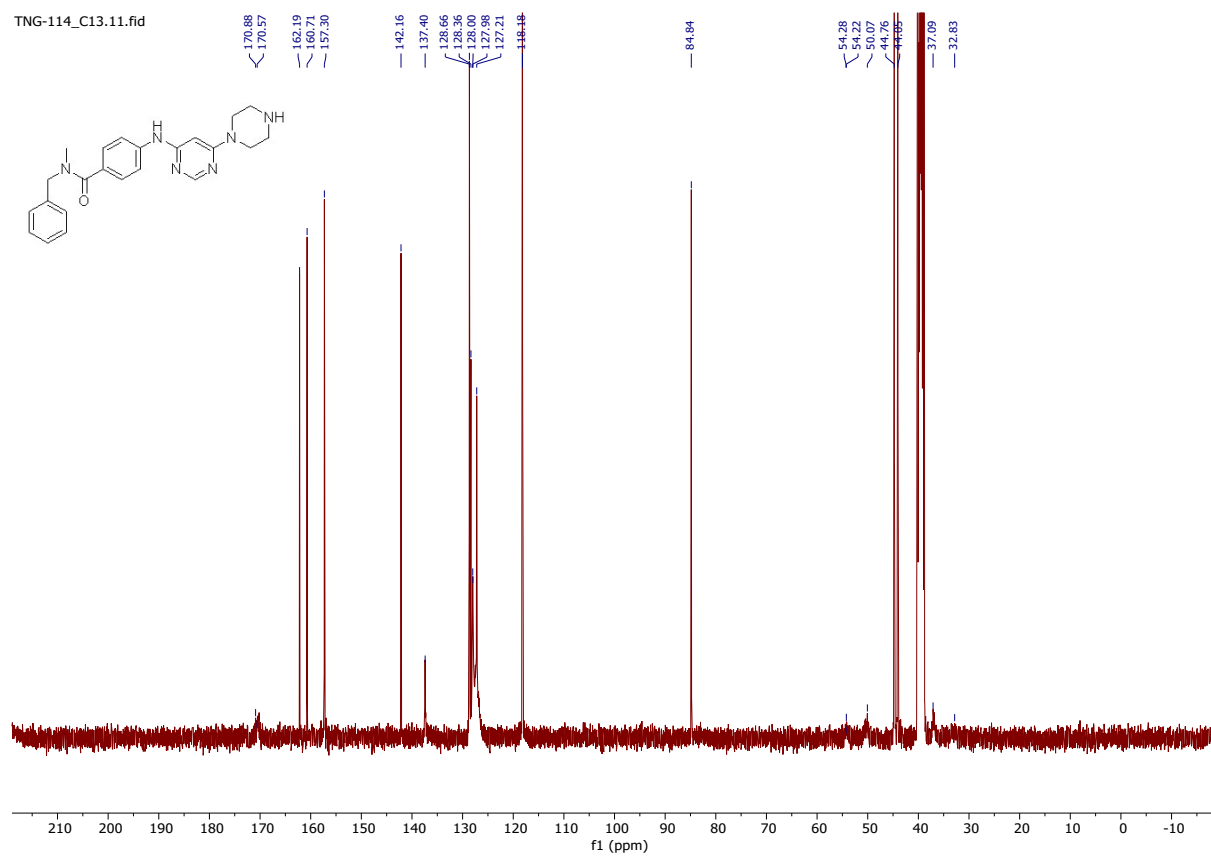

Compound **13i**  $^1\text{H}$  NMR (400 MHz,  $\text{DMSO-}d_6$ ):

TTG-18 col

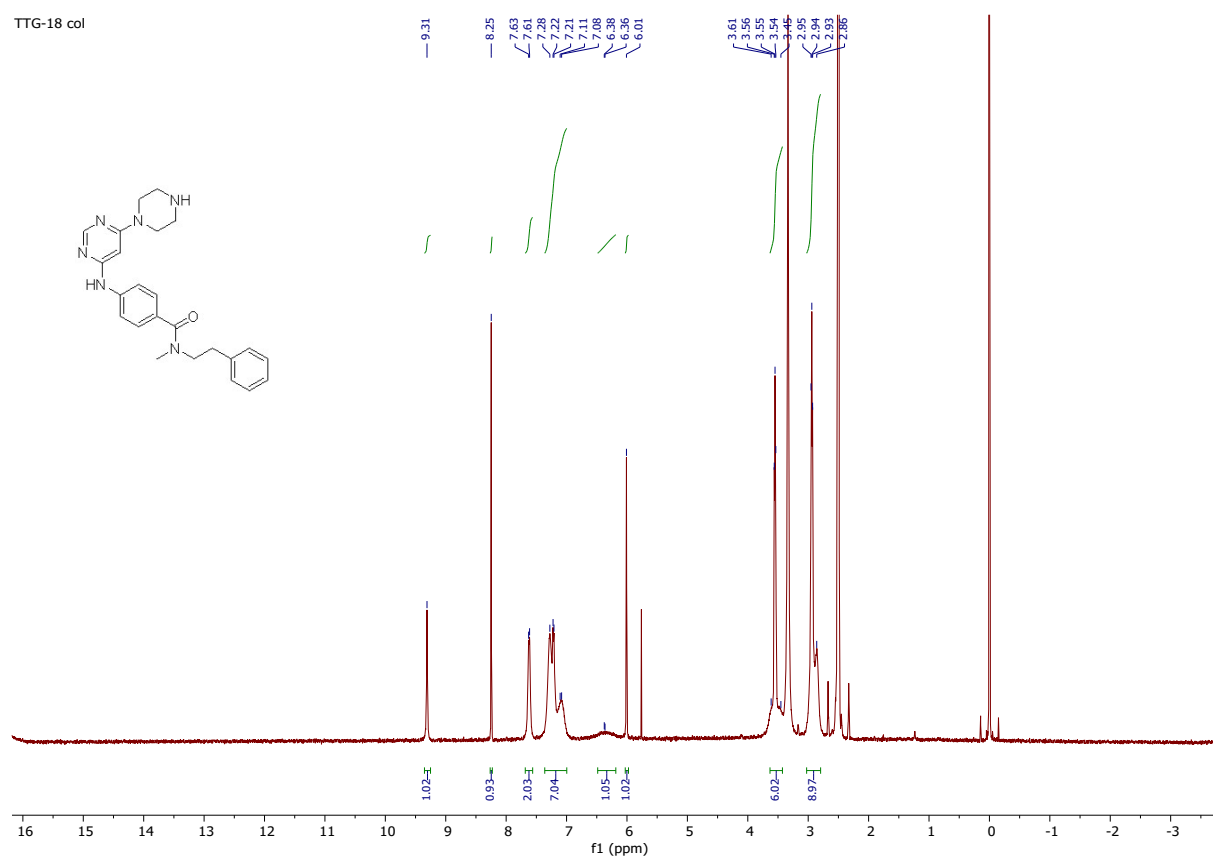

Compound **13i**  $^{13}\text{C}$  NMR (101 MHz,  $\text{DMSO-}d_6$ ):

TTG-18 13C.11.fid

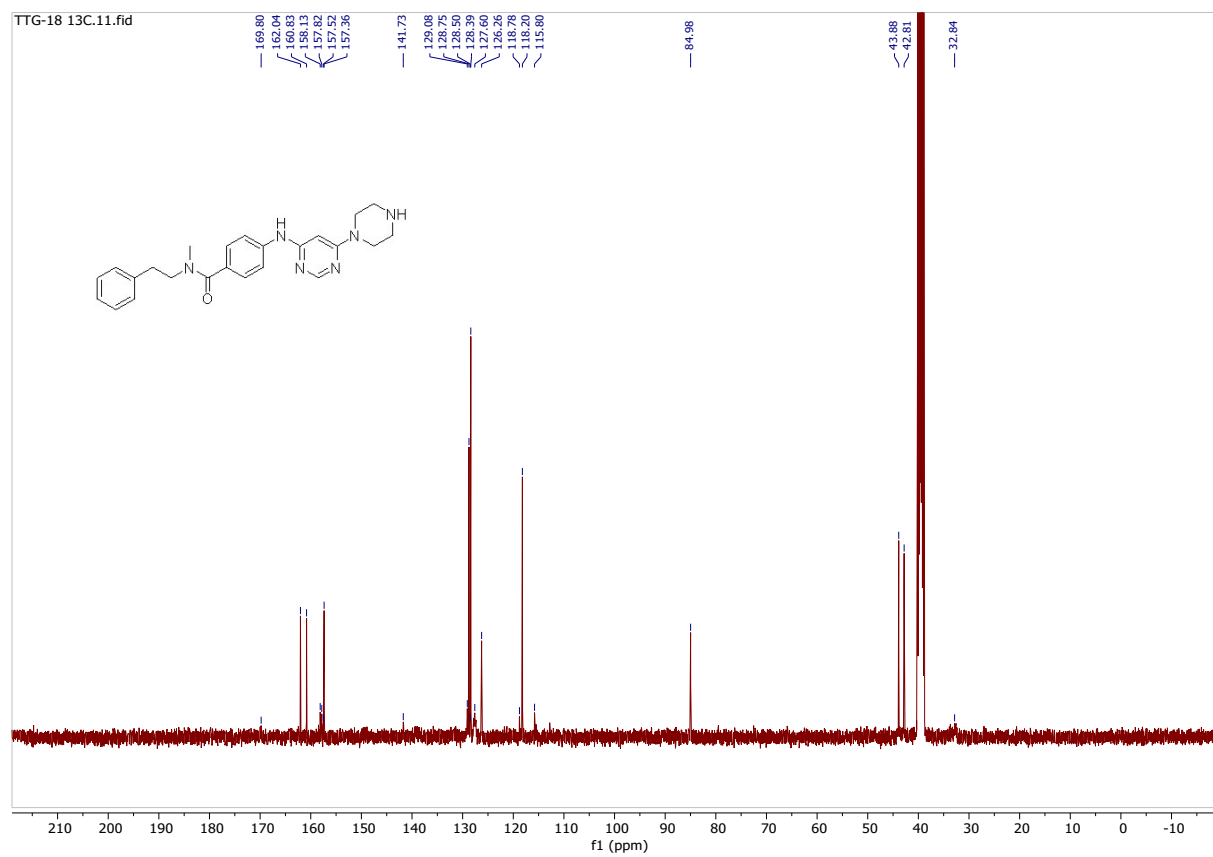



Compound **13j**  $^1\text{H}$  NMR (400 MHz,  $\text{DMSO-}d_6$ ):

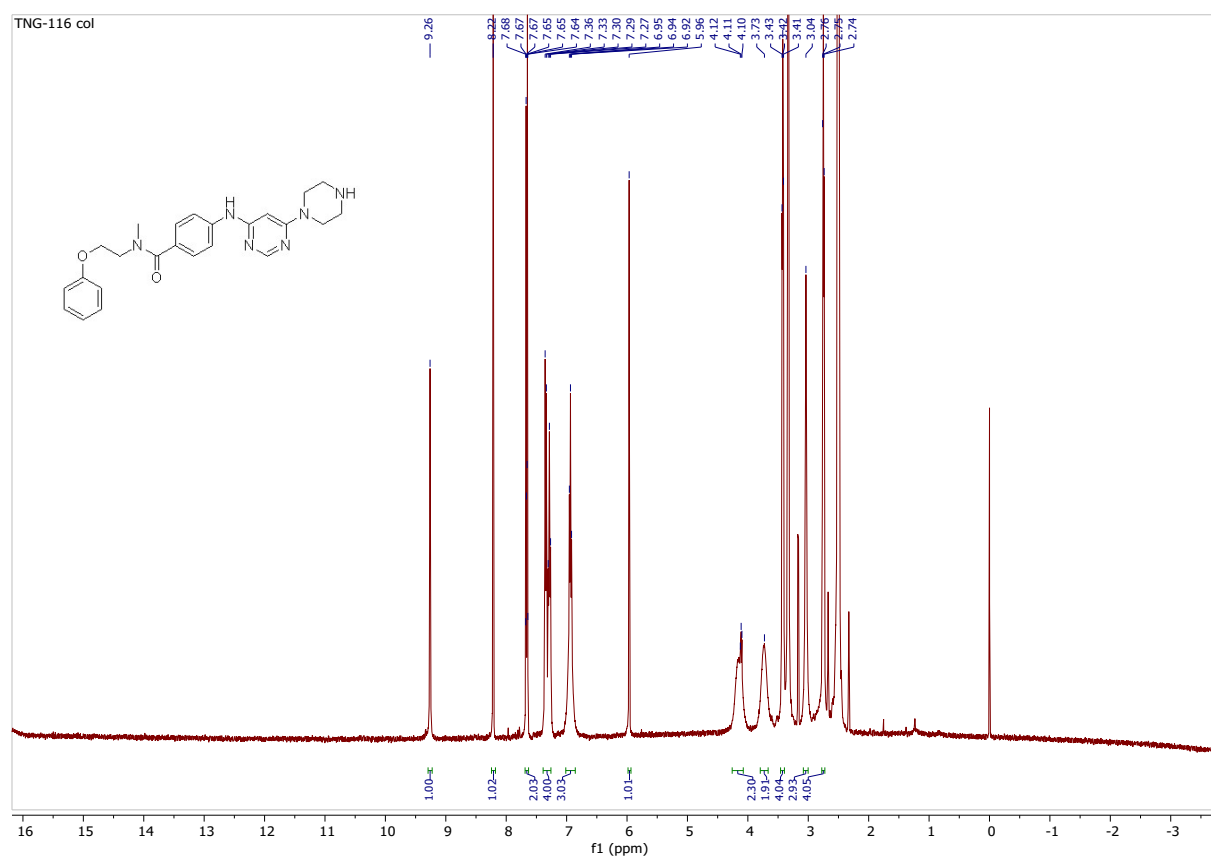

Compound **13j**  $^{13}\text{C}$  NMR (101 MHz,  $\text{DMSO-}d_6$ ):

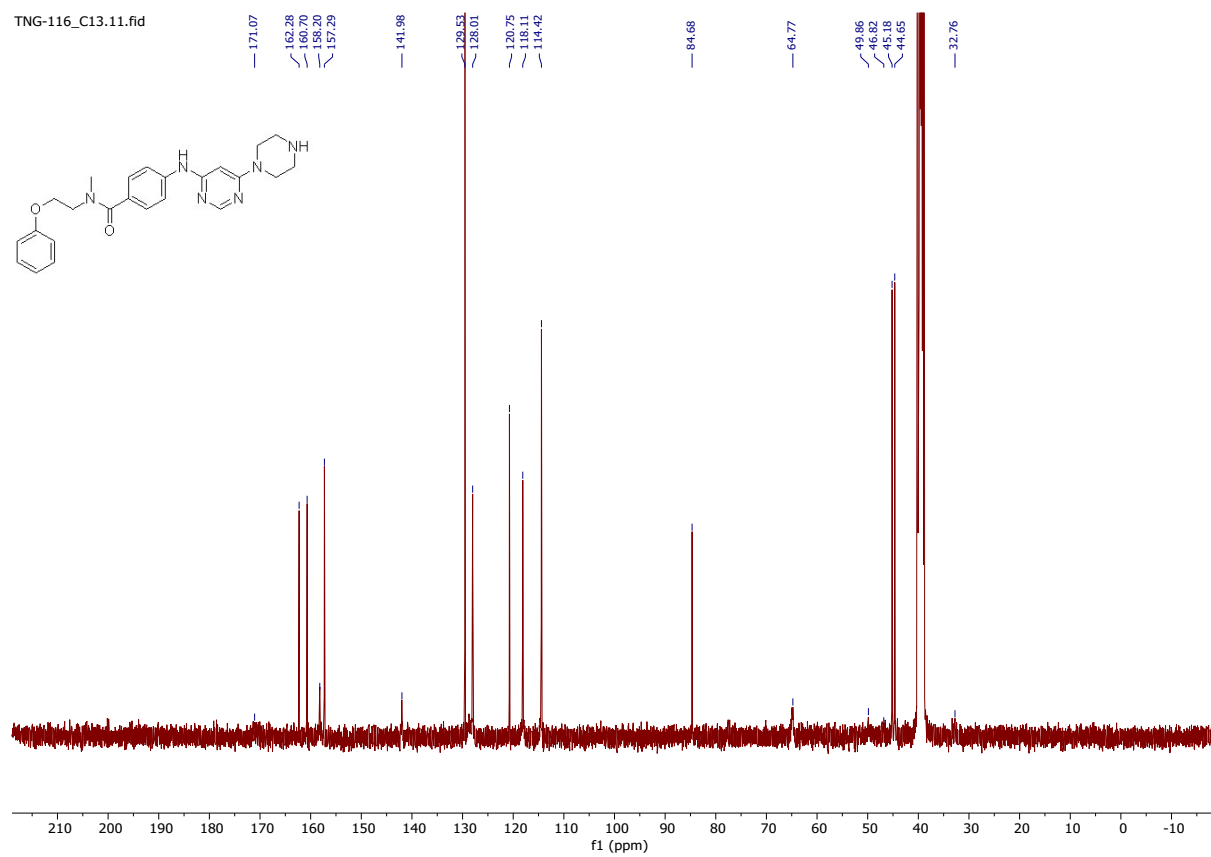

Compound 14 <sup>1</sup>H NMR (400 MHz, DMSO-*d*<sub>6</sub>):

TTG-15 13C.10.fid

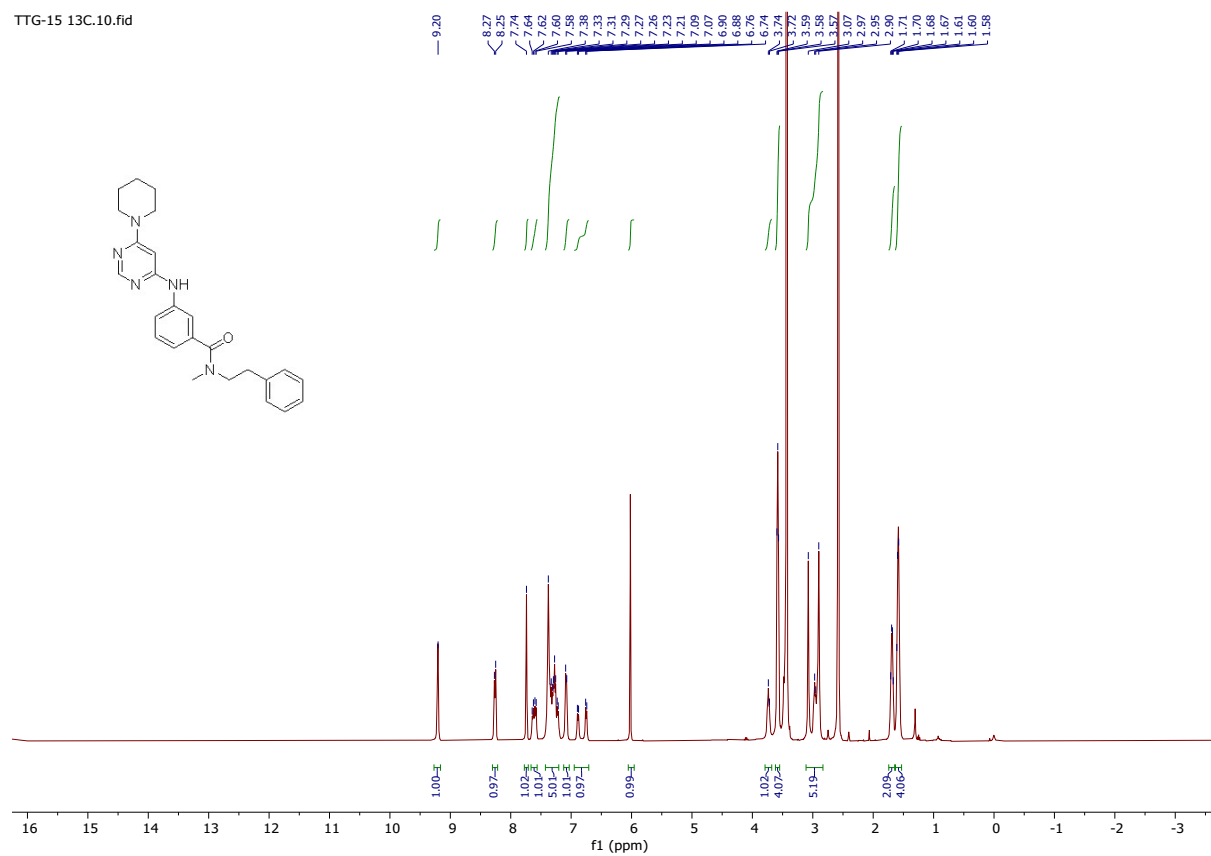

Compound 14 <sup>13</sup>C NMR (101 MHz, DMSO-*d*<sub>6</sub>):

TTG-15 13C.11.fid

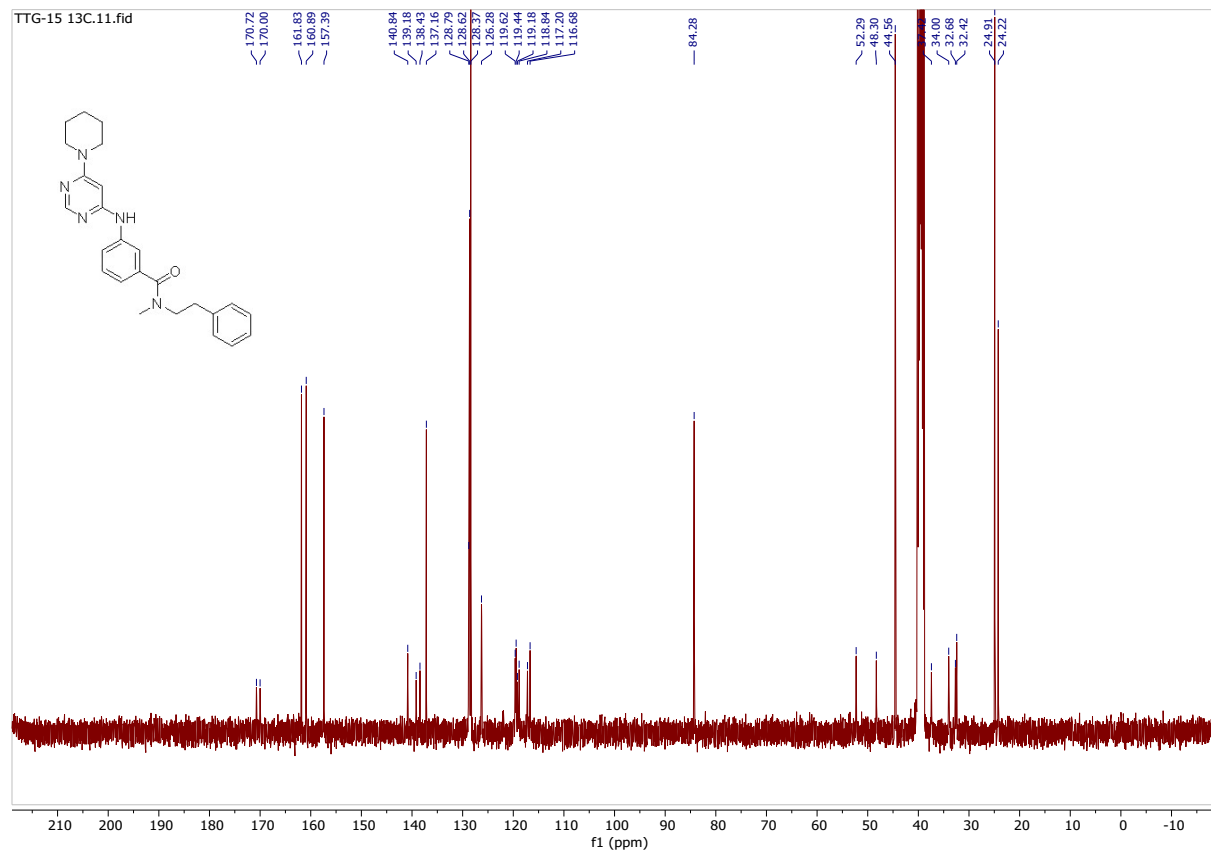

Compound **15**  $^1\text{H}$  NMR (400 MHz,  $\text{DMSO-}d_6$ ):

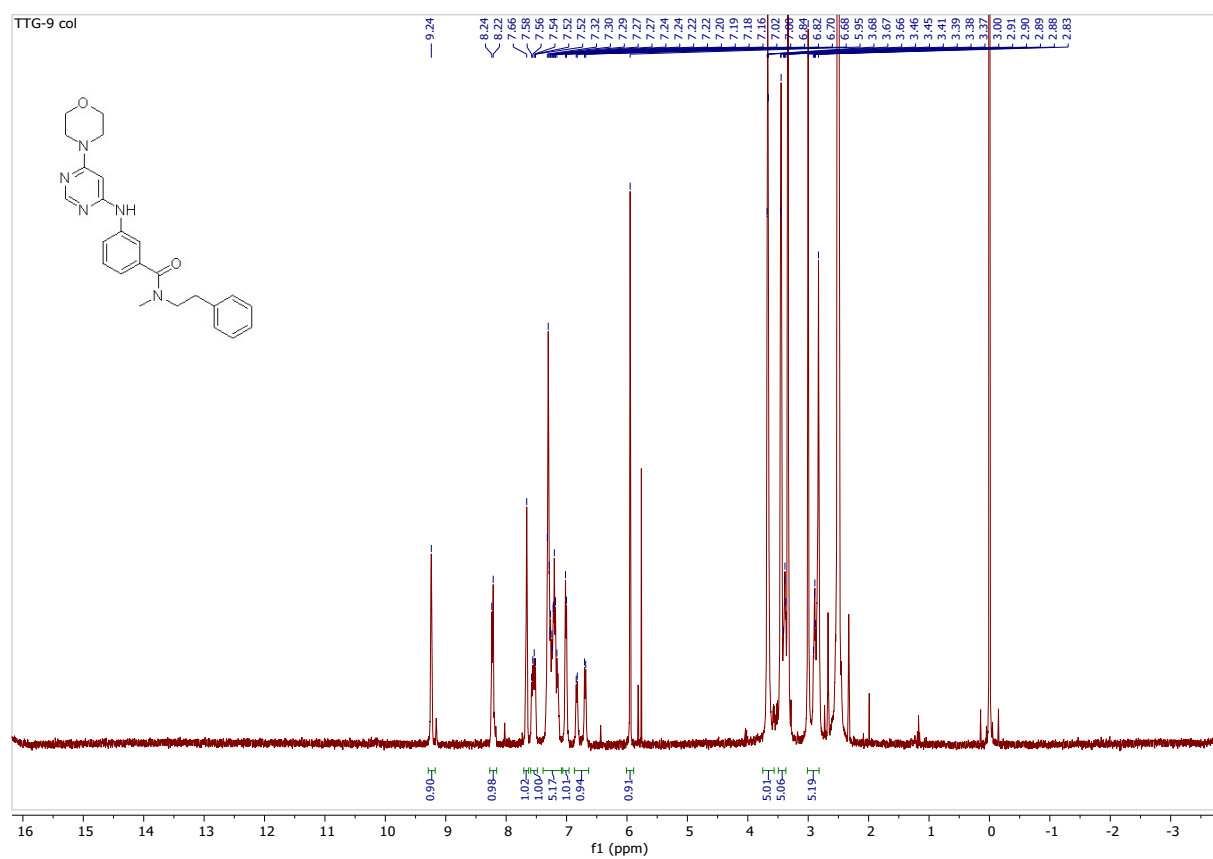

Compound **15**  $^{13}\text{C}$  NMR (101 MHz,  $\text{DMSO-}d_6$ ):

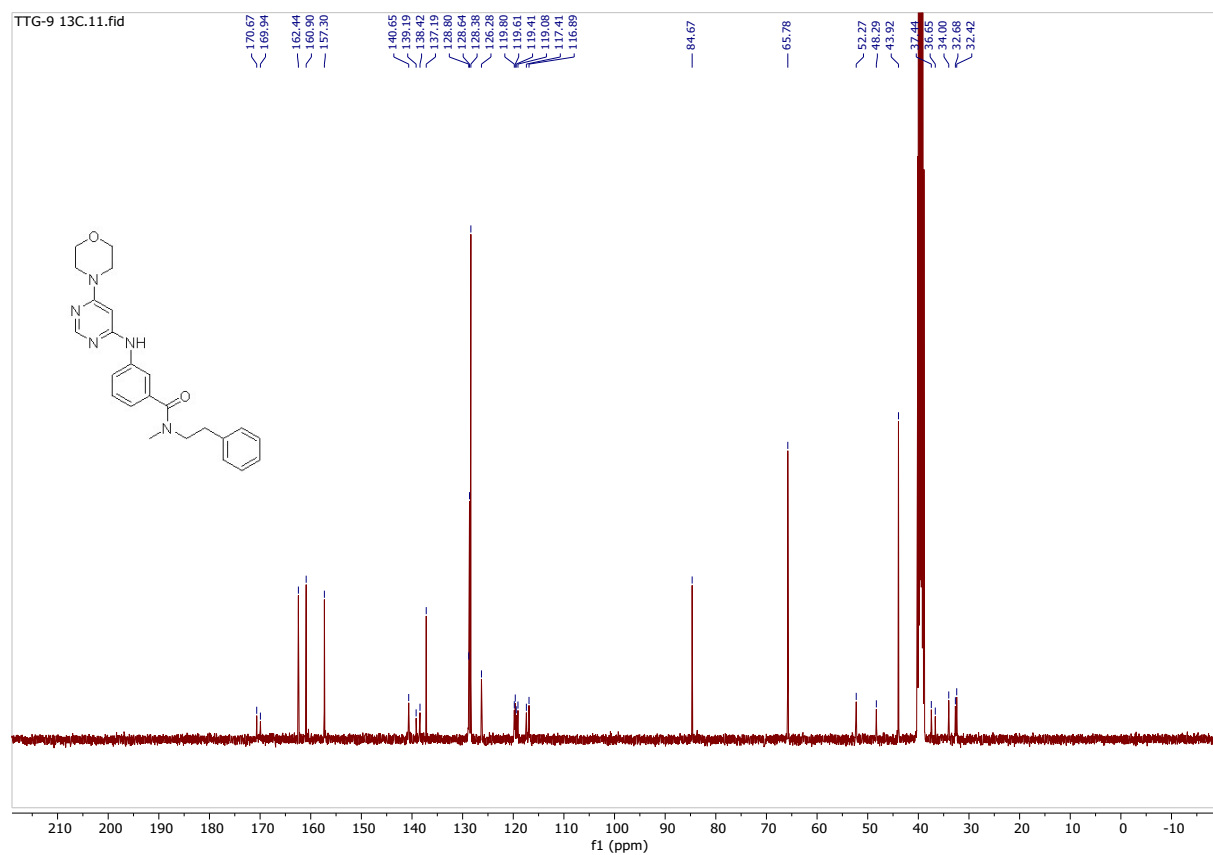

Compound **16**  $^1\text{H}$  NMR (400 MHz,  $\text{DMSO-}d_6$ ):

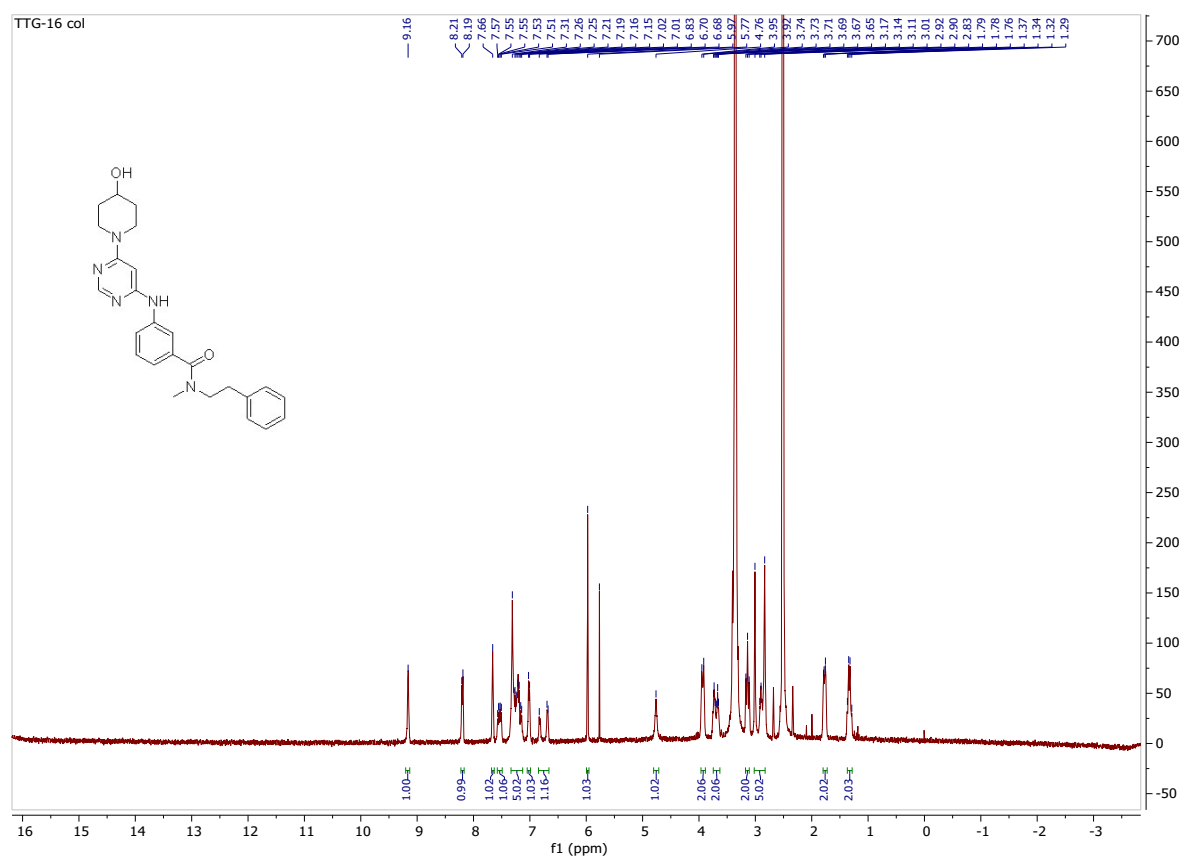

Compound **16**  $^{13}\text{C}$  NMR (101 MHz,  $\text{DMSO-}d_6$ ):

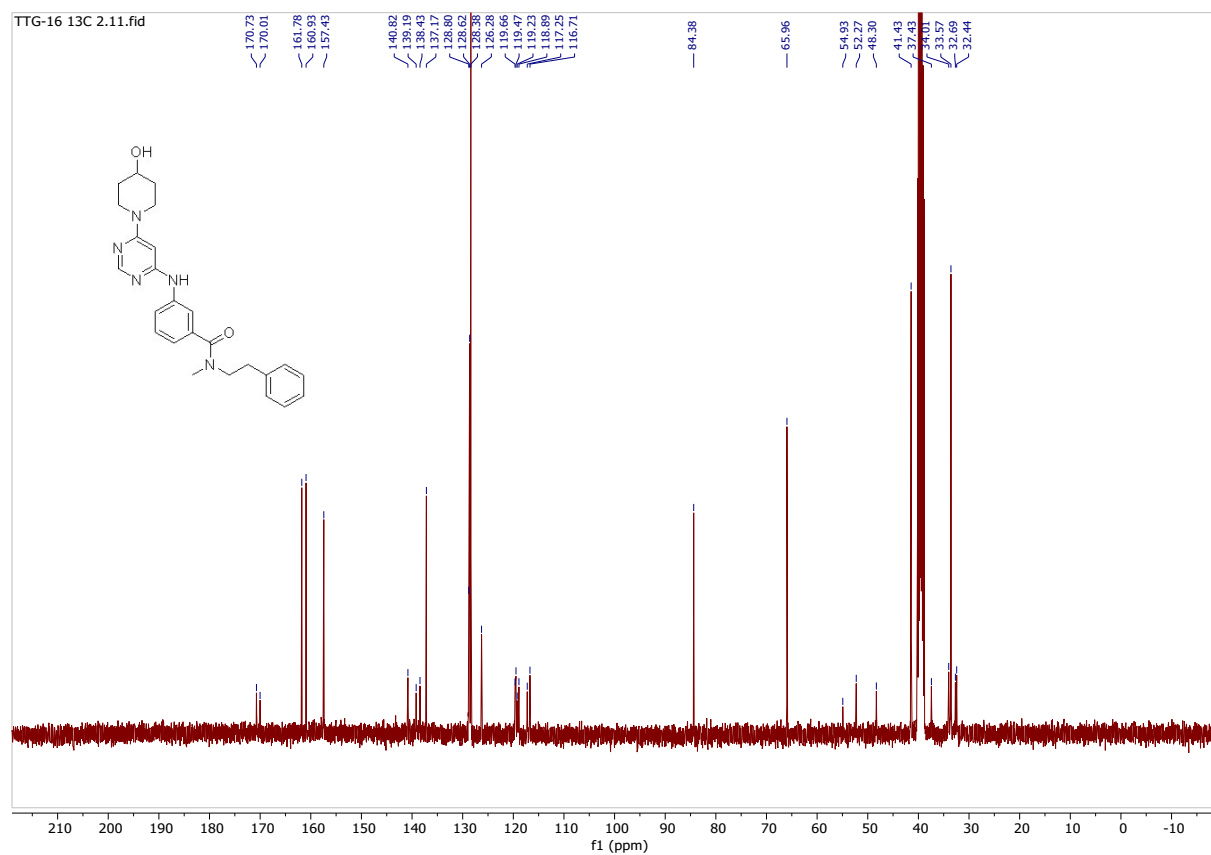

Compound **18**  $^1\text{H}$  NMR (400 MHz,  $\text{DMSO}-d_6$ ):

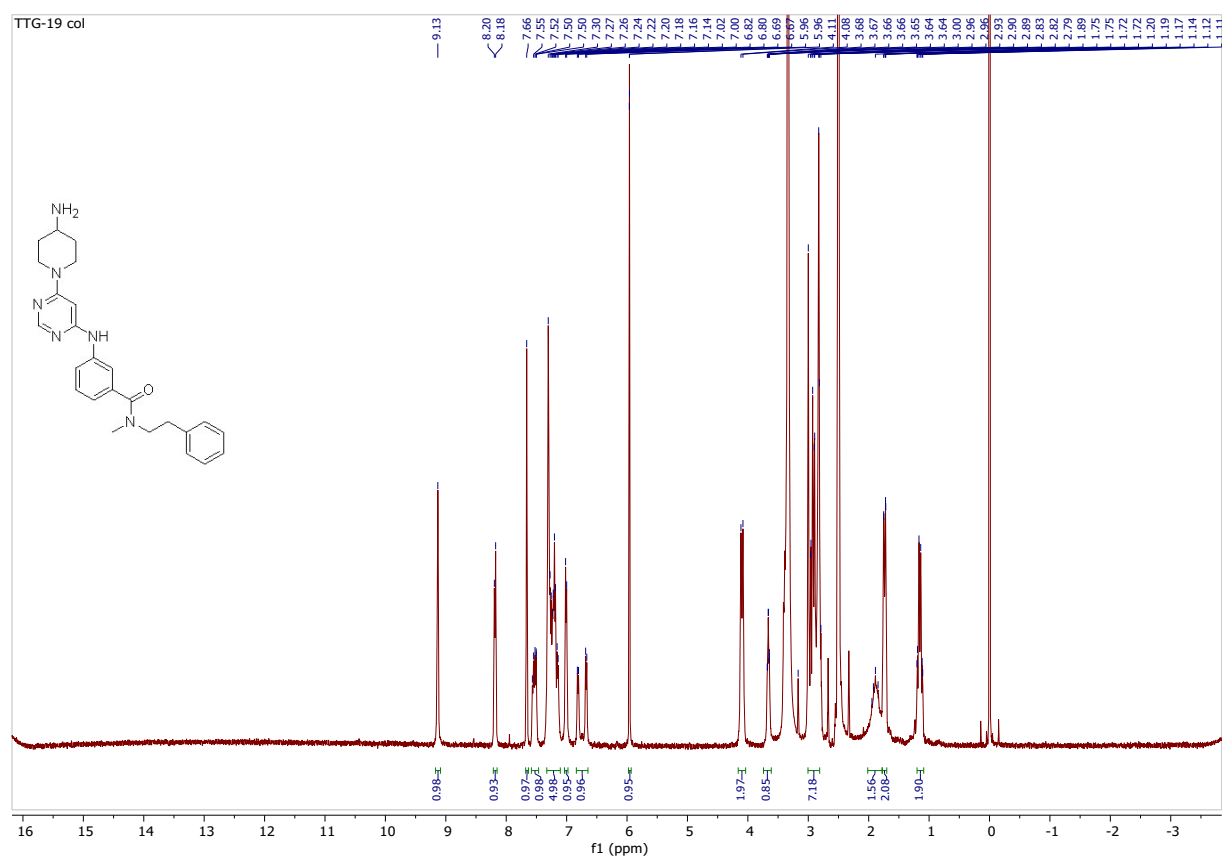

Compound **18**  $^{13}\text{C}$  NMR (101 MHz,  $\text{DMSO}-d_6$ ):

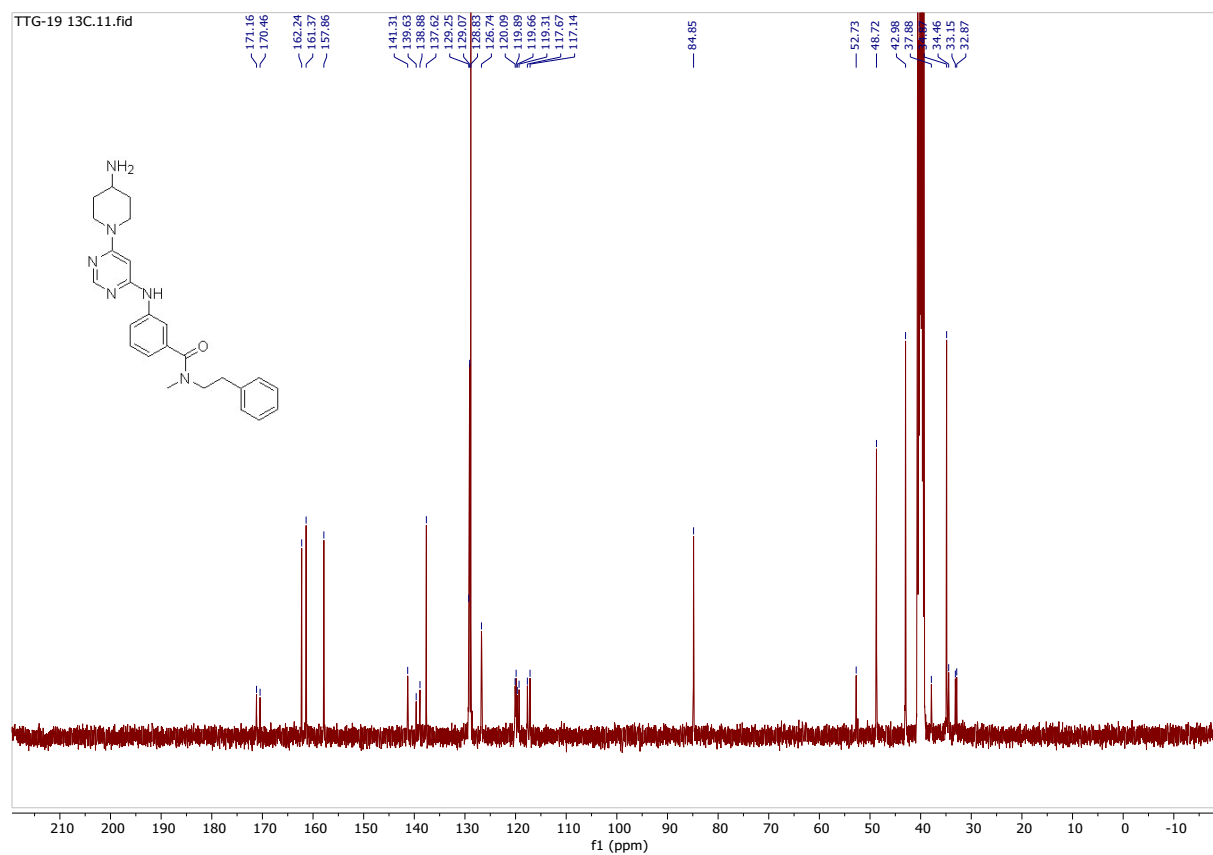

Compound **19**  $^1\text{H}$  NMR (400 MHz,  $\text{DMSO-}d_6$ ):

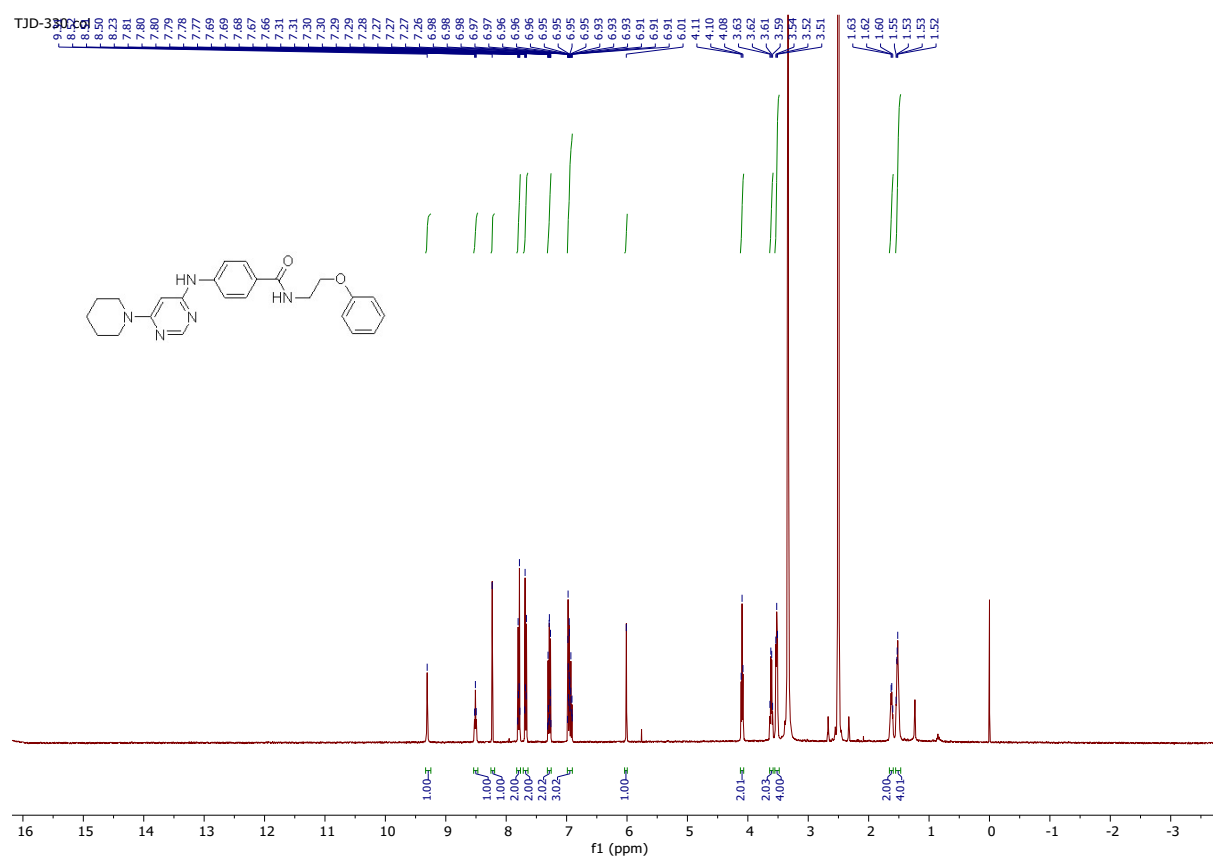

Compound **19**  $^{13}\text{C}$  NMR (101 MHz,  $\text{DMSO-}d_6$ ):

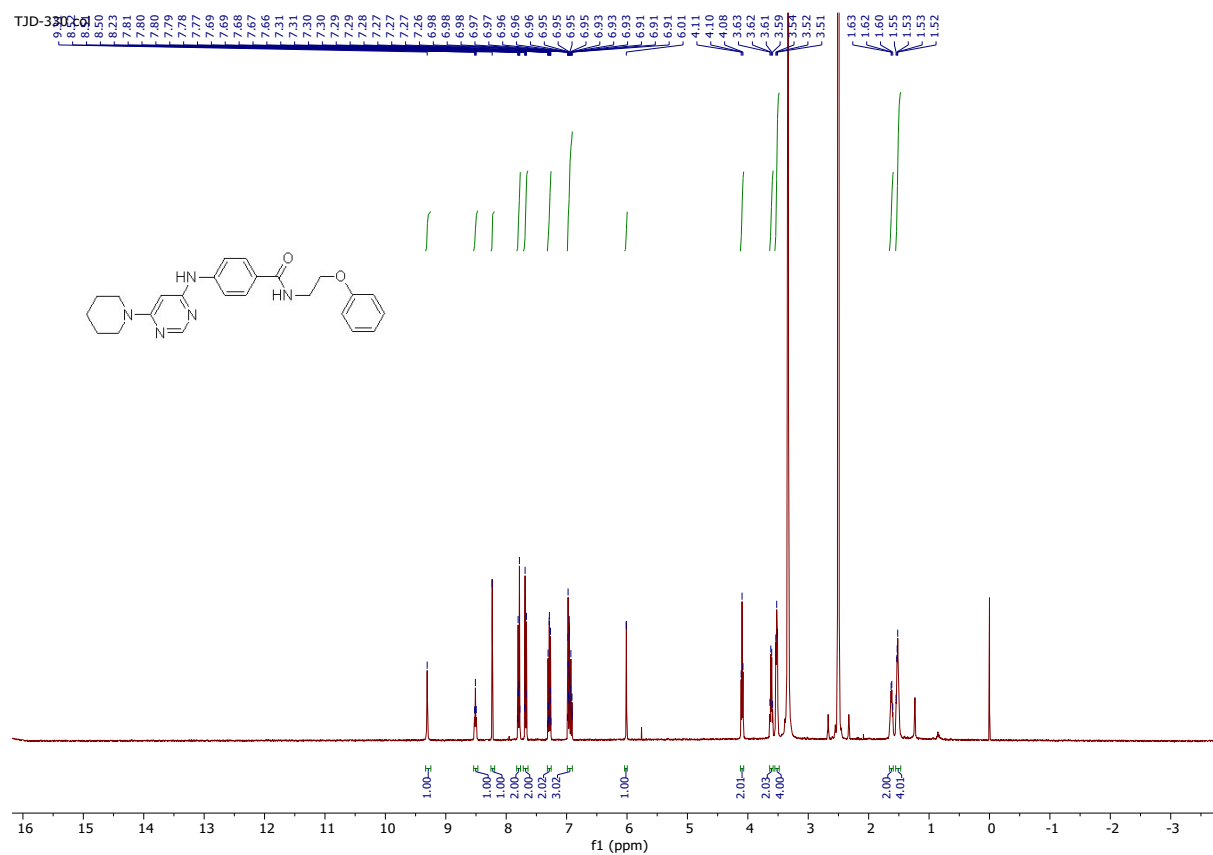

Compound **20**  $^1\text{H}$  NMR (400 MHz,  $\text{DMSO-}d_6$ ):

TJD-321 col

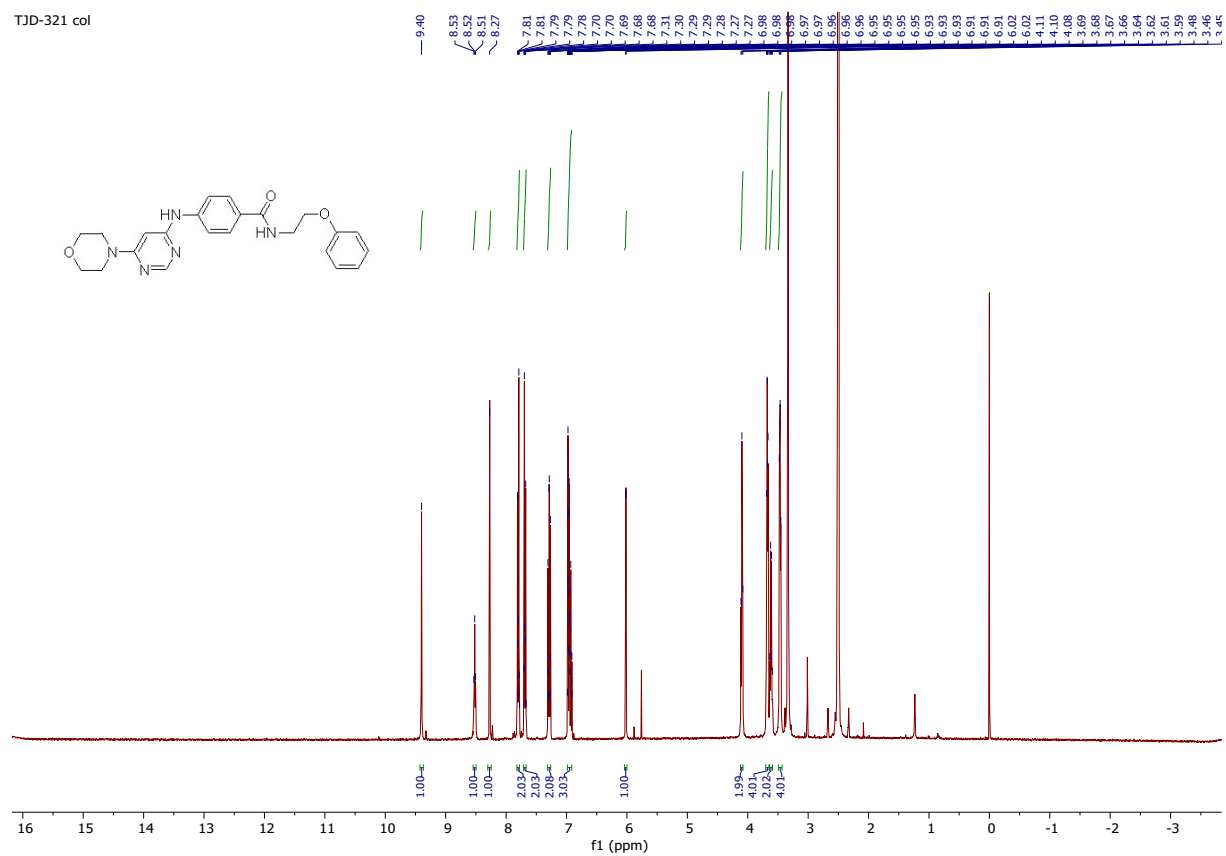

Compound **20**  $^{13}\text{C}$  NMR (101 MHz,  $\text{DMSO-}d_6$ ):

TJD-321 13C.11.fid

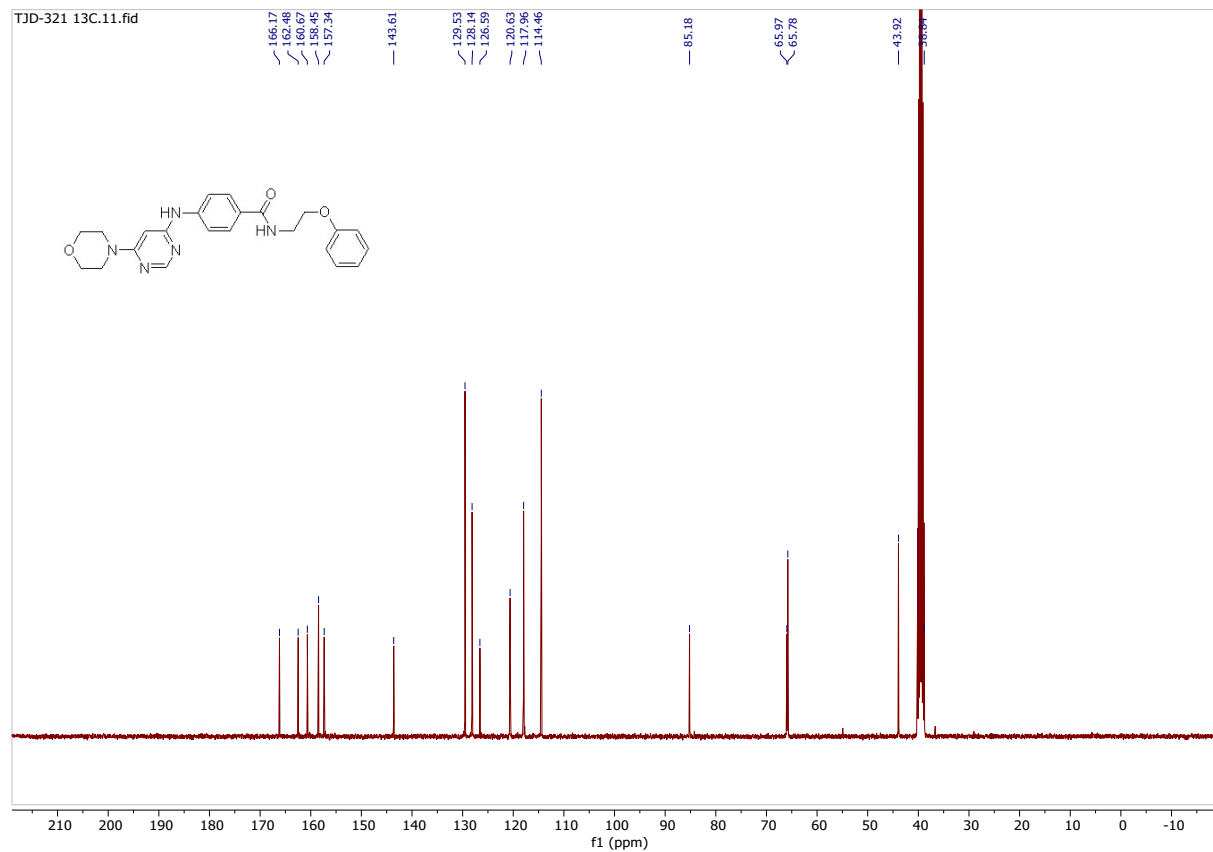

Compound **21**  $^1\text{H}$  NMR (400 MHz,  $\text{DMSO-}d_6$ ):

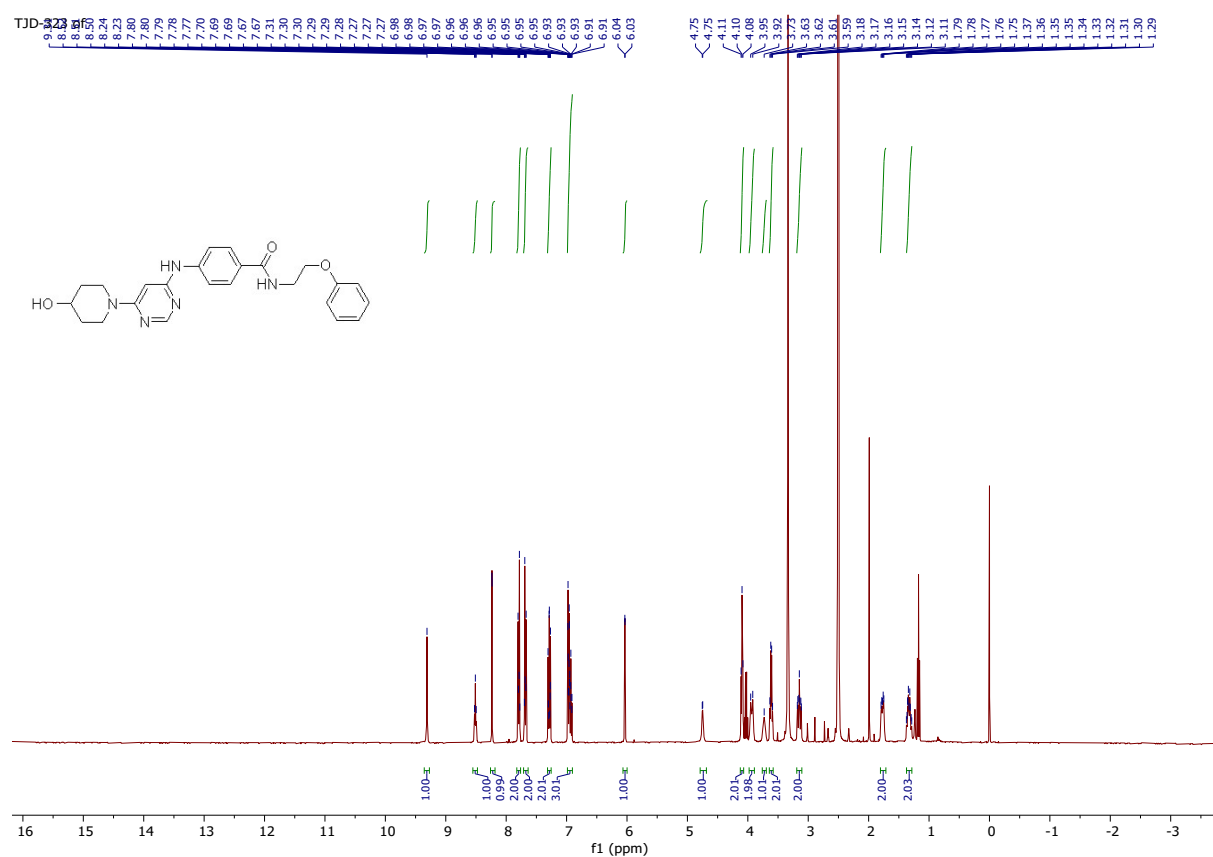

Compound **21**  $^{13}\text{C}$  NMR (101 MHz,  $\text{DMSO-}d_6$ ):

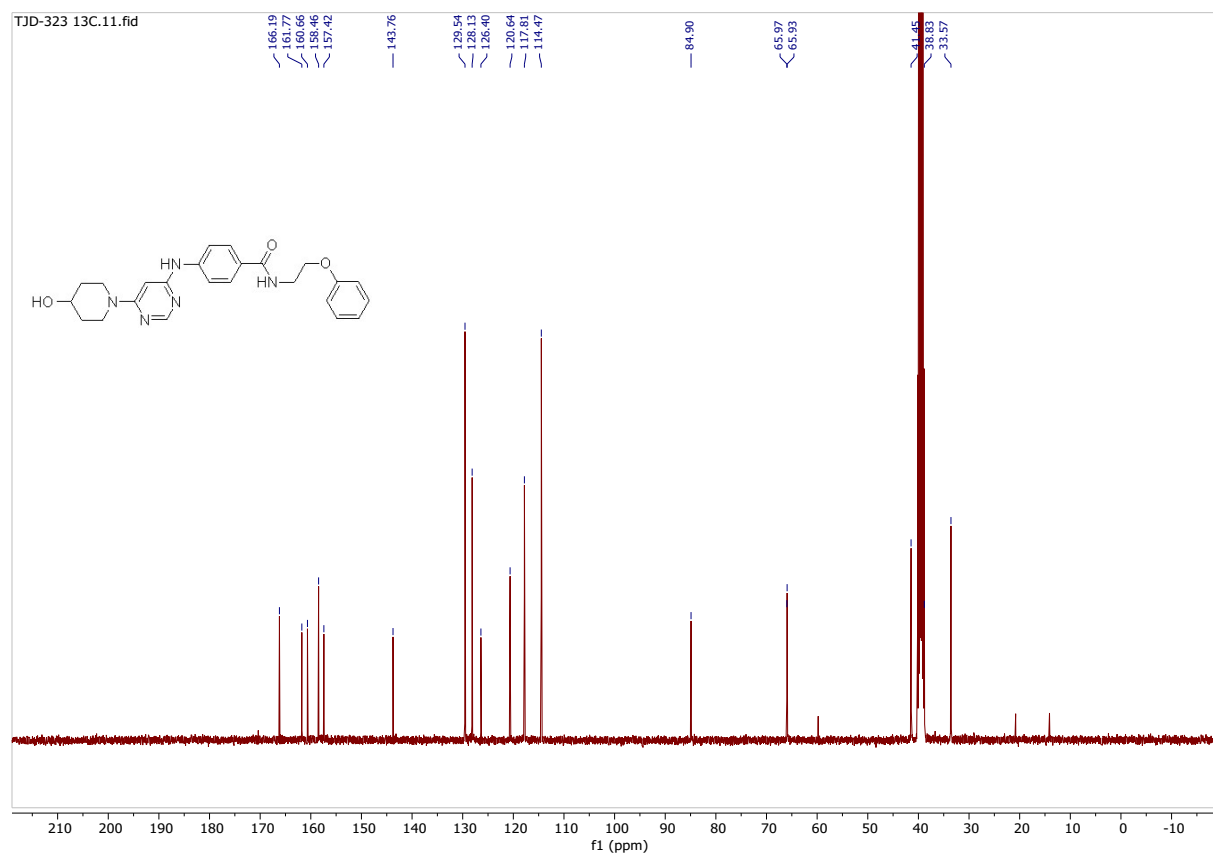



Compound **23**  $^1\text{H}$  NMR (400 MHz, DMSO- $d_6$ ):

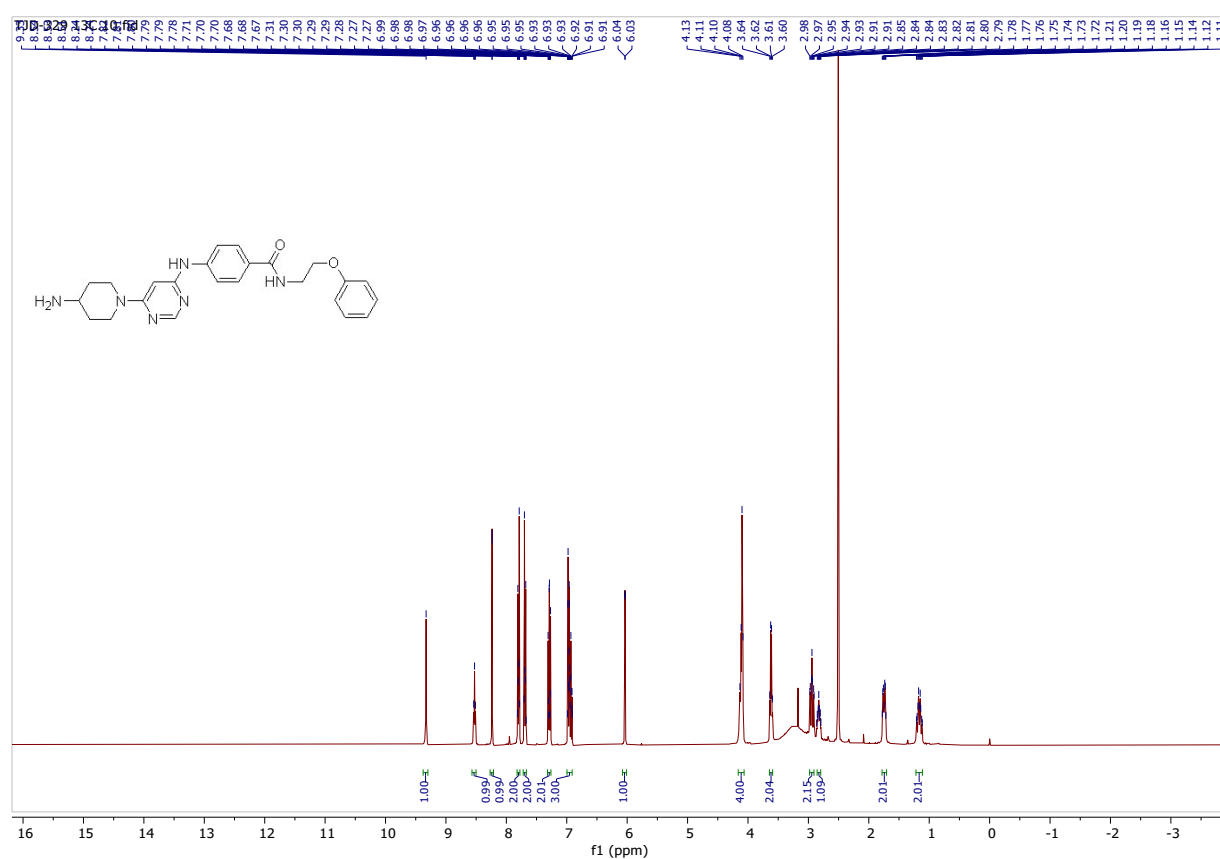

Compound **23**  $^{13}\text{C}$  NMR (101 MHz, DMSO- $d_6$ ):

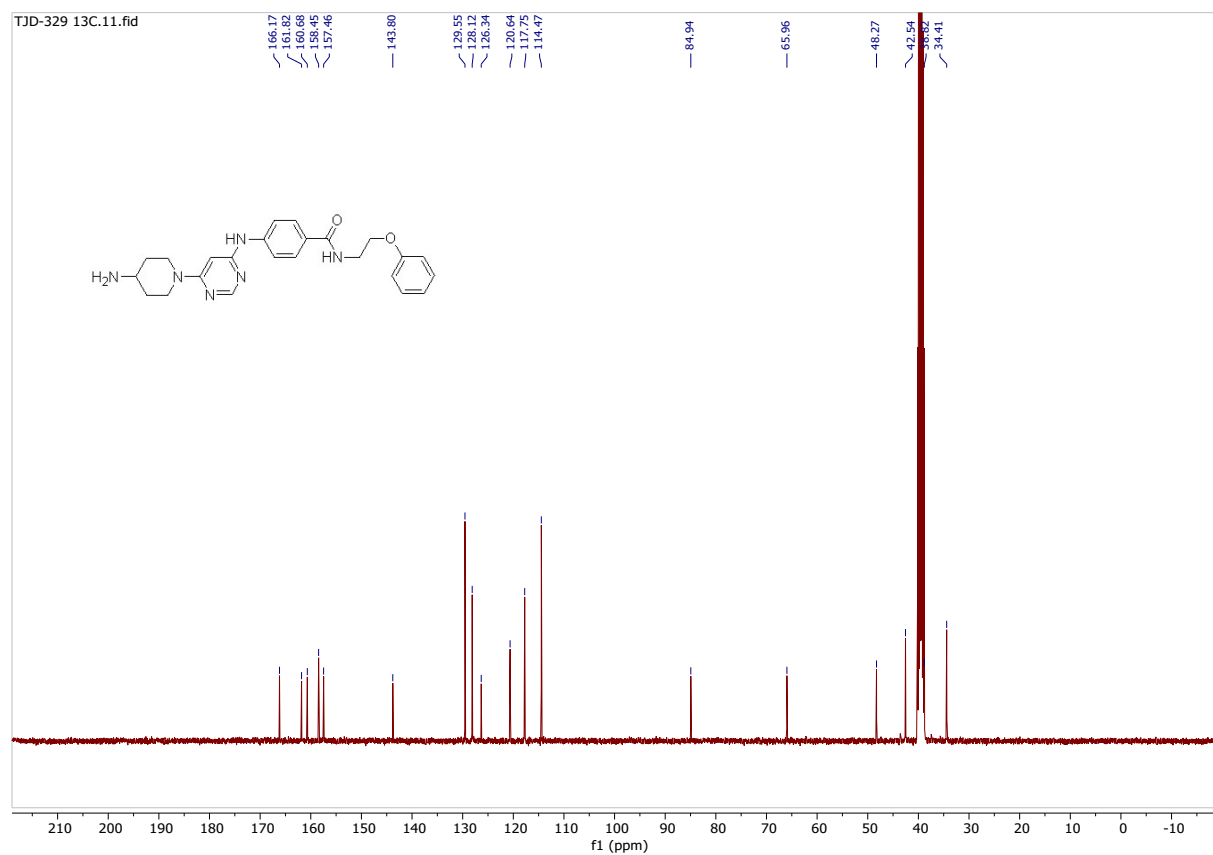

Compound **24**  $^1\text{H}$  NMR (400 MHz,  $\text{DMSO-}d_6$ ):

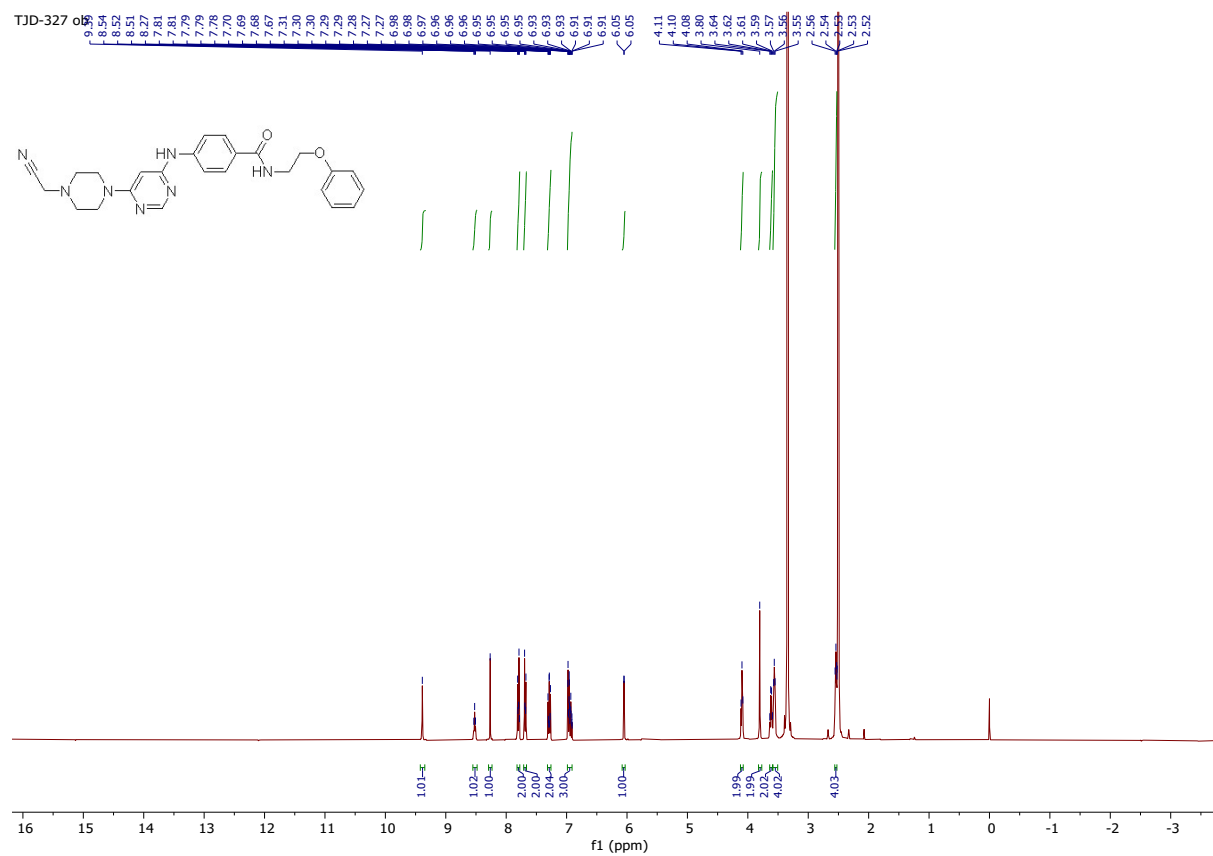

Compound **24**  $^{13}\text{C}$  NMR (101 MHz,  $\text{DMSO-}d_6$ ):

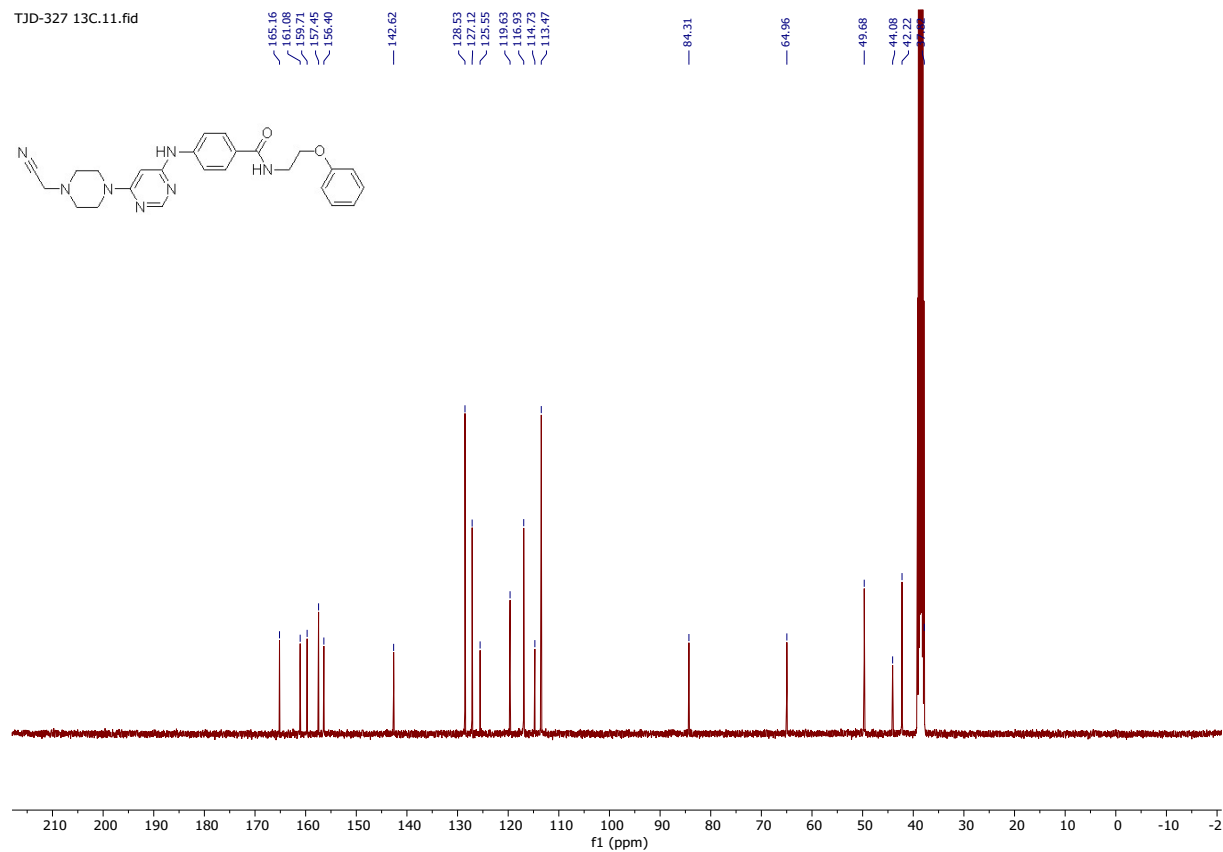

## Literature

- [1] L. Wang, J. Jiang, L. Zhang, Q. Zhang, J. Zhou, L. Li, X. Xu, Q. You, *J. Med. Chem.* **2020**, *63*, 1281–1297.
